# Supplementary material
Source: PubMed Central journal article supplement (PMC9531086)

## Supplemental Online Content

Suarez EA, Bateman BT, Hernández-Díaz S, et al. Association of antidepressant use during pregnancy with risk of neurodevelopmental disorders in children. *JAMA Intern Med*. Published online October 3, 2022. doi:10.1001/jamainternmed.2022.4268

**eMethods.** Additional methods and results for the sibling analyses

**eTable 1.** Outcome definitions for neurodevelopmental disorders

**eTable 2.** Full list of covariates included in propensity score models and assessment periods

**eTable 3.** Hazard ratios and 95% confidence intervals for antidepressant use in late pregnancy and neurodevelopmental disorders for the main analysis and sensitivity analyses, by data source

**eTable 4.** Hazard ratios and 95% confidence intervals for antidepressant use in early pregnancy and neurodevelopmental disorders for the main analysis and sensitivity analyses, by data source

**eTable 5.** Hazard ratios and 95% confidence intervals for SSRI use in late pregnancy and neurodevelopmental disorders, by data source

**eTable 6.** Hazard ratios and 95% confidence intervals for SNRI use in late pregnancy and neurodevelopmental disorders, by data source

**eTable 7.** Hazard ratios and 95% confidence intervals for TCA use in late pregnancy and neurodevelopmental disorders, by data source

**eTable 8.** Hazard ratios and 95% confidence intervals for sertraline use in late pregnancy and neurodevelopmental disorders, by data source

**eTable 9.** Hazard ratios and 95% confidence intervals for fluoxetine use in late pregnancy and neurodevelopmental disorders, by data source

**eTable 10.** Hazard ratios and 95% confidence intervals for bupropion use in late pregnancy and neurodevelopmental disorders, by data source

**eTable 11.** Hazard ratios and 95% confidence intervals for citalopram use in late pregnancy and neurodevelopmental disorders, by data source

**eTable 12.** Hazard ratios and 95% confidence intervals for escitalopram use in late pregnancy and neurodevelopmental disorders, by data source

**eTable 13.** Characteristics of the cohort for individuals exposed to antidepressants during late pregnancy and individuals unexposed to antidepressants throughout pregnancy, in MAX, crude and propensity score weighted results

**eTable 14.** Characteristics of the cohort for individuals exposed to antidepressants during late pregnancy and individuals unexposed to antidepressants throughout pregnancy, in MarketScan, crude and propensity score weighted results

**eTable 15.** Characteristics of the cohort for individuals exposed to antidepressants during early pregnancy and individuals unexposed to antidepressants throughout pregnancy, in MAX, crude and propensity score weighted results

**eTable 16.** Characteristics of the cohort for individuals exposed to antidepressants during early pregnancy and individuals unexposed to antidepressants throughout pregnancy, in MarketScan, crude and propensity score weighted results

**eTable 17.** Sibling analysis for antidepressant use during late pregnancy and NDDs stratified by exposure status of first sibling, to investigate carry-over effects

**eTable 18.** Characteristics of the cohort for individuals exposed to specific antidepressant classes or drugs during late pregnancy, in MAX

**eTable 19.** Characteristics of the cohort for individuals exposed to specific antidepressant classes or drugs during late pregnancy, in MarketScan

**eTable 20.** Hazard ratios and 95% confidence intervals for antidepressant exposed exclusive to early or late gestational windows and neurodevelopmental disorders, results pooled across data sources

**eTable 21.** Counts and crude and adjusted HR (95% CI) for sibling analysis for antidepressant use during late and early pregnancy compared to unexposed, pooled MAX and MarketScan data

**eTable 22.** Crude and adjusted HR (95% CI) within the full sibling population for antidepressant use during late pregnancy compared to unexposed, pooled MAX and MarketScan data

**eFigure.** Unadjusted cumulative incidence of select neurodevelopment disorders stratified by antidepressant exposure status during pregnancy and data source

This supplemental material has been provided by the authors to give readers additional information about their work.

## eMethod. Additional methods and results for the sibling analyses

Children with at least one sibling, as identified through linkage with the record of the pregnant individual, were included in the sibling cohort. Hazard ratios adjusted for shared confounding were estimated using Cox proportional hazard models stratified on identifier. Sibling cohorts from the publicly and privately insured cohorts were pooled prior to analysis for model convergence. Siblings with discordance on exposure status and outcome timing contribute information to the stratified Cox model (eTable 21). Adjusted HR are presented in Figure 2 in the main text and in eTable 21, along with unadjusted HR. Adjusted HR were estimated by including all covariates included in the propensity score models except race/ethnicity, state, and county-level SES variables, and additionally adjusted for sibling birth order.

To ensure that the subgroup of children with siblings was representative of the full population, the main analysis was repeated in the sibling cohort by estimating HRs without stratifying by identifier and using propensity score fine stratification weights to control for confounding (eTable 22).

To assess carry-over effects from the exposure of the first pregnancy to the outcome of the second pregnancy, we stratified by exposure status of the first sibling in a cohort of families with only two siblings (1,2). The crude HR was estimated among all two sibling families for comparison to the full sibling population result to ensure this subset is generalizable to the main sibling results. Crude hazard ratios were estimated for families where the first sibling was exposed to antidepressants in utero and in families where the first sibling was unexposed to antidepressants in utero (eTable 17). We do not present adjusted HRs because the reduced size of the stratified cohorts resulted in convergence issues when additional covariates were added to the model. If a carry-over effect was present, the crude HR would be higher among families with the first sibling unexposed than families with the first sibling exposed because families with the first sibling unexposed are not subject to a carry-over effect of antidepressant exposure (2). Results of the sibling analysis stratified by sibling exposure timing are not suggestive of carry-over effects. Crude HRs are similar or higher in the families with the first sibling exposed to antidepressants than in families with the first sibling unexposed for nearly all the NDD outcomes.

eTable 1. Outcome definitions for neurodevelopmental disorders

| <b>Outcome</b>                                                                  | <b>Algorithm<sup>1,2</sup></b>                                                                                                                                                                                               |
|---------------------------------------------------------------------------------|------------------------------------------------------------------------------------------------------------------------------------------------------------------------------------------------------------------------------|
| Autism Spectrum Disorder/Pervasive Developmental Disorder                       | At ≥ 1 year of age:<br>≥ 2 dates with ICD-9 Dx 299.xx<br>(except 299.1x)                                                                                                                                                     |
| Attention Deficit Hyperactivity Disorder/<br>Hyperkinetic Syndrome of Childhood | At ≥ 2 years of age, any of the following:<br>≥ 2 dates with ICD-9 Dx 314.xx<br>≥ 2 dispensings of atomoxetine, clonidine, guanfacine,<br>(dextro/lisdex)amphetamine, (dex)methylphenidate<br>≥ 1 Dx 314.xx & ≥ 1 dispensing |
| Specific learning disorders                                                     | At ≥ 2 years of age: ≥ 1 ICD-9 Dx 315.0x, 315.1, 315.2                                                                                                                                                                       |
| Developmental Speech or Language Disorder                                       | At ≥ 1.5 years of age: ≥ 2 dates with ICD-9 Dx 315.3x (except 315.34)                                                                                                                                                        |
| Intellectual disability                                                         | At ≥ 2 years of age: ≥ 2 dates with ICD-9 Dx 317, 318.x, 319                                                                                                                                                                 |
| Developmental Coordination Disorder                                             | ≥ 2 dates with ICD-9 Dx 315.4 (any age)                                                                                                                                                                                      |
| Behavioral Disorder                                                             | At ≥ 2 years of age: ≥ 2 dates with ICD-9 Dx 312.xx, 313.xx                                                                                                                                                                  |
| Any Specific Neurodevelopmental Disorder                                        | Presence of any of the outcomes above                                                                                                                                                                                        |
| Abbreviations: Dx, diagnosis; ICD, International Classification of Disease.     |                                                                                                                                                                                                                              |

<sup>1</sup>Straub L, Bateman BT, Hernandez-Diaz S, et al. Validity of claims-based algorithms to identify neurodevelopmental disorders in children. *Pharmacoepidemiol Drug Saf*. Epub ahead of print. doi:10.1002/pds.5369

<sup>2</sup>For outcomes requiring more than one diagnosis date, the first date of diagnosis that occurred after the minimum age was met was used as the outcome date.

eTable 2. Full list of covariates included in propensity score models and assessment periods

| <b>Category</b>                                        | <b>Variables</b>                                                                                                                                                                                                                                                                                                                                                                                                                                                                                                                                                                                                                                               | <b>Assessment window</b>                                |
|--------------------------------------------------------|----------------------------------------------------------------------------------------------------------------------------------------------------------------------------------------------------------------------------------------------------------------------------------------------------------------------------------------------------------------------------------------------------------------------------------------------------------------------------------------------------------------------------------------------------------------------------------------------------------------------------------------------------------------|---------------------------------------------------------|
| Demographics                                           | Age, race/ethnicity (MAX only), state, and delivery year                                                                                                                                                                                                                                                                                                                                                                                                                                                                                                                                                                                                       | At delivery                                             |
| Antidepressant indications                             | Depression (psychotic), depression (nonpsychotic), depression (other), anxiety, ADHD, other developmental disorders, other mental health disorders, bipolar disorder, schizophrenia/schizoaffective disorder, behavioral disorder, personality disorder, adjustment disorder, psychosis, sleep disorder, epilepsy/convulsion, migraine/headache, chronic fatigue                                                                                                                                                                                                                                                                                               | 90 days prior to LMP through the day prior to delivery  |
| Proxies for severity of mental health conditions       | Number of psychiatric visits, number of mental health diagnoses, number of mental health hospitalizations, number of mental health emergency room visits, number of hospitalizations, number of other psychotropic (not antidepressants) medications                                                                                                                                                                                                                                                                                                                                                                                                           | 90 days prior to delivery through 126 days of gestation |
| Lifestyle factors                                      | Smoking, alcohol abuse, substance abuse, poor nutrition, hyperemesis/nausea and vomiting in pregnancy                                                                                                                                                                                                                                                                                                                                                                                                                                                                                                                                                          | 90 days prior to LMP through the day prior to delivery  |
| Other psychotropic medication use                      | Benzodiazepines, other hypnotics, barbiturates, anxiolytics, anticonvulsants, antipsychotics, psychostimulants                                                                                                                                                                                                                                                                                                                                                                                                                                                                                                                                                 | 90 days prior to LMP through the day prior to delivery  |
| Comorbidities                                          | Overweight/obesity, Obstetric comorbidity index, pregestational diabetes, pregestational hypertension, renal disease, autoimmune disorder, asthma, TORCH infection, influenza infection, other sexually transmitted infections, GBS infection                                                                                                                                                                                                                                                                                                                                                                                                                  | 90 days prior to LMP through the day prior to delivery  |
| Other medications                                      | Antidiabetics, insulin, antihypertensives, opioids, opioid use disorder treatment, triptans, NSAIDs, corticosteroids, progestins, prenatal folate, suspected teratogens, known teratogens<br>Suspected teratogens includes: fluconazole, methimazole, danazol, propylthiouracil, aminoglycosides, folic acid, antagonists trimethoprim, triamterene, sulfasalazine, spasmophen, cholestyramine, potassium iodide, tetracycline<br>Known teratogens includes: warfarin, actinomycin, busulfan, chlorambucil, colchicine, cyclophosphamide, doxorubicin, mercaptopurine, methotrexate, vinblastine, vincristine, lithium, isotretinoin, misoprostol, thalidomide | 90 days prior to LMP through the day prior to delivery  |
| Prenatal variables                                     | Adequacy of prenatal care index, month of prenatal care start, prenatal vitamin use, multiple gestation pregnancy, parity (MAX only)                                                                                                                                                                                                                                                                                                                                                                                                                                                                                                                           | 90 days prior to LMP through the day prior to delivery  |
| County-level socioeconomic level indicators (MAX only) | Metropolitan area (metro, non-metro, rural), unemployment level, poverty level, high school education level<br>Note: These measures were defined using zip code, which was missing for <1% of the cohort. Therefore, a complete case analysis was completed for adjusted analyses.                                                                                                                                                                                                                                                                                                                                                                             | Based on zip code at LMP                                |

eTable 3. Hazard ratios and 95% confidence intervals for antidepressant use in late pregnancy and neurodevelopmental disorders for the main analysis and sensitivity analyses, by data source

| Analysis                                       | MAX                     |                       |                   | MarketScan              |                       |                   | Pooled                  |                       |                   |
|------------------------------------------------|-------------------------|-----------------------|-------------------|-------------------------|-----------------------|-------------------|-------------------------|-----------------------|-------------------|
|                                                | Events/<br>N<br>exposed | Events/<br>N referent | HR (95% CI)       | Events/<br>N<br>exposed | Events/<br>N referent | HR (95% CI)       | Events/<br>N<br>exposed | Events/<br>N referent | HR (95% CI)       |
| <b>ASD</b>                                     |                         |                       |                   |                         |                       |                   |                         |                       |                   |
| Crude                                          | 790/<br>93,069          | 8,293/<br>1,833,927   | 1.88 (1.75, 2.03) | 245/<br>52,633          | 3,349/<br>1,198,818   | 1.58 (1.39, 1.80) | 1,035/<br>145,702       | 11,642/<br>3,032,745  | 1.81 (1.69, 1.92) |
| Adjusted                                       | 765/<br>91,412          | 8,095/<br>1,802,442   | 1.06 (0.95, 1.19) | 244/<br>52,585          | 3,348/<br>1,198,385   | 1.06 (0.88, 1.27) | 1,009/<br>143,997       | 11,443/<br>3,000,827  | 1.06 (0.96, 1.17) |
| HDPS <sup>2</sup>                              | 764/<br>91,400          | 6,444/<br>1,442,312   | 1.07 (0.95, 1.21) | 244/<br>52,571          | 3,346/<br>1,198,210   | 1.06 (0.89, 1.26) | 1,008/<br>143,971       | 9,790/<br>2,640,522   | 1.07 (0.97, 1.18) |
| Discontinuer referent                          | 766/<br>91,422          | 273/<br>39,613        | 1.13 (0.96, 1.33) | 244/<br>52,564          | 76/<br>17,258         | 0.94 (0.71, 1.25) | 1,010/<br>143,986       | 349/<br>56,871        | 1.08 (0.94, 1.24) |
| ≥2 fills of ADs                                | 466/<br>51,919          | 8,092/<br>1,800,476   | 1.05 (0.91, 1.21) | 188/<br>37,079          | 3,348/<br>1,198,306   | 1.14 (0.93, 1.39) | 654/<br>88,998          | 11,440/<br>2,998,782  | 1.08 (0.96, 1.21) |
| <b>ADHD</b>                                    |                         |                       |                   |                         |                       |                   |                         |                       |                   |
| Crude                                          | 4,488/<br>93,069        | 47,996/<br>1,833,927  | 2.01 (1.95, 2.07) | 681/<br>52,633          | 6,964/<br>1,198,818   | 2.08 (1.92, 2.25) | 5,169/<br>145,702       | 54,960/<br>3,032,745  | 2.02 (1.96, 2.08) |
| Adjusted                                       | 4,267/<br>91,412        | 45,483/<br>1,802,442  | 1.15 (1.10, 1.21) | 679/<br>52,585          | 6,952/<br>1,198,385   | 1.46 (1.32, 1.62) | 4,946/<br>143,997       | 52,435/<br>3,000,827  | 1.20 (1.15, 1.25) |
| HDPS <sup>2</sup>                              | 4,266/<br>91,400        | 36,354/<br>1,442,312  | 1.14 (1.08, 1.20) | 679/<br>52,571          | 6,952/<br>1,198,210   | 1.42 (1.28, 1.57) | 4,945/<br>143,971       | 43,306/<br>2,640,522  | 1.19 (1.13, 1.24) |
| Discontinuer referent                          | 4,268/<br>91,422        | 1,571/<br>39,613      | 1.05 (0.98, 1.13) | 677/<br>52,564          | 195/<br>17,258        | 1.03 (0.87, 1.23) | 4,945/<br>143,986       | 1,766/<br>56,871      | 1.05 (0.98, 1.12) |
| ≥2 fills of ADs                                | 2,404/<br>51,919        | 45,470/<br>1,800,476  | 1.11 (1.04, 1.17) | 492/<br>37,079          | 6,951/<br>1,198,306   | 1.46 (1.30, 1.64) | 2,896/<br>88,998        | 52,421/<br>2,998,782  | 1.17 (1.11, 1.23) |
| <b>Specific learning disorders</b>             |                         |                       |                   |                         |                       |                   |                         |                       |                   |
| Crude                                          | 325/<br>93,069          | 4,932/<br>1,833,927   | 1.33 (1.18, 1.49) | 52/<br>52,633           | 823/<br>1,198,818     | 1.30 (0.98, 1.72) | 377/<br>145,702         | 5,755/<br>3,032,745   | 1.32 (1.19, 1.47) |
| Adjusted                                       | 320/<br>91,412          | 4,803/<br>1,802,442   | 1.02 (0.87, 1.20) | 52/<br>52,585           | 822/<br>1,198,385     | 0.95 (0.67, 1.35) | 372/<br>143,997         | 5,625/<br>3,000,827   | 1.01 (0.87, 1.17) |
| HDPS <sup>2</sup>                              | 320/<br>91,400          | 3,856/<br>1,442,312   | 1.01 (0.85, 1.20) | 52/<br>52,571           | 822/<br>1,198,210     | 1.00 (0.71, 1.40) | 372/<br>143,971         | 4,678/<br>2,640,522   | 1.01 (0.86, 1.17) |
| Discontinuer referent                          | 320/<br>91,422          | 147/<br>39,613        | 0.80 (0.64, 1.00) | 52/<br>52,564           | 15/<br>17,258         | 0.97 (0.51, 1.82) | 372/<br>143,986         | 162/<br>56,871        | 0.82 (0.66, 1.01) |
| ≥2 fills of ADs                                | 173/<br>51,919          | 4,801/<br>1,800,476   | 0.93 (0.75, 1.14) | 38/<br>37,079           | 822/<br>1,198,306     | 0.96 (0.65, 1.42) | 211/<br>88,998          | 5,623/<br>2,998,782   | 0.94 (0.78, 1.13) |
| <b>Developmental speech/language disorders</b> |                         |                       |                   |                         |                       |                   |                         |                       |                   |
| Crude                                          | 4,058/<br>93,069        | 49,765/<br>1,833,927  | 1.63 (1.58, 1.68) | 1,223/<br>52,633        | 18,101/<br>1,198,818  | 1.50 (1.42, 1.59) | 5,281/<br>145,702       | 67,866/<br>3,032,745  | 1.60 (1.55, 1.65) |

|                                             |                  |                       |                   |                  |                      |                   |                    |                       |                                |
|---------------------------------------------|------------------|-----------------------|-------------------|------------------|----------------------|-------------------|--------------------|-----------------------|--------------------------------|
| Adjusted                                    | 3,954/<br>91,412 | 48,659/<br>1,802,442  | 1.10 (1.04, 1.15) | 1,220/<br>52,585 | 18,090/<br>1,198,385 | 1.19 (1.10, 1.29) | 5,174/<br>143,997  | 66,749/<br>3,000,827  | 1.12 (1.07, 1.17)              |
| HDPS <sup>2</sup>                           | 3,956/<br>91,400 | 38,933/<br>1,442,312  | 1.10 (1.04, 1.15) | 1,221/<br>52,571 | 18,083/<br>1,198,210 | 1.18 (1.09, 1.28) | 5,177/<br>143,971  | 57,016/<br>2,640,522  | 1.12 (1.07, 1.17)              |
| Discontinuer referent                       | 3,958/<br>91,422 | 1,378/<br>39,613      | 1.10 (1.02, 1.19) | 1,220/<br>52,564 | 307/<br>17,258       | 1.25 (1.08, 1.44) | 5,178/<br>143,986  | 1,685/<br>56,871      | 1.13 (1.06, 1.21)              |
| ≥2 fills of ADs                             | 2,401/<br>51,919 | 48,658/<br>1,800,476  | 1.14 (1.07, 1.21) | 870/<br>37,079   | 18,090/<br>1,198,306 | 1.19 (1.09, 1.30) | 3,271/<br>88,998   | 66,748/<br>2,998,782  | 1.15 (1.10, 1.21)              |
| <b>Developmental coordination disorders</b> |                  |                       |                   |                  |                      |                   |                    |                       |                                |
| Crude                                       | 501/<br>93,069   | 7,396/<br>1,833,927   | 1.34 (1.22, 1.46) | 265/<br>52,633   | 3,169/<br>1,198,818  | 1.86 (1.64, 2.11) | 766/<br>145,702    | 10,565/<br>3,032,745  | 1.50 (1.39, 1.61)              |
| Adjusted                                    | 486/<br>91,412   | 7,305/<br>1,802,442   | 1.06 (0.94, 1.20) | 265/<br>52,585   | 3,164/<br>1,198,385  | 1.37 (1.15, 1.63) | 751/<br>143,997    | 10,469/<br>3,000,827  | 1.15 (1.04, 1.27)              |
| HDPS <sup>2</sup>                           | 486/<br>91,400   | 5,846/<br>1,442,312   | 1.06 (0.93, 1.20) | 265/<br>52,571   | 3,162/<br>1,198,210  | 1.37 (1.14, 1.65) | 751/<br>143,971    | 9,008/<br>2,640,522   | 1.15 (1.03, 1.28)              |
| Discontinuer referent                       | 486/<br>91,422   | 163/<br>39,613        | 1.05 (0.85, 1.31) | 265/<br>52,564   | 53/<br>17,258        | 1.84 (1.34, 2.53) | 751/<br>143,986    | 216/<br>56,871        | 1.26 (1.05, 1.51)              |
| ≥2 fills of ADs                             | 320/<br>51,919   | 7,305/<br>1,800,476   | 1.16 (1.01, 1.34) | 192/<br>37,079   | 3,164/<br>1,198,306  | 1.38 (1.13, 1.68) | 512/<br>88,998     | 10,469/<br>2,998,782  | 1.23 (1.10, 1.38)              |
| <b>Intellectual disability</b>              |                  |                       |                   |                  |                      |                   |                    |                       |                                |
| Crude                                       | 209 /<br>93,069  | 2,930/<br>1,833,927   | 1.42 (1.23, 1.63) | 1/<br>52,633     | 81/<br>1,198,818     | 0.26 (0.04, 1.85) | 210/<br>145,702    | 3,011/<br>3,032,745   | 1.41 (1.22, 1.62)              |
| Adjusted                                    | 207/<br>91,412   | 2,875/<br>1,802,442   | 0.97 (0.79, 1.19) | 1/<br>52,585     | 81/<br>1,198,385     | 0.09 (0.01, 0.93) | 208/<br>143,997    | 2,956/<br>3,000,827   | 0.95 (0.78, 1.16)              |
| HDPS <sup>2</sup>                           | 207/<br>91,400   | 2,290/<br>1,442,312   | 1.04 (0.85, 1.27) | 1/<br>52,571     | 81/<br>1,198,210     | 0.18 (0.02, 1.41) | 208/<br>143,971    | 2,371/<br>2,640,522   | 1.02 (0.84, 1.25)              |
| Discontinuer referent                       | 207/<br>91,422   | 90/<br>39,613         | 0.99 (0.74, 1.33) | 1/<br>52,564     | 3/<br>17,258         | 0.08 (0.01, 0.81) | 208/<br>143,986    | 93/<br>56,871         | 0.95 (0.71, 1.28)              |
| ≥2 fills of ADs                             | 120/<br>51,919   | 2,878/<br>1,800,476   | 0.93 (0.72, 1.19) | 0/<br>37,079     | 81/<br>1,198,306     | -                 | 120/<br>51,919     | 2,878/<br>1,800,476   | 0.93 (0.72, 1.19) <sup>1</sup> |
| <b>Behavioral disorder</b>                  |                  |                       |                   |                  |                      |                   |                    |                       |                                |
| Crude                                       | 3,106/<br>93,069 | 33,022/<br>1,833,927  | 1.95 (1.87, 2.02) | 259/<br>52,633   | 2,500/<br>1,198,818  | 2.19 (1.92, 2.49) | 3,365/<br>145,702  | 35,522/<br>3,032,745  | 1.96 (1.89, 2.04)              |
| Adjusted                                    | 2,992/<br>91,412 | 31,707/<br>1,802,442  | 1.13 (1.07, 1.19) | 259/<br>52,585   | 2,498/<br>1,198,385  | 1.34 (1.12, 1.62) | 3,251/<br>143,997  | 34,205/<br>3,000,827  | 1.14 (1.08, 1.21)              |
| HDPS <sup>2</sup>                           | 2,991/<br>91,400 | 25,384/<br>1,442,312  | 1.13 (1.06, 1.20) | 259/<br>52,571   | 2,497/<br>1,198,210  | 1.28 (1.05, 1.55) | 3,250/<br>143,971  | 27,881/<br>2,640,522  | 1.14 (1.08, 1.21)              |
| Discontinuer referent                       | 2,994/<br>91,422 | 1,094/<br>39,613      | 1.07 (0.98, 1.17) | 257/<br>52,564   | 55/<br>17,258        | 1.41 (1.02, 1.95) | 3,251/<br>143,986  | 1,149/<br>56,871      | 1.09 (1.00, 1.18)              |
| ≥2 fills of ADs                             | 1,712/<br>51,919 | 31,692/<br>1,800,476  | 1.11 (1.03, 1.19) | 190/<br>37,079   | 2,498/<br>1,198,306  | 1.37 (1.11, 1.69) | 1,902/<br>88,998   | 34,190/<br>2,998,782  | 1.13 (1.06, 1.21)              |
| <b>Any NDD</b>                              |                  |                       |                   |                  |                      |                   |                    |                       |                                |
| Crude                                       | 9,144/<br>93,069 | 110,036/<br>1,833,927 | 1.77 (1.74, 1.81) | 2,171/<br>52,633 | 28,668/<br>1,198,818 | 1.68 (1.61, 1.76) | 11,315/<br>145,702 | 138,704/<br>3,032,745 | 1.76 (1.72, 1.79)              |

|                       |                  |                       |                   |                  |                      |                   |                    |                       |                   |
|-----------------------|------------------|-----------------------|-------------------|------------------|----------------------|-------------------|--------------------|-----------------------|-------------------|
| Adjusted              | 8,813/<br>91,412 | 106,230/<br>1,802,442 | 1.12 (1.08, 1.15) | 2,166/<br>52,585 | 28,641/<br>1,198,385 | 1.27 (1.20, 1.35) | 10,979/<br>143,997 | 134,871/<br>3,000,827 | 1.15 (1.12, 1.18) |
| HDPS <sup>2</sup>     | 8,812/<br>91,400 | 84,915/<br>1,442,312  | 1.12 (1.08, 1.16) | 2,167/<br>52,571 | 28,632/<br>1,198,210 | 1.26 (1.18, 1.34) | 10,979/<br>143,971 | 113,547/<br>2,640,522 | 1.15 (1.12, 1.19) |
| Discontinuer referent | 8,817/<br>91,422 | 3,214/<br>39,613      | 1.08 (1.03, 1.13) | 2,164/<br>52,564 | 552/<br>17,258       | 1.22 (1.10, 1.36) | 10,981/<br>143,986 | 3,766/<br>56,871      | 1.10 (1.06, 1.15) |
| ≥2 fills of ADs       | 5,140/<br>51,919 | 106,208/<br>1,800,476 | 1.11 (1.07, 1.16) | 1,569/<br>37,079 | 28,640/<br>1,198,306 | 1.29 (1.20, 1.38) | 6,709/<br>88,998   | 134,848/<br>2,998,782 | 1.16 (1.12, 1.20) |

<sup>1</sup>Results include data from MAX only due to 0 exposed cases in MarketScan

<sup>2</sup>The HDPS analysis used an 80% random sample of the unexposed cohort in the MAX data due to sample size constraints in the SAS macro used for HDPS analysis. Results from the crude and primary adjusted analysis using the 80% sample of the referent cohort were very similar to the main results.



eTable 4. Hazard ratios and 95% confidence intervals for antidepressant use in early pregnancy and neurodevelopmental disorders for the main analysis and sensitivity analyses, by data source

| Analysis                                      | MAX                  |                       |                   | MarketScan           |                       |                   | Pooled               |                       |                   |
|-----------------------------------------------|----------------------|-----------------------|-------------------|----------------------|-----------------------|-------------------|----------------------|-----------------------|-------------------|
|                                               | Events/<br>N exposed | Events/<br>N referent | HR (95% CI)       | Events/<br>N exposed | Events/<br>N referent | HR (95% CI)       | Events/<br>N exposed | Events/<br>N referent | HR (95% CI)       |
| <b>ASD</b>                                    |                      |                       |                   |                      |                       |                   |                      |                       |                   |
| Crude                                         | 1,066/<br>129,358    | 8,293/<br>1,833,927   | 1.88 (1.76, 2.00) | 334/<br>69,138       | 3,349/<br>1,198,818   | 1.67 (1.49, 1.87) | 1,400/<br>198,496    | 11,642/<br>3,032,745  | 1.83 (1.73, 1.93) |
| Adjusted                                      | 1,041/<br>126,970    | 8,095/<br>1,802,865   | 1.03 (0.92, 1.15) | 333/<br>69,059       | 3,348/<br>1,198,642   | 1.15 (0.98, 1.36) | 1,374/<br>196,029    | 11,443/<br>3,001,507  | 1.07 (0.97, 1.17) |
| Discontinuer referent                         | 1,043/<br>126,971    | 273/<br>39,619        | 1.03 (0.88, 1.20) | 333/<br>69,099       | 76/<br>17,260         | 0.98 (0.75, 1.28) | 1,376/<br>196,070    | 349/<br>56,879        | 1.03 (0.88, 1.20) |
| <b>ADHD</b>                                   |                      |                       |                   |                      |                       |                   |                      |                       |                   |
| Crude                                         | 5,985/<br>129,358    | 47,996/<br>1,833,927  | 1.99 (1.93, 2.04) | 877/<br>69,138       | 6,964/<br>1,198,818   | 2.10 (1.95, 2.25) | 6,862/<br>198,496    | 54,960/<br>3,032,745  | 2.00 (1.95, 2.05) |
| Adjusted                                      | 5,674/<br>126,970    | 45,480/<br>1,802,865  | 1.10 (1.05, 1.15) | 875/<br>69,059       | 6,964/<br>1,198,642   | 1.46 (1.33, 1.60) | 6,549/<br>196,029    | 52,444/<br>3,001,507  | 1.16 (1.12, 1.21) |
| Discontinuer referent                         | 5,675/<br>126,971    | 1,571/<br>39,619      | 1.03 (0.97, 1.10) | 875/<br>69,099       | 195/<br>17,260        | 1.05 (0.89, 1.24) | 6,550/<br>196,070    | 1,766/<br>56,879      | 1.03 (0.97, 1.10) |
| <b>Specific learning disorders</b>            |                      |                       |                   |                      |                       |                   |                      |                       |                   |
| Crude                                         | 450/<br>129,358      | 4,932/<br>1,833,927   | 1.36 (1.24, 1.50) | 71/<br>69,138        | 823/<br>1,198,818     | 1.39 (1.09, 1.77) | 521/<br>198,496      | 5,755/<br>3,032,745   | 1.37 (1.25, 1.50) |
| Adjusted                                      | 440/<br>126,970      | 4,803/<br>1,802,865   | 1.01 (0.87, 1.18) | 71/<br>69,059        | 823/<br>1,198,642     | 1.04 (0.76, 1.42) | 511/<br>196,029      | 5,626/<br>3,001,507   | 1.02 (0.89, 1.17) |
| Discontinuer referent                         | 442/<br>126,971      | 147/<br>39,619        | 0.81 (0.65, 1.01) | 71/<br>69,099        | 15/<br>17,260         | 0.95 (0.50, 1.79) | 513/<br>196,070      | 162/<br>56,879        | 0.81 (0.65, 1.01) |
| <b>Developmental speech/language disorder</b> |                      |                       |                   |                      |                       |                   |                      |                       |                   |
| Crude                                         | 5,320/<br>129,358    | 49,765/<br>1,833,927  | 1.57 (1.53, 1.62) | 1,476/<br>69,138     | 18,101/<br>1,198,818  | 1.40 (1.32, 1.47) | 6,796/<br>198,496    | 67,866/<br>3,032,745  | 1.53 (1.49, 1.57) |
| Adjusted                                      | 5,189/<br>126,970    | 48,665/<br>1,802,865  | 1.06 (1.02, 1.11) | 1,474/<br>69,059     | 18,098/<br>1,198,642  | 1.10 (1.03, 1.19) | 6,663/<br>196,029    | 66,763/<br>3,001,507  | 1.07 (1.03, 1.12) |
| Discontinuer referent                         | 5,192/<br>126,971    | 1,378/<br>39,619      | 1.06 (0.99, 1.13) | 1,473/<br>69,099     | 308/<br>17,260        | 1.14 (0.99, 1.31) | 6,665/<br>196,070    | 1,686/<br>56,879      | 1.06 (0.99, 1.13) |
| <b>Developmental coordination disorder</b>    |                      |                       |                   |                      |                       |                   |                      |                       |                   |
| Crude                                         | 697/<br>129,358      | 7,396/<br>1,833,927   | 1.36 (1.26, 1.47) | 329/<br>69,138       | 3,169/<br>1,198,818   | 1.77 (1.58, 1.99) | 1,026/<br>198,496    | 10,565/<br>3,032,745  | 1.48 (1.39, 1.58) |
| Adjusted                                      | 686/<br>126,970      | 7,307/<br>1,802,865   | 1.06 (0.94, 1.18) | 329/<br>69,059       | 3,168/<br>1,198,642   | 1.27 (1.08, 1.50) | 1,015/<br>196,029    | 10,475/<br>3,001,507  | 1.12 (1.02, 1.23) |
| Discontinuer referent                         | 687/<br>126,971      | 163/<br>39,619        | 1.08 (0.89, 1.32) | 329/<br>69,099       | 53/<br>17,260         | 1.67 (1.23, 2.26) | 1,016/<br>196,070    | 216/<br>56,879        | 1.08 (0.89, 1.32) |
| <b>Intellectual disability</b>                |                      |                       |                   |                      |                       |                   |                      |                       |                   |
| Crude                                         | 307/<br>129,358      | 2,930/<br>1,833,927   | 1.54 (1.37, 1.74) | 3/<br>69,138         | 81/<br>1,198,818      | 0.60 (0.19, 1.91) | 310/<br>198,496      | 3,011/<br>3,032,745   | 1.53 (1.36, 1.72) |

|                            |                    |                       |                   |                  |                      |                   |                    |                       |                   |
|----------------------------|--------------------|-----------------------|-------------------|------------------|----------------------|-------------------|--------------------|-----------------------|-------------------|
| Adjusted                   | 302/<br>126,970    | 2,877/<br>1,802,865   | 1.00 (0.82, 1.21) | 3/<br>69,059     | 81/<br>1,198,642     | 0.29 (0.06, 1.31) | 305/<br>196,029    | 2,958/<br>3,001,507   | 0.98 (0.81, 1.18) |
| Discontinuer referent      | 303/<br>126,971    | 90/<br>39,619         | 1.04 (0.80, 1.37) | 3/<br>69,099     | 3/<br>17,260         | 0.20 (0.04, 1.05) | 306/<br>196,070    | 93/<br>56,879         | 1.04 (0.80, 1.37) |
| <b>Behavioral disorder</b> |                    |                       |                   |                  |                      |                   |                    |                       |                   |
| Crude                      | 4,049/<br>129,358  | 33,022/<br>1,833,927  | 1.87 (1.81, 1.94) | 343/<br>69,138   | 2,500/<br>1,198,818  | 2.26 (2.02, 2.53) | 4,392/<br>198,496  | 35,522/<br>3,032,745  | 1.90 (1.84, 1.96) |
| Adjusted                   | 3,887/<br>126,970  | 31,706/<br>1,802,865  | 1.06 (1.00, 1.12) | 343/<br>69,059   | 2,500/<br>1,198,642  | 1.42 (1.21, 1.68) | 4,230/<br>196,029  | 34,206/<br>3,001,507  | 1.10 (1.04, 1.16) |
| Discontinuer referent      | 3,889/<br>126,971  | 1,094/<br>39,619      | 1.03 (0.95, 1.12) | 343/<br>69,099   | 55/<br>17,260        | 1.48 (1.09, 2.01) | 4,232/<br>196,070  | 1,149/<br>56,879      | 1.03 (0.95, 1.12) |
| <b>Any NDD</b>             |                    |                       |                   |                  |                      |                   |                    |                       |                   |
| Crude                      | 17,354/<br>129,358 | 161,659/<br>1,833,927 | 1.72 (1.69, 1.76) | 2,705/<br>69,138 | 37,648/<br>1,198,818 | 1.62 (1.55, 1.68) | 14,801/<br>198,496 | 138,704/<br>3,032,745 | 1.70 (1.67, 1.73) |
| Adjusted                   | 11,648/<br>126,970 | 106,239/<br>1,802,865 | 1.07 (1.04, 1.10) | 2,701/<br>69,059 | 28,664/<br>1,198,642 | 1.22 (1.16, 1.29) | 14,349/<br>196,029 | 134,903/<br>3,001,507 | 1.10 (1.07, 1.13) |
| Discontinuer referent      | 11,653/<br>126,971 | 3,214/<br>39,619      | 1.04 (0.99, 1.09) | 2,700/<br>69,099 | 553/<br>17,260       | 1.17 (1.06, 1.29) | 14,353/<br>196,070 | 3,767/<br>56,879      | 1.04 (0.99, 1.09) |

eTable 5. Hazard ratios and 95% confidence intervals for SSRI use in late pregnancy and neurodevelopmental disorders, by data source

| Analysis                                       | MAX                  |                       |                   | MarketScan           |                       |                   | Pooled               |                       |                   |
|------------------------------------------------|----------------------|-----------------------|-------------------|----------------------|-----------------------|-------------------|----------------------|-----------------------|-------------------|
|                                                | Events/<br>N exposed | Events/<br>N referent | HR (95% CI)       | Events/<br>N exposed | Events/<br>N referent | HR (95% CI)       | Events/<br>N exposed | Events/<br>N referent | HR (95% CI)       |
| <b>ASD</b>                                     |                      |                       |                   |                      |                       |                   |                      |                       |                   |
| Crude                                          | 618/<br>73,006       | 8,293/<br>1,833,927   | 1.88 (1.73, 2.04) | 208/<br>43,351       | 3,349/<br>1,198,818   | 1.64 (1.43, 1.89) | 826/<br>116,357      | 11,642/<br>3,032,745  | 1.82 (1.69, 1.95) |
| Adjusted                                       | 601/<br>71,791       | 8,095/<br>1,802,527   | 1.06 (0.95, 1.20) | 208/<br>43,319       | 3,348/<br>1,198,380   | 1.12 (0.93, 1.35) | 809/<br>115,110      | 11,443/<br>3,000,907  | 1.08 (0.98, 1.19) |
| AD discontinuer referent                       | 602/<br>71,802       | 273/<br>39,609        | 1.13 (0.96, 1.34) | 208/<br>43,289       | 76/<br>17,257         | 1.00 (0.75, 1.34) | 810/<br>115,091      | 349/<br>56,866        | 1.10 (0.95, 1.27) |
| SSRI discontinuer referent                     | 601/<br>71,777       | 173/<br>26,598        | 1.23 (1.01, 1.50) | 208/<br>43,283       | 48/<br>11,440         | 0.99 (0.70, 1.40) | 809/<br>115,060      | 221/<br>38,038        | 1.17 (0.99, 1.39) |
| <b>ADHD</b>                                    |                      |                       |                   |                      |                       |                   |                      |                       |                   |
| Crude                                          | 3,509/<br>73,006     | 47,996/<br>1,833,927  | 2.00 (1.93, 2.07) | 530/<br>43,351       | 6,964/<br>1,198,818   | 2.00 (1.83, 2.18) | 4,039/<br>116,357    | 54,960/<br>3,032,745  | 2.00 (1.94, 2.07) |
| Adjusted                                       | 3,356/<br>71,791     | 45,482/<br>1,802,527  | 1.15 (1.10, 1.21) | 529/<br>43,319       | 6,952/<br>1,198,380   | 1.42 (1.27, 1.58) | 3,885/<br>115,110    | 52,434/<br>3,000,907  | 1.19 (1.14, 1.25) |
| AD discontinuer referent                       | 3,358/<br>71,802     | 1,571/<br>39,609      | 1.06 (0.98, 1.13) | 527/<br>43,289       | 195/<br>17,257        | 1.00 (0.83, 1.19) | 3,885/<br>115,091    | 1,766/<br>56,866      | 1.05 (0.98, 1.12) |
| SSRI discontinuer referent                     | 3,357/<br>71,777     | 1,017/<br>26,598      | 1.07 (0.99, 1.17) | 526/<br>43,283       | 124/<br>11,440        | 1.06 (0.85, 1.32) | 3,883/<br>115,060    | 1,141/<br>38,038      | 1.07 (0.99, 1.16) |
| <b>Specific learning disorders</b>             |                      |                       |                   |                      |                       |                   |                      |                       |                   |
| Crude                                          | 253/<br>73,006       | 4,932/<br>1,833,927   | 1.31 (1.15, 1.48) | 40/<br>43,351        | 823/<br>1,198,818     | 1.24 (0.90, 1.70) | 293/<br>116,357      | 5,755/<br>3,032,745   | 1.30 (1.15, 1.46) |
| Adjusted                                       | 248/<br>71,791       | 4,803/<br>1,802,527   | 0.98 (0.83, 1.16) | 40/<br>43,319        | 822/<br>1,198,380     | 0.91 (0.62, 1.32) | 288/<br>115,110      | 5,625/<br>3,000,907   | 0.97 (0.83, 1.13) |
| AD discontinuer referent                       | 248/<br>71,802       | 147/<br>39,609        | 0.78 (0.61, 0.98) | 40/<br>43,289        | 15/<br>17,257         | 0.90 (0.47, 1.70) | 288/<br>115,091      | 162/<br>56,866        | 0.79 (0.63, 0.98) |
| SSRI discontinuer referent                     | 248/<br>71,777       | 90/<br>26,598         | 0.80 (0.60, 1.07) | 40/<br>43,283        | 10/<br>11,440         | 0.97 (0.43, 2.19) | 288/<br>115,060      | 100/<br>38,038        | 0.82 (0.62, 1.08) |
| <b>Developmental speech/language disorders</b> |                      |                       |                   |                      |                       |                   |                      |                       |                   |
| Crude                                          | 3,191/<br>73,006     | 49,765/<br>1,833,927  | 1.64 (1.58, 1.70) | 1,001/<br>43,351     | 18,101/<br>1,198,818  | 1.50 (1.41, 1.60) | 4,192/<br>116,357    | 67,866/<br>3,032,745  | 1.60 (1.55, 1.65) |
| Adjusted                                       | 3,114/<br>71,791     | 48,658/<br>1,802,527  | 1.09 (1.04, 1.15) | 999/<br>43,319       | 18,090/<br>1,198,380  | 1.19 (1.10, 1.29) | 4,113/<br>115,110    | 66,748/<br>3,000,907  | 1.12 (1.07, 1.17) |
| AD discontinuer referent                       | 3,116/<br>71,802     | 1,378/<br>39,609      | 1.11 (1.03, 1.20) | 999/<br>43,289       | 307/<br>17,257        | 1.25 (1.08, 1.45) | 4,115/<br>115,091    | 1,685/<br>56,866      | 1.14 (1.06, 1.22) |
| SSRI discontinuer referent                     | 3,115/<br>71,777     | 893/<br>26,598        | 1.13 (1.03, 1.24) | 1,000/<br>43,283     | 201/<br>11,440        | 1.29 (1.08, 1.54) | 4,115/<br>115,060    | 1,094/<br>38,038      | 1.16 (1.07, 1.26) |
| <b>Developmental coordination disorders</b>    |                      |                       |                   |                      |                       |                   |                      |                       |                   |

|                                |                  |                       |                   |                  |                      |                   |                   |                       |                   |
|--------------------------------|------------------|-----------------------|-------------------|------------------|----------------------|-------------------|-------------------|-----------------------|-------------------|
| Crude                          | 387/<br>73,006   | 7,396/<br>1,833,927   | 1.32 (1.19, 1.46) | 228/<br>43,351   | 3,169/<br>1,198,818  | 1.95 (1.70, 2.23) | 615/<br>116,357   | 10,565/<br>3,032,745  | 1.52 (1.40, 1.65) |
| Adjusted                       | 374/<br>71,791   | 7,307/<br>1,802,527   | 1.03 (0.90, 1.17) | 228/<br>43,319   | 3,164/<br>1,198,380  | 1.44 (1.21, 1.73) | 602/<br>115,110   | 10,471/<br>3,000,907  | 1.16 (1.04, 1.28) |
| AD discontinuer referent       | 375/<br>71,802   | 163/<br>39,609        | 1.01 (0.81, 1.28) | 228/<br>43,289   | 53/<br>17,257        | 1.91 (1.38, 2.63) | 603/<br>115,091   | 216/<br>56,866        | 1.26 (1.04, 1.51) |
| SSRI discontinuer referent     | 374/<br>71,777   | 104/<br>26,598        | 1.04 (0.78, 1.39) | 228/<br>43,283   | 32/<br>11,440        | 2.17 (1.43, 3.27) | 602/<br>115,060   | 136/<br>38,038        | 1.32 (1.04, 1.67) |
| <b>Intellectual disability</b> |                  |                       |                   |                  |                      |                   |                   |                       |                   |
| Crude                          | 170/<br>73,006   | 2,930/<br>1,833,927   | 1.47 (1.25, 1.72) | 1/<br>43,351     | 81/<br>1,198,818     | 0.32 (0.04, 2.28) | 171/<br>116,357   | 3,011/<br>3,032,745   | 1.45 (1.24, 1.70) |
| Adjusted                       | 169/<br>71,791   | 2,869/<br>1,802,527   | 0.99 (0.80, 1.22) | 1/<br>43,319     | 81/<br>1,198,380     | 0.16 (0.02, 1.43) | 170/<br>115,110   | 2,950/<br>3,000,907   | 0.97 (0.79, 1.20) |
| AD discontinuer referent       | 169/<br>71,802   | 90/<br>39,609         | 1.06 (0.78, 1.42) | 1/<br>43,289     | 3/<br>17,257         | 0.10 (0.01, 1.04) | 170/<br>115,091   | 93/<br>56,866         | 1.02 (0.76, 1.37) |
| SSRI discontinuer referent     | 169/<br>71,777   | 54/<br>26,598         | 1.01 (0.69, 1.50) | 1/<br>43,283     | 2/<br>11,440         | 0.07 (0.01, 0.81) | 170/<br>115,060   | 56/<br>38,038         | 0.95 (0.64, 1.40) |
| <b>Behavioral disorder</b>     |                  |                       |                   |                  |                      |                   |                   |                       |                   |
| Crude                          | 2,476/<br>73,006 | 33,022/<br>1,833,927  | 1.98 (1.90, 2.06) | 193/<br>43,351   | 2,500/<br>1,198,818  | 2.00 (1.73, 2.32) | 2,669/<br>116,357 | 35,522/<br>3,032,745  | 1.98 (1.90, 2.06) |
| Adjusted                       | 2,396/<br>71,791 | 31,707/<br>1,802,527  | 1.14 (1.08, 1.21) | 193/<br>43,319   | 2,498/<br>1,198,380  | 1.23 (1.01, 1.50) | 2,589/<br>115,110 | 34,205/<br>3,000,907  | 1.15 (1.08, 1.22) |
| AD discontinuer referent       | 2,399/<br>71,802 | 1,094/<br>39,609      | 1.09 (1.00, 1.19) | 191/<br>43,289   | 55/<br>17,257        | 1.30 (0.93, 1.81) | 2,590/<br>115,091 | 1,149/<br>56,866      | 1.10 (1.01, 1.20) |
| SSRI discontinuer referent     | 2,397/<br>71,777 | 730/<br>26,598        | 1.06 (0.95, 1.18) | 191/<br>43,283   | 30/<br>11,440        | 1.61 (1.05, 2.48) | 2,588/<br>115,060 | 760/<br>38,038        | 1.09 (0.98, 1.21) |
| <b>Any NDD</b>                 |                  |                       |                   |                  |                      |                   |                   |                       |                   |
| Crude                          | 7,188/<br>73,006 | 110,036/<br>1,833,927 | 1.78 (1.74, 1.83) | 1,755/<br>43,351 | 28,668/<br>1,198,818 | 1.66 (1.59, 1.75) | 8,943/<br>116,357 | 138,704/<br>3,032,745 | 1.76 (1.72, 1.80) |
| Adjusted                       | 6,956/<br>71,791 | 106,225/<br>1,802,527 | 1.12 (1.08, 1.16) | 1,752/<br>43,319 | 28,641/<br>1,198,380 | 1.27 (1.19, 1.35) | 8,708/<br>115,110 | 134,866/<br>3,000,907 | 1.15 (1.12, 1.19) |
| AD discontinuer referent       | 6,959/<br>71,802 | 3,214/<br>39,609      | 1.09 (1.03, 1.14) | 1,750/<br>43,289 | 552/<br>17,257       | 1.21 (1.09, 1.35) | 8,709/<br>115,091 | 3,766/<br>56,866      | 1.11 (1.06, 1.16) |
| SSRI discontinuer referent     | 6,956/<br>71,777 | 2,085/<br>26,598      | 1.11 (1.04, 1.18) | 1,750/<br>43,283 | 361/<br>11,440       | 1.25 (1.10, 1.43) | 8,706/<br>115,060 | 2,446/<br>38,038      | 1.13 (1.07, 1.20) |

eTable 6. Hazard ratios and 95% confidence intervals for SNRI use in late pregnancy and neurodevelopmental disorders, by data source

| Analysis                                       | MAX                  |                       |                   | MarketScan           |                       |                    | Pooled               |                       |                   |
|------------------------------------------------|----------------------|-----------------------|-------------------|----------------------|-----------------------|--------------------|----------------------|-----------------------|-------------------|
|                                                | Events/<br>N exposed | Events/<br>N referent | HR (95% CI)       | Events/<br>N exposed | Events/<br>N referent | HR (95% CI)        | Events/<br>N exposed | Events/<br>N referent | HR (95% CI)       |
| <b>ASD</b>                                     |                      |                       |                   |                      |                       |                    |                      |                       |                   |
| Crude                                          | 53/<br>5,235         | 8,293/<br>1,833,927   | 2.36 (1.80, 3.10) | 17/<br>3,525         | 3,349/<br>1,198,818   | 1.61 (1.00, 2.59)  | 70/<br>8,760         | 11,642/<br>3,032,745  | 2.15 (1.70, 2.72) |
| Adjusted                                       | 50/<br>5,148         | 7,959/<br>1,730,176   | 1.06 (0.76, 1.48) | 17/<br>3,511         | 3,311/<br>1,179,938   | 0.99 (0.59, 1.66)  | 67/<br>8,659         | 11,270/<br>2,910,114  | 1.04 (0.79, 1.37) |
| AD discontinuer referent                       | 50/<br>5,147         | 270/<br>39,469        | 1.17 (0.82, 1.65) | 17/<br>3,517         | 76/<br>17,207         | 1.04 (0.60, 1.81)  | 67/<br>8,664         | 346/<br>56,676        | 1.13 (0.84, 1.52) |
| SNRI discontinuer ref                          | 49/<br>5,090         | 17/<br>3,245          | 2.63 (1.38, 5.01) | 17/<br>3,450         | 11/<br>1,654          | 0.95 (0.41, 2.19)  | 66/<br>8,540         | 28/<br>4,899          | 1.79 (1.08, 2.99) |
| <b>ADHD</b>                                    |                      |                       |                   |                      |                       |                    |                      |                       |                   |
| Crude                                          | 223/<br>5,235        | 47,996/<br>1,833,927  | 1.90 (1.66, 2.16) | 45/<br>3,525         | 6,964/<br>1,198,818   | 2.05 (1.53, 2.76)  | 268/<br>8,760        | 54,960/<br>3,032,745  | 1.92 (1.70, 2.17) |
| Adjusted                                       | 214/<br>5,148        | 44,158/<br>1,730,176  | 1.03 (0.89, 1.19) | 44/<br>3,511         | 6,929/<br>1,179,938   | 1.31 (0.96, 1.79)  | 258/<br>8,659        | 51,087/<br>2,910,114  | 1.07 (0.94, 1.23) |
| AD discontinuer referent                       | 214/<br>5,147        | 1,567/<br>39,469      | 0.94 (0.80, 1.11) | 44/<br>3,517         | 195/<br>17,207        | 1.02 (0.71, 1.45)  | 258/<br>8,664        | 1,762/<br>56,676      | 0.95 (0.82, 1.11) |
| SNRI discontinuer ref                          | 213/<br>5,090        | 152/<br>3,245         | 0.78 (0.58, 1.04) | 43/<br>3,450         | 19/<br>1,654          | 0.91 (0.50, 1.65)  | 256/<br>8,540        | 171/<br>4,899         | 0.80 (0.61, 1.04) |
| <b>Specific learning disorders</b>             |                      |                       |                   |                      |                       |                    |                      |                       |                   |
| Crude                                          | 22/<br>5,235         | 4,932/<br>1,833,927   | 1.78 (1.17, 2.70) | 5/<br>3,525          | 823/<br>1,198,818     | 1.91 (0.79, 4.62)  | 27/<br>8,760         | 5,755/<br>3,032,745   | 1.80 (1.23, 2.63) |
| Adjusted                                       | 22/<br>5,148         | 4,643/<br>1,730,176   | 1.38 (0.87, 2.19) | 5/<br>3,511          | 815/<br>1,179,938     | 1.45 (0.58, 3.64)  | 27/<br>8,659         | 5,458/<br>2,910,114   | 1.39 (0.92, 2.11) |
| AD discontinuer referent                       | 22/<br>5,147         | 147/<br>39,469        | 1.02 (0.62, 1.69) | 5/<br>3,517          | 15/<br>17,207         | 1.36 (0.44, 4.19)  | 27/<br>8,664         | 162/<br>56,676        | 1.07 (0.67, 1.69) |
| SNRI discontinuer ref                          | 22/<br>5,090         | 15/<br>3,245          | 0.92 (0.43, 1.96) | 5/<br>3,450          | 1/<br>1,654           | 4.68 (0.53, 40.99) | 27/<br>8,540         | 16/<br>4,899          | 1.10 (0.54, 2.24) |
| <b>Developmental speech/language disorders</b> |                      |                       |                   |                      |                       |                    |                      |                       |                   |
| Crude                                          | 260/<br>5,235        | 49,765/<br>1,833,927  | 1.94 (1.72, 2.20) | 97/<br>3,525         | 18,101/<br>1,198,818  | 1.76 (1.44, 2.14)  | 357/<br>8,760        | 67,866/<br>3,032,745  | 1.89 (1.70, 2.10) |
| Adjusted                                       | 249/<br>5,148        | 47,622/<br>1,730,176  | 1.21 (1.05, 1.40) | 96/<br>3,511         | 17,922/<br>1,179,938  | 1.28 (1.02, 1.60)  | 345/<br>8,659        | 65,544/<br>2,910,114  | 1.23 (1.09, 1.39) |
| AD discontinuer referent                       | 249/<br>5,147        | 1,375/<br>39,469      | 1.21 (1.03, 1.41) | 96/<br>3,517         | 305/<br>17,207        | 1.48 (1.14, 1.91)  | 345/<br>8,664        | 1,680/<br>56,676      | 1.27 (1.11, 1.46) |
| SNRI discontinuer ref                          | 246/<br>5,090        | 133/<br>3,245         | 1.22 (0.93, 1.60) | 95/<br>3,450         | 29/<br>1,654          | 1.11 (0.61, 2.04)  | 341/<br>8,540        | 162/<br>4,899         | 1.20 (0.94, 1.54) |
| <b>Developmental coordination disorders</b>    |                      |                       |                   |                      |                       |                    |                      |                       |                   |

|                                |               |                       |                   |               |                      |                    |               |                       |                                |
|--------------------------------|---------------|-----------------------|-------------------|---------------|----------------------|--------------------|---------------|-----------------------|--------------------------------|
| Crude                          | 29/<br>5,235  | 7,396/<br>1,833,927   | 1.41 (0.98, 2.02) | 17/<br>3,525  | 3,169/<br>1,198,818  | 1.76 (1.10, 2.84)  | 46/<br>8,760  | 10,565/<br>3,032,745  | 1.53 (1.15, 2.04)              |
| Adjusted                       | 29/<br>5,148  | 7,229/<br>1,730,176   | 1.10 (0.75, 1.62) | 17/<br>3,511  | 3,134/<br>1,179,938  | 1.24 (0.75, 2.05)  | 46/<br>8,659  | 10,363/<br>2,910,114  | 1.15 (0.85, 1.56)              |
| AD discontinuer referent       | 29/<br>5,147  | 163/<br>39,469        | 1.01 (0.65, 1.56) | 17/<br>3,517  | 53/<br>17,207        | 1.79 (1.00, 3.20)  | 46/<br>8,664  | 216/<br>56,676        | 1.24 (0.87, 1.76)              |
| SNRI discontinuer ref          | 28/<br>5,090  | 19/<br>3,245          | 0.81 (0.40, 1.62) | 16/<br>3,450  | 6/<br>1,654          | 1.55 (0.47, 5.07)  | 44/<br>8,540  | 25/<br>4,899          | 0.95 (0.52, 1.74)              |
| <b>Intellectual disability</b> |               |                       |                   |               |                      |                    |               |                       |                                |
| Crude                          | <11/<br>5,235 | 2,930/<br>1,833,927   | 1.29 (0.70, 2.41) | 0/<br>3,525   | 81/<br>1,198,818     | -                  | <11/<br>5,235 | 2,930/<br>1,833,927   | 1.29 (0.70, 2.41) <sup>1</sup> |
| Adjusted                       | <11/<br>5,148 | 2,748/<br>1,730,176   | 0.80 (0.41, 1.56) | 0/<br>3,511   | 81/<br>1,179,938     | -                  | <11/<br>5,148 | 2,748/<br>1,730,176   | 0.80 (0.41, 1.56) <sup>1</sup> |
| AD discontinuer referent       | <11/<br>5,147 | 90/<br>39,469         | 0.78 (0.37, 1.65) | 0/<br>3,517   | 3/<br>17,207         | -                  | <11/<br>5,147 | 90/<br>39,469         | 0.78 (0.37, 1.65) <sup>1</sup> |
| SNRI discontinuer ref          | <11/<br>5,090 | 11/<br>3,245          | 1.21 (0.47, 3.10) | 0/<br>3,450   | 2/<br>1,654          | -                  | <11/<br>5,090 | 11/<br>3,245          | 1.21 (0.47, 3.10) <sup>1</sup> |
| <b>Behavioral disorder</b>     |               |                       |                   |               |                      |                    |               |                       |                                |
| Crude                          | 170/<br>5,235 | 33,022/<br>1,833,927  | 2.04 (1.75, 2.37) | 26/<br>3,525  | 2,500/<br>1,198,818  | 3.28 (2.24, 4.82)  | 196/<br>8,760 | 35,522/<br>3,032,745  | 2.17 (1.89, 2.49)              |
| Adjusted                       | 162/<br>5,148 | 30,685/<br>1,730,176  | 1.11 (0.94, 1.33) | 26/<br>3,511  | 2,484/<br>1,179,938  | 1.85 (1.17, 2.90)  | 188/<br>8,659 | 33,169/<br>2,910,114  | 1.19 (1.01, 1.40)              |
| AD discontinuer referent       | 162/<br>5,147 | 1,091/<br>39,469      | 1.09 (0.89, 1.32) | 26/<br>3,517  | 55/<br>17,207        | 2.19 (1.32, 3.65)  | 188/<br>8,664 | 1,146/<br>56,676      | 1.19 (0.99, 1.43)              |
| SNRI discontinuer ref          | 162/<br>5,090 | 92/<br>3,245          | 1.15 (0.77, 1.72) | 25/<br>3,450  | 4/<br>1,654          | 3.87 (1.24, 12.10) | 187/<br>8,540 | 96/<br>4,899          | 1.31 (0.90, 1.92)              |
| <b>Any NDD</b>                 |               |                       |                   |               |                      |                    |               |                       |                                |
| Crude                          | 521/<br>5,235 | 110,036/<br>1,833,927 | 1.90 (1.74, 2.08) | 170/<br>3,525 | 28,668/<br>1,198,818 | 1.96 (1.68, 2.27)  | 691/<br>8,760 | 138,704/<br>3,032,745 | 1.92 (1.78, 2.07)              |
| Adjusted                       | 498/<br>5,148 | 103,344/<br>1,730,176 | 1.12 (1.01, 1.23) | 168/<br>3,511 | 28,399/<br>1,179,938 | 1.36 (1.15, 1.62)  | 666/<br>8,659 | 131,743/<br>2,910,114 | 1.18 (1.08, 1.28)              |
| AD discontinuer referent       | 498/<br>5,147 | 3,207/<br>39,469      | 1.07 (0.96, 1.20) | 168/<br>3,517 | 550/<br>17,207       | 1.44 (1.19, 1.74)  | 666/<br>8,664 | 3,757/<br>56,676      | 1.15 (1.05, 1.27)              |
| SNRI discontinuer ref          | 493/<br>5,090 | 301/<br>3,245         | 0.99 (0.82, 1.20) | 165/<br>3,450 | 53/<br>1,654         | 1.24 (0.81, 1.90)  | 658/<br>8,540 | 354/<br>4,899         | 1.03 (0.86, 1.22)              |

<sup>1</sup>Results include data from MAX only due to 0 exposed cases in MarketScan  
Event counts are obscured when <11 in MAX due to the CMS cell size suppression policy.

eTable 7. Hazard ratios and 95% confidence intervals for TCA use in late pregnancy and neurodevelopmental disorders, by data source

| Analysis                                       | MAX                  |                       |                   | MarketScan           |                       |                   | Pooled               |                       |                                |
|------------------------------------------------|----------------------|-----------------------|-------------------|----------------------|-----------------------|-------------------|----------------------|-----------------------|--------------------------------|
|                                                | Events/<br>N exposed | Events/<br>N referent | HR (95% CI)       | Events/<br>N exposed | Events/<br>N referent | HR (95% CI)       | Events/<br>N exposed | Events/<br>N referent | HR (95% CI)                    |
| <b>ASD</b>                                     |                      |                       |                   |                      |                       |                   |                      |                       |                                |
| Crude                                          | 27/<br>3,606         | 8,293/<br>1,833,927   | 1.57 (1.08, 2.28) | 3/<br>848            | 3,349/<br>1,198,818   | 1.16 (0.38, 3.55) | 30/<br>4,454         | 11,642/<br>3,032,745  | 1.52 (1.06, 2.17)              |
| Adjusted                                       | 27/<br>3,511         | 8,080/<br>1,789,773   | 0.88 (0.60, 1.31) | 3/<br>846            | 3,314/<br>1,176,215   | 0.58 (0.18, 1.85) | 30/<br>4,357         | 11,394/<br>2,965,988  | 0.84 (0.58, 1.23)              |
| AD discontinuer referent                       | 27/<br>3,511         | 269/<br>39,230        | 0.94 (0.61, 1.45) | 3/<br>841            | 76/<br>16,597         | 0.46 (0.14, 1.54) | 30/<br>4,352         | 345/<br>55,827        | 0.86 (0.57, 1.30)              |
| TCA discontinuer ref                           | 27/<br>3,494         | 24/<br>4,258          | 1.54 (0.84, 2.81) | 3/<br>813            | 10/<br>1,452          | 0.19 (0.05, 0.83) | 30/<br>4,307         | 34/<br>5,710          | 1.14 (0.65, 1.98)              |
| <b>ADHD</b>                                    |                      |                       |                   |                      |                       |                   |                      |                       |                                |
| Crude                                          | 177/<br>3,606        | 47,996/<br>1,833,927  | 1.79 (1.54, 2.08) | 9/<br>848            | 6,964/<br>1,198,818   | 1.42 (0.74, 2.73) | 186/<br>4,454        | 54,960/<br>3,032,745  | 1.77 (1.53, 2.05)              |
| Adjusted                                       | 165/<br>3,511        | 45,436/<br>1,789,773  | 1.01 (0.86, 1.19) | 9/<br>846            | 6,925/<br>1,176,215   | 0.96 (0.50, 1.86) | 174/<br>4,357        | 52,361/<br>2,965,988  | 1.01 (0.86, 1.18)              |
| AD discontinuer referent                       | 165/<br>3,511        | 1,566/<br>39,230      | 0.96 (0.81, 1.14) | 8/<br>841            | 193/<br>16,597        | 0.52 (0.24, 1.11) | 173/<br>4,352        | 1,759/<br>55,827      | 0.93 (0.79, 1.10)              |
| TCA discontinuer ref                           | 164/<br>3,494        | 167/<br>4,258         | 1.10 (0.84, 1.44) | 8/<br>813            | 13/<br>1,452          | 0.89 (0.32, 2.47) | 172/<br>4,307        | 180/<br>5,710         | 1.08 (0.83, 1.41)              |
| <b>Specific learning disorders</b>             |                      |                       |                   |                      |                       |                   |                      |                       |                                |
| Crude                                          | 13/<br>3,606         | 4,932/<br>1,833,927   | 1.19 (0.69, 2.05) | 0/<br>848            | 823/<br>1,198,818     | -                 | 13/<br>3,606         | 4,932/<br>1,833,927   | 1.19 (0.69, 2.05) <sup>1</sup> |
| Adjusted                                       | 13/<br>3,511         | 4,797/<br>1,789,773   | 1.03 (0.59, 1.81) | 0/<br>846            | 815/<br>1,176,215     | -                 | 13/<br>3,511         | 4,797/<br>1,789,773   | 1.03 (0.59, 1.81) <sup>1</sup> |
| AD discontinuer referent                       | 13/<br>3,511         | 145/<br>39,230        | 0.86 (0.48, 1.57) | 0/<br>841            | 15/<br>16,597         | -                 | 13/<br>3,511         | 145/<br>39,230        | 0.86 (0.48, 1.57) <sup>1</sup> |
| TCA discontinuer ref                           | 13/<br>3,494         | 21/<br>4,258          | 0.82 (0.39, 1.72) | 0/<br>813            | 1/<br>1,452           | -                 | 13/<br>3,494         | 21/<br>4,258          | 0.82 (0.39, 1.72) <sup>1</sup> |
| <b>Developmental speech/language disorders</b> |                      |                       |                   |                      |                       |                   |                      |                       |                                |
| Crude                                          | 144/<br>3,606        | 49,765/<br>1,833,927  | 1.42 (1.21, 1.68) | 25/<br>848           | 18,101/<br>1,198,818  | 1.88 (1.27, 2.79) | 169/<br>4,454        | 67,866/<br>3,032,745  | 1.48 (1.27, 1.73)              |
| Adjusted                                       | 141/<br>3,511        | 48,531/<br>1,789,773  | 1.04 (0.87, 1.23) | 25/<br>846           | 17,863/<br>1,176,215  | 1.36 (0.90, 2.05) | 166/<br>4,357        | 66,394/<br>2,965,988  | 1.08 (0.92, 1.27)              |
| AD discontinuer referent                       | 141/<br>3,511        | 1,366/<br>39,230      | 0.98 (0.81, 1.19) | 24/<br>841           | 298/<br>16,597        | 1.50 (0.96, 2.37) | 165/<br>4,352        | 1,664/<br>55,827      | 1.05 (0.88, 1.25)              |
| TCA discontinuer ref                           | 140/<br>3,494        | 167/<br>4,258         | 0.93 (0.71, 1.22) | 23/<br>813           | 27/<br>1,452          | 0.94 (0.44, 2.02) | 163/<br>4,307        | 194/<br>5,710         | 0.93 (0.73, 1.20)              |
| <b>Developmental coordination disorders</b>    |                      |                       |                   |                      |                       |                   |                      |                       |                                |

|                                |               |                       |                   |            |                      |                    |               |                       |                                |
|--------------------------------|---------------|-----------------------|-------------------|------------|----------------------|--------------------|---------------|-----------------------|--------------------------------|
| Crude                          | 19/<br>3,606  | 7,396/<br>1,833,927   | 1.28 (0.81, 2.00) | 2/<br>848  | 3,169/<br>1,198,818  | 0.86 (0.22, 3.39)  | 21/<br>4,454  | 10,565/<br>3,032,745  | 1.23 (0.80, 1.88)              |
| Adjusted                       | 17/<br>3,511  | 7,281/<br>1,789,773   | 0.97 (0.60, 1.59) | 2/<br>846  | 3,116/<br>1,176,215  | 0.55 (0.14, 2.19)  | 19/<br>4,357  | 10,397/<br>2,965,988  | 0.91 (0.58, 1.45)              |
| AD discontinuer referent       | 17/<br>3,511  | 159/<br>39,230        | 0.92 (0.54, 1.56) | 2/<br>841  | 51/<br>16,597        | 0.76 (0.17, 3.49)  | 19/<br>4,352  | 210/<br>55,827        | 0.90 (0.55, 1.49)              |
| TCA discontinuer ref           | 17/<br>3,494  | 22/<br>4,258          | 0.66 (0.29, 1.48) | 2/<br>813  | 4/<br>1,452          | 1.63 (0.25, 10.52) | 19/<br>4,307  | 26/<br>5,710          | 0.76 (0.36, 1.60)              |
| <b>Intellectual disability</b> |               |                       |                   |            |                      |                    |               |                       |                                |
| Crude                          | <11/<br>3,606 | 2,930/<br>1,833,927   | 0.79 (0.33, 1.90) | 0/<br>848  | 81/<br>1,198,818     | -                  | <11/<br>3,606 | 2,930/<br>1,833,927   | 0.79 (0.33, 1.90) <sup>1</sup> |
| Adjusted                       | <11/<br>3,511 | 2,852/<br>1,789,773   | 0.52 (0.21, 1.27) | 0/<br>846  | 81/<br>1,176,215     | -                  | <11/<br>3,511 | 2,852/<br>1,789,773   | 0.52 (0.21, 1.27) <sup>1</sup> |
| AD discontinuer referent       | <11/<br>3,511 | 88/<br>39,230         | 0.55 (0.22, 1.39) | 0/<br>841  | 3/<br>16,597         | -                  | <11/<br>3,511 | 88/<br>39,230         | 0.55 (0.22, 1.39) <sup>1</sup> |
| TCA discontinuer ref           | <11/<br>3,494 | <11/<br>4,258         | 0.95 (0.29, 3.16) | 0/<br>813  | 0/<br>1,452          | -                  | <11/<br>3,494 | <11/<br>4,258         | 0.95 (0.29, 3.16) <sup>1</sup> |
| <b>Behavioral disorder</b>     |               |                       |                   |            |                      |                    |               |                       |                                |
| Crude                          | 103/<br>3,606 | 33,022/<br>1,833,927  | 1.48 (1.22, 1.80) | 4/<br>848  | 2,500/<br>1,198,818  | 1.90 (0.71, 5.12)  | 107/<br>4,454 | 35,522/<br>3,032,745  | 1.50 (1.24, 1.81)              |
| Adjusted                       | 98/<br>3,511  | 31,651/<br>1,789,773  | 0.87 (0.71, 1.07) | 4/<br>846  | 2,480/<br>1,176,215  | 1.13 (0.42, 3.06)  | 102/<br>4,357 | 34,131/<br>2,965,988  | 0.88 (0.72, 1.08)              |
| AD discontinuer referent       | 98/<br>3,511  | 1,089/<br>39,230      | 0.86 (0.69, 1.07) | 3/<br>841  | 55/<br>16,597        | 0.71 (0.20, 2.56)  | 101/<br>4,352 | 1,144/<br>55,827      | 0.86 (0.69, 1.06)              |
| TCA discontinuer ref           | 98/<br>3,494  | 111/<br>4,258         | 0.94 (0.63, 1.40) | 3/<br>813  | 9/<br>1,452          | 0.39 (0.08, 1.81)  | 101/<br>4,307 | 120/<br>5,710         | 0.89 (0.60, 1.31)              |
| <b>Any NDD</b>                 |               |                       |                   |            |                      |                    |               |                       |                                |
| Crude                          | 335/<br>3,606 | 110,036/<br>1,833,927 | 1.53 (1.37, 1.71) | 36/<br>848 | 28,668/<br>1,198,818 | 1.64 (1.18, 2.28)  | 371/<br>4,454 | 138,704/<br>3,032,745 | 1.54 (1.39, 1.71)              |
| Adjusted                       | 318/<br>3,511 | 105,985/<br>1,789,773 | 0.98 (0.87, 1.10) | 36/<br>846 | 28,328/<br>1,176,215 | 1.11 (0.79, 1.56)  | 354/<br>4,357 | 134,313/<br>2,965,988 | 0.99 (0.89, 1.10)              |
| AD discontinuer referent       | 318/<br>3,511 | 3,192/<br>39,230      | 0.92 (0.81, 1.04) | 35/<br>841 | 540/<br>16,597       | 1.01 (0.69, 1.48)  | 353/<br>4,352 | 3,732/<br>55,827      | 0.93 (0.82, 1.05)              |
| TCA discontinuer ref           | 316/<br>3,494 | 367/<br>4,258         | 0.94 (0.77, 1.14) | 34/<br>813 | 45/<br>1,452         | 1.03 (0.55, 1.92)  | 350/<br>4,307 | 412/<br>5,710         | 0.95 (0.79, 1.14)              |

<sup>1</sup>Results include data from MAX only due to 0 exposed cases in MarketScan  
Event counts are obscured when <11 in MAX due to the CMS cell size suppression policy.



eTable 8. Hazard ratios and 95% confidence intervals for sertraline use in late pregnancy and neurodevelopmental disorders, by data source

| Analysis                                       | MAX                  |                       |                   | MarketScan           |                       |                   | Pooled               |                       |                   |
|------------------------------------------------|----------------------|-----------------------|-------------------|----------------------|-----------------------|-------------------|----------------------|-----------------------|-------------------|
|                                                | Events/<br>N exposed | Events/<br>N referent | HR (95% CI)       | Events/<br>N exposed | Events/<br>N referent | HR (95% CI)       | Events/<br>N exposed | Events/<br>N referent | HR (95% CI)       |
| <b>ASD</b>                                     |                      |                       |                   |                      |                       |                   |                      |                       |                   |
| Crude                                          | 246/<br>33,567       | 8,293/<br>1,833,927   | 1.74 (1.53, 1.97) | 84/<br>22,787        | 3,349/<br>1,198,818   | 1.29 (1.04, 1.60) | 330/<br>56,354       | 11,642/<br>3,032,745  | 1.61 (1.44, 1.80) |
| Adjusted                                       | 240/<br>33,012       | 8,089/<br>1,797,902   | 1.03 (0.88, 1.19) | 84/<br>22,776        | 3,348/<br>1,198,393   | 0.92 (0.72, 1.17) | 324/<br>55,788       | 11,437/<br>2,996,295  | 0.99 (0.88, 1.13) |
| AD discontinuer referent                       | 240/<br>33,016       | 273/<br>39,597        | 1.06 (0.87, 1.29) | 84/<br>22,766        | 76/<br>17,256         | 0.80 (0.58, 1.12) | 324/<br>55,782       | 349/<br>56,853        | 0.98 (0.83, 1.17) |
| Sertraline discontinuer ref                    | 240/<br>32,988       | 54/<br>7,755          | 1.14 (0.81, 1.59) | 84/<br>22,734        | 12/<br>3,774          | 1.00 (0.52, 1.92) | 324/<br>55,722       | 66/<br>11,529         | 1.11 (0.82, 1.49) |
| <b>ADHD</b>                                    |                      |                       |                   |                      |                       |                   |                      |                       |                   |
| Crude                                          | 1,389/<br>33,567     | 47,996/<br>1,833,927  | 1.92 (1.82, 2.03) | 223/<br>22,787       | 6,964/<br>1,198,818   | 1.72 (1.50, 1.97) | 1,612/<br>56,354     | 54,960/<br>3,032,745  | 1.89 (1.80, 1.99) |
| Adjusted                                       | 1,323/<br>33,012     | 45,428/<br>1,797,902  | 1.15 (1.08, 1.22) | 223/<br>22,776       | 6,952/<br>1,198,393   | 1.24 (1.06, 1.44) | 1,546/<br>55,788     | 52,380/<br>2,996,295  | 1.16 (1.10, 1.23) |
| AD discontinuer referent                       | 1,323/<br>33,016     | 1,570/<br>39,597      | 1.05 (0.96, 1.14) | 222/<br>22,766       | 195/<br>17,256        | 0.88 (0.71, 1.08) | 1,545/<br>55,782     | 1,765/<br>56,853      | 1.02 (0.95, 1.11) |
| Sertraline discontinuer ref                    | 1,323/<br>32,988     | 299/<br>7,755         | 1.01 (0.86, 1.18) | 221/<br>22,734       | 24/<br>3,774          | 1.36 (0.85, 2.17) | 1,544/<br>55,722     | 323/<br>11,529        | 1.04 (0.90, 1.21) |
| <b>Specific learning disorders</b>             |                      |                       |                   |                      |                       |                   |                      |                       |                   |
| Crude                                          | 103/<br>33,567       | 4,932/<br>1,833,927   | 1.33 (1.10, 1.62) | 15/<br>22,787        | 823/<br>1,198,818     | 0.97 (0.58, 1.61) | 118/<br>56,354       | 5,755/<br>3,032,745   | 1.28 (1.07, 1.54) |
| Adjusted                                       | 101/<br>33,012       | 4,793/<br>1,797,902   | 1.00 (0.80, 1.24) | 15/<br>22,776        | 822/<br>1,198,393     | 0.74 (0.43, 1.28) | 116/<br>55,788       | 5,615/<br>2,996,295   | 0.96 (0.78, 1.17) |
| AD discontinuer referent                       | 101/<br>33,016       | 147/<br>39,597        | 0.78 (0.59, 1.03) | 15/<br>22,766        | 15/<br>17,256         | 0.75 (0.35, 1.61) | 116/<br>55,782       | 162/<br>56,853        | 0.77 (0.59, 1.01) |
| Sertraline discontinuer ref                    | 101/<br>32,988       | 31/<br>7,755          | 0.76 (0.47, 1.23) | 15/<br>22,734        | 2/<br>3,774           | 1.17 (0.26, 5.22) | 116/<br>55,722       | 33/<br>11,529         | 0.79 (0.50, 1.25) |
| <b>Developmental speech/language disorders</b> |                      |                       |                   |                      |                       |                   |                      |                       |                   |
| Crude                                          | 1,374/<br>33,567     | 49,765/<br>1,833,927  | 1.61 (1.53, 1.70) | 533/<br>22,787       | 18,101/<br>1,198,818  | 1.54 (1.41, 1.68) | 1,907/<br>56,354     | 67,866/<br>3,032,745  | 1.59 (1.52, 1.67) |
| Adjusted                                       | 1,338/<br>33,012     | 48,614/<br>1,797,902  | 1.07 (1.01, 1.14) | 533/<br>22,776       | 18,090/<br>1,198,393  | 1.22 (1.11, 1.35) | 1,871/<br>55,788     | 66,704/<br>2,996,295  | 1.12 (1.06, 1.18) |
| AD discontinuer referent                       | 1,339/<br>33,016     | 1,378/<br>39,597      | 1.07 (0.98, 1.17) | 532/<br>22,766       | 307/<br>17,256        | 1.27 (1.08, 1.49) | 1,871/<br>55,782     | 1,685/<br>56,853      | 1.11 (1.03, 1.20) |
| Sertraline discontinuer ref                    | 1,337/<br>32,988     | 242/<br>7,755         | 1.16 (0.96, 1.42) | 532/<br>22,734       | 63/<br>3,774          | 1.14 (0.80, 1.61) | 1,869/<br>55,722     | 305/<br>11,529        | 1.16 (0.98, 1.37) |
| <b>Developmental coordination disorders</b>    |                      |                       |                   |                      |                       |                   |                      |                       |                   |

|                                |                  |                       |                   |                |                      |                   |                  |                       |                                |
|--------------------------------|------------------|-----------------------|-------------------|----------------|----------------------|-------------------|------------------|-----------------------|--------------------------------|
| Crude                          | 158/<br>33,567   | 7,396/<br>1,833,927   | 1.21 (1.03, 1.41) | 93/<br>22,787  | 3,169/<br>1,198,818  | 1.53 (1.24, 1.88) | 251/<br>56,354   | 10,565/<br>3,032,745  | 1.32 (1.16, 1.49)              |
| Adjusted                       | 152/<br>33,012   | 7,302/<br>1,797,902   | 0.89 (0.75, 1.06) | 93/<br>22,776  | 3,164/<br>1,198,393  | 1.13 (0.89, 1.44) | 245/<br>55,788   | 10,466/<br>2,996,295  | 0.97 (0.84, 1.11)              |
| AD discontinuer referent       | 152/<br>33,016   | 163/<br>39,597        | 0.87 (0.66, 1.13) | 93/<br>22,766  | 53/<br>17,256        | 1.48 (1.03, 2.11) | 245/<br>55,782   | 216/<br>56,853        | 1.05 (0.85, 1.29)              |
| Sertraline discontinuer ref    | 152/<br>32,988   | 24/<br>7,755          | 1.03 (0.61, 1.75) | 93/<br>22,734  | 13/<br>3,774         | 1.23 (0.66, 2.32) | 245/<br>55,722   | 37/<br>11,529         | 1.11 (0.74, 1.67)              |
| <b>Intellectual disability</b> |                  |                       |                   |                |                      |                   |                  |                       |                                |
| Crude                          | 63/<br>33,567    | 2,930/<br>1,833,927   | 1.31 (1.02, 1.69) | 0/<br>22,787   | 81/<br>1,198,818     | -                 | 63/<br>33,567    | 2,930/<br>1,833,927   | 1.31 (1.02, 1.69) <sup>1</sup> |
| Adjusted                       | 63/<br>33,012    | 2,842/<br>1,797,902   | 0.94 (0.71, 1.26) | 0/<br>22,776   | 81/<br>1,198,393     | -                 | 63/<br>33,012    | 2,842/<br>1,797,902   | 0.94 (0.71, 1.26) <sup>1</sup> |
| AD discontinuer referent       | 63/<br>33,016    | 90/<br>39,597         | 0.95 (0.66, 1.38) | 0/<br>22,766   | 3/<br>17,256         | -                 | 63/<br>33,016    | 90/<br>39,597         | 0.95 (0.66, 1.38) <sup>1</sup> |
| Sertraline discontinuer ref    | 63/<br>32,988    | 13/<br>7,755          | 1.35 (0.70, 2.57) | 0/<br>22,734   | 1/<br>3,774          | -                 | 63/<br>32,988    | 13/<br>7,755          | 1.35 (0.70, 2.57) <sup>1</sup> |
| <b>Behavioral disorder</b>     |                  |                       |                   |                |                      |                   |                  |                       |                                |
| Crude                          | 942/<br>33,567   | 33,022/<br>1,833,927  | 1.80 (1.68, 1.92) | 91/<br>22,787  | 2,500/<br>1,198,818  | 1.88 (1.52, 2.33) | 1,033/<br>56,354 | 35,522/<br>3,032,745  | 1.80 (1.69, 1.92)              |
| Adjusted                       | 911/<br>33,012   | 31,662/<br>1,797,902  | 1.07 (0.99, 1.16) | 91/<br>22,776  | 2,498/<br>1,198,393  | 1.16 (0.90, 1.48) | 1,002/<br>55,788 | 34,160/<br>2,996,295  | 1.08 (1.00, 1.16)              |
| AD discontinuer referent       | 911/<br>33,016   | 1,093/<br>39,597      | 1.01 (0.91, 1.12) | 90/<br>22,766  | 55/<br>17,256        | 1.17 (0.81, 1.70) | 1,001/<br>55,782 | 1,148/<br>56,853      | 1.02 (0.92, 1.12)              |
| Sertraline discontinuer ref    | 911/<br>32,988   | 201/<br>7,755         | 1.03 (0.83, 1.27) | 89/<br>22,734  | 7/<br>3,774          | 1.90 (0.74, 4.88) | 1,000/<br>55,722 | 208/<br>11,529        | 1.06 (0.86, 1.30)              |
| <b>Any NDD</b>                 |                  |                       |                   |                |                      |                   |                  |                       |                                |
| Crude                          | 2,970/<br>33,567 | 110,036/<br>1,833,927 | 1.71 (1.65, 1.77) | 847/<br>22,787 | 28,668/<br>1,198,818 | 1.57 (1.46, 1.68) | 3,817/<br>56,354 | 138,704/<br>3,032,745 | 1.68 (1.62, 1.73)              |
| Adjusted                       | 2,864/<br>33,012 | 106,079/<br>1,797,902 | 1.09 (1.05, 1.14) | 847/<br>22,776 | 28,641/<br>1,198,393 | 1.21 (1.12, 1.31) | 3,711/<br>55,788 | 134,720/<br>2,996,295 | 1.12 (1.08, 1.16)              |
| AD discontinuer referent       | 2,865/<br>33,016 | 3,212/<br>39,597      | 1.05 (0.99, 1.11) | 845/<br>22,766 | 552/<br>17,256       | 1.15 (1.02, 1.30) | 3,710/<br>55,782 | 3,764/<br>56,853      | 1.07 (1.01, 1.13)              |
| Sertraline discontinuer ref    | 2,863/<br>32,988 | 582/<br>7,755         | 1.08 (0.95, 1.22) | 844/<br>22,734 | 101/<br>3,774        | 1.19 (0.91, 1.55) | 3,707/<br>55,722 | 683/<br>11,529        | 1.10 (0.98, 1.23)              |

<sup>1</sup>Results include data from MAX only due to 0 exposed cases in MarketScan

eTable 9. Hazard ratios and 95% confidence intervals for fluoxetine use in late pregnancy and neurodevelopmental disorders, by data source

| Analysis                                       | MAX                  |                       |                   | MarketScan           |                       |                   | Pooled               |                       |                   |
|------------------------------------------------|----------------------|-----------------------|-------------------|----------------------|-----------------------|-------------------|----------------------|-----------------------|-------------------|
|                                                | Events/<br>N exposed | Events/<br>N referent | HR (95% CI)       | Events/<br>N exposed | Events/<br>N referent | HR (95% CI)       | Events/<br>N exposed | Events/<br>N referent | HR (95% CI)       |
| <b>ASD</b>                                     |                      |                       |                   |                      |                       |                   |                      |                       |                   |
| Crude                                          | 166/<br>18,676       | 8,293/<br>1,833,927   | 1.89 (1.62, 2.20) | 49/<br>8,287         | 3,349/<br>1,198,818   | 1.90 (1.44, 2.52) | 215/<br>26,963       | 11,642/<br>3,032,745  | 1.89 (1.65, 2.17) |
| Adjusted                                       | 162/<br>18,385       | 8,080/<br>1,790,067   | 1.09 (0.91, 1.30) | 49/<br>8,274         | 3,345/<br>1,193,947   | 1.25 (0.91, 1.72) | 211/<br>26,659       | 11,425/<br>2,984,014  | 1.12 (0.96, 1.31) |
| AD discontinuer referent                       | 162/<br>18,384       | 273/<br>39,610        | 1.19 (0.95, 1.47) | 49/<br>8,277         | 76/<br>17,254         | 1.09 (0.74, 1.60) | 211/<br>26,661       | 349/<br>56,864        | 1.16 (0.96, 1.40) |
| Fluoxetine discontinuer ref                    | 160/<br>18,357       | 26/<br>5,638          | 1.60 (0.97, 2.63) | 49/<br>8,238         | 12/<br>2,135          | 0.91 (0.44, 1.87) | 209/<br>26,595       | 38/<br>7,773          | 1.33 (0.88, 2.01) |
| <b>ADHD</b>                                    |                      |                       |                   |                      |                       |                   |                      |                       |                   |
| Crude                                          | 971/<br>18,676       | 47,996/<br>1,833,927  | 2.05 (1.92, 2.19) | 138/<br>8,287        | 6,964/<br>1,198,818   | 2.35 (1.98, 2.80) | 1,109/<br>26,963     | 54,960/<br>3,032,745  | 2.08 (1.96, 2.21) |
| Adjusted                                       | 922/<br>18,385       | 45,418/<br>1,790,067  | 1.15 (1.07, 1.24) | 137/<br>8,274        | 6,948/<br>1,193,947   | 1.67 (1.39, 2.01) | 1,059/<br>26,659     | 52,366/<br>2,984,014  | 1.21 (1.13, 1.30) |
| AD discontinuer referent                       | 922/<br>18,384       | 1,571/<br>39,610      | 1.05 (0.96, 1.15) | 138/<br>8,277        | 195/<br>17,254        | 1.13 (0.89, 1.43) | 1,060/<br>26,661     | 1,766/<br>56,864      | 1.06 (0.97, 1.16) |
| Fluoxetine discontinuer ref                    | 922/<br>18,357       | 195/<br>5,638         | 1.11 (0.91, 1.34) | 137/<br>8,238        | 30/<br>2,135          | 1.07 (0.68, 1.68) | 1,059/<br>26,595     | 225/<br>7,773         | 1.10 (0.92, 1.32) |
| <b>Specific learning disorders</b>             |                      |                       |                   |                      |                       |                   |                      |                       |                   |
| Crude                                          | 70/<br>18,676        | 4,932/<br>1,833,927   | 1.31 (1.03, 1.67) | 8/<br>8,287          | 823/<br>1,198,818     | 1.10 (0.55, 2.20) | 78/<br>26,963        | 5,755/<br>3,032,745   | 1.29 (1.03, 1.62) |
| Adjusted                                       | 67/<br>18,385        | 4,797/<br>1,790,067   | 0.96 (0.73, 1.27) | 8/<br>8,274          | 821/<br>1,193,947     | 0.75 (0.36, 1.56) | 75/<br>26,659        | 5,618/<br>2,984,014   | 0.93 (0.72, 1.21) |
| AD discontinuer referent                       | 67/<br>18,384        | 147/<br>39,610        | 0.79 (0.57, 1.09) | 8/<br>8,277          | 15/<br>17,254         | 0.74 (0.30, 1.80) | 75/<br>26,661        | 162/<br>56,864        | 0.78 (0.58, 1.06) |
| Fluoxetine discontinuer ref                    | 67/<br>18,357        | 23/<br>5,638          | 0.76 (0.43, 1.33) | 8/<br>8,238          | 2/<br>2,135           | 0.61 (0.11, 3.36) | 75/<br>26,595        | 25/<br>7,773          | 0.74 (0.43, 1.26) |
| <b>Developmental speech/language disorders</b> |                      |                       |                   |                      |                       |                   |                      |                       |                   |
| Crude                                          | 875/<br>18,676       | 49,765/<br>1,833,927  | 1.70 (1.59, 1.82) | 196/<br>8,287        | 18,101/<br>1,198,818  | 1.48 (1.28, 1.70) | 1,071/<br>26,963     | 67,866/<br>3,032,745  | 1.65 (1.56, 1.76) |
| Adjusted                                       | 852/<br>18,385       | 48,539/<br>1,790,067  | 1.15 (1.06, 1.24) | 195/<br>8,274        | 18,059/<br>1,193,947  | 1.15 (0.98, 1.34) | 1,047/<br>26,659     | 66,598/<br>2,984,014  | 1.15 (1.07, 1.23) |
| AD discontinuer referent                       | 853/<br>18,384       | 1,378/<br>39,610      | 1.18 (1.07, 1.30) | 196/<br>8,277        | 306/<br>17,254        | 1.27 (1.04, 1.54) | 1,049/<br>26,661     | 1,684/<br>56,864      | 1.20 (1.10, 1.31) |
| Fluoxetine discontinuer ref                    | 850/<br>18,357       | 170/<br>5,638         | 1.24 (1.00, 1.53) | 195/<br>8,238        | 42/<br>2,135          | 1.06 (0.71, 1.59) | 1,045/<br>26,595     | 212/<br>7,773         | 1.20 (0.99, 1.44) |
| <b>Developmental coordination disorders</b>    |                      |                       |                   |                      |                       |                   |                      |                       |                   |

|                                |                  |                       |                   |               |                      |                    |                  |                       |                                |
|--------------------------------|------------------|-----------------------|-------------------|---------------|----------------------|--------------------|------------------|-----------------------|--------------------------------|
| Crude                          | 116/<br>18,676   | 7,396/<br>1,833,927   | 1.51 (1.25, 1.82) | 60/<br>8,287  | 3,169/<br>1,198,818  | 2.60 (2.01, 3.37)  | 176/<br>26,963   | 10,565/<br>3,032,745  | 1.82 (1.56, 2.12)              |
| Adjusted                       | 111/<br>18,385   | 7,276/<br>1,790,067   | 1.25 (1.01, 1.54) | 60/<br>8,274  | 3,157/<br>1,193,947  | 1.90 (1.43, 2.54)  | 171/<br>26,659   | 10,433/<br>2,984,014  | 1.44 (1.22, 1.71)              |
| AD discontinuer referent       | 112/<br>18,384   | 163/<br>39,610        | 1.21 (0.90, 1.62) | 60/<br>8,277  | 53/<br>17,254        | 2.61 (1.72, 3.95)  | 172/<br>26,661   | 216/<br>56,864        | 1.56 (1.23, 1.98)              |
| Fluoxetine discontinuer ref    | 111/<br>18,357   | 25/<br>5,638          | 0.91 (0.45, 1.83) | 60/<br>8,238  | 5/<br>2,135          | 3.59 (1.18, 10.96) | 171/<br>26,595   | 30/<br>7,773          | 1.34 (0.74, 2.43)              |
| <b>Intellectual disability</b> |                  |                       |                   |               |                      |                    |                  |                       |                                |
| Crude                          | 47/<br>18,676    | 2,930/<br>1,833,927   | 1.50 (1.11, 2.02) | 0/<br>8,287   | 81/<br>1,198,818     | -                  | 47/<br>18,676    | 2,930/<br>1,833,927   | 1.50 (1.11, 2.02) <sup>1</sup> |
| Adjusted                       | 47/<br>18,385    | 2,800/<br>1,790,067   | 0.96 (0.68, 1.36) | 0/<br>8,274   | 81/<br>1,193,947     | -                  | 47/<br>18,385    | 2,800/<br>1,790,067   | 0.96 (0.68, 1.36) <sup>1</sup> |
| AD discontinuer referent       | 47/<br>18,384    | 90/<br>39,610         | 1.04 (0.70, 1.56) | 0/<br>8,277   | 3/<br>17,254         | -                  | 47/<br>18,384    | 90/<br>39,610         | 1.04 (0.70, 1.56) <sup>1</sup> |
| Fluoxetine discontinuer ref    | 47/<br>18,357    | 13/<br>5,638          | 0.73 (0.30, 1.76) | 0/<br>8,238   | 0/<br>2,135          | -                  | 47/<br>18,357    | 13/<br>5,638          | 0.73 (0.30, 1.76) <sup>1</sup> |
| <b>Behavioral disorder</b>     |                  |                       |                   |               |                      |                    |                  |                       |                                |
| Crude                          | 726/<br>18,676   | 33,022/<br>1,833,927  | 2.16 (2.01, 2.33) | 41/<br>8,287  | 2,500/<br>1,198,818  | 2.01 (1.46, 2.75)  | 767/<br>26,963   | 35,522/<br>3,032,745  | 2.16 (2.00, 2.32)              |
| Adjusted                       | 702/<br>18,385   | 31,655/<br>1,790,067  | 1.21 (1.11, 1.32) | 41/<br>8,274  | 2,496/<br>1,193,947  | 1.20 (0.85, 1.70)  | 743/<br>26,659   | 34,151/<br>2,984,014  | 1.21 (1.11, 1.32)              |
| AD discontinuer referent       | 703/<br>18,384   | 1,094/<br>39,610      | 1.16 (1.03, 1.29) | 41/<br>8,277  | 55/<br>17,254        | 1.33 (0.85, 2.09)  | 744/<br>26,661   | 1,149/<br>56,864      | 1.17 (1.05, 1.30)              |
| Fluoxetine discontinuer ref    | 700/<br>18,357   | 162/<br>5,638         | 1.16 (0.90, 1.49) | 41/<br>8,238  | 5/<br>2,135          | 2.67 (0.98, 7.25)  | 741/<br>26,595   | 167/<br>7,773         | 1.22 (0.96, 1.55)              |
| <b>Any NDD</b>                 |                  |                       |                   |               |                      |                    |                  |                       |                                |
| Crude                          | 2,005/<br>18,676 | 110,036/<br>1,833,927 | 1.88 (1.80, 1.97) | 395/<br>8,287 | 28,668/<br>1,198,818 | 1.83 (1.66, 2.02)  | 2,400/<br>26,963 | 138,704/<br>3,032,745 | 1.87 (1.80, 1.95)              |
| Adjusted                       | 1,935/<br>18,385 | 105,939/<br>1,790,067 | 1.17 (1.11, 1.23) | 393/<br>8,274 | 28,597/<br>1,193,947 | 1.36 (1.22, 1.52)  | 2,328/<br>26,659 | 134,536/<br>2,984,014 | 1.20 (1.15, 1.26)              |
| AD discontinuer referent       | 1,936/<br>18,384 | 3,214/<br>39,610      | 1.14 (1.07, 1.22) | 395/<br>8,277 | 551/<br>17,254       | 1.33 (1.15, 1.54)  | 2,331/<br>26,661 | 3,765/<br>56,864      | 1.17 (1.10, 1.24)              |
| Fluoxetine discontinuer ref    | 1,930/<br>18,357 | 415/<br>5,638         | 1.13 (0.98, 1.30) | 393/<br>8,238 | 78/<br>2,135         | 1.18 (0.89, 1.57)  | 2,323/<br>26,595 | 493/<br>7,773         | 1.14 (1.00, 1.29)              |

<sup>1</sup>Results include data from MAX only due to 0 exposed cases in MarketScan

eTable 10. Hazard ratios and 95% confidence intervals for bupropion use in late pregnancy and neurodevelopmental disorders, by data source

| Analysis                                       | MAX                  |                       |                   | MarketScan           |                       |                   | Pooled               |                       |                   |
|------------------------------------------------|----------------------|-----------------------|-------------------|----------------------|-----------------------|-------------------|----------------------|-----------------------|-------------------|
|                                                | Events/<br>N exposed | Events/<br>N referent | HR (95% CI)       | Events/<br>N exposed | Events/<br>N referent | HR (95% CI)       | Events/<br>N exposed | Events/<br>N referent | HR (95% CI)       |
| <b>ASD</b>                                     |                      |                       |                   |                      |                       |                   |                      |                       |                   |
| Crude                                          | 112/<br>13,090       | 8,293/<br>1,833,927   | 1.84 (1.53, 2.22) | 30/<br>6,638         | 3,349/<br>1,198,818   | 1.45 (1.01, 2.08) | 142/<br>19,728       | 11,642/<br>3,032,745  | 1.75 (1.48, 2.06) |
| Adjusted                                       | 107/<br>12,794       | 8,066/<br>1,785,311   | 1.07 (0.87, 1.32) | 30/<br>6,632         | 3,344/<br>1,196,381   | 0.97 (0.65, 1.43) | 137/<br>19,426       | 11,410/<br>2,981,692  | 1.05 (0.87, 1.26) |
| AD discontinuer referent                       | 108/<br>12,793       | 273/<br>39,495        | 1.17 (0.92, 1.50) | 30/<br>6,632         | 76/<br>17,247         | 0.89 (0.56, 1.41) | 138/<br>19,425       | 349/<br>56,742        | 1.11 (0.89, 1.37) |
| Bupropion discontinuer ref                     | 108/<br>12,756       | 39/<br>4,360          | 0.94 (0.59, 1.51) | 29/<br>6,585         | 10/<br>2,536          | 1.02 (0.46, 2.30) | 137/<br>19,341       | 49/<br>6,896          | 0.96 (0.64, 1.45) |
| <b>ADHD</b>                                    |                      |                       |                   |                      |                       |                   |                      |                       |                   |
| Crude                                          | 692/<br>13,090       | 47,996/<br>1,833,927  | 2.19 (2.03, 2.36) | 122/<br>6,638        | 6,964/<br>1,198,818   | 2.70 (2.25, 3.25) | 814/<br>19,728       | 54,960/<br>3,032,745  | 2.26 (2.10, 2.42) |
| Adjusted                                       | 647/<br>12,794       | 45,392/<br>1,785,311  | 1.26 (1.16, 1.37) | 121/<br>6,632        | 6,949/<br>1,196,381   | 1.83 (1.50, 2.23) | 768/<br>19,426       | 52,341/<br>2,981,692  | 1.34 (1.24, 1.44) |
| AD discontinuer referent                       | 647/<br>12,793       | 1,571/<br>39,495      | 1.15 (1.04, 1.28) | 121/<br>6,632        | 195/<br>17,247        | 1.28 (0.99, 1.66) | 768/<br>19,425       | 1,766/<br>56,742      | 1.17 (1.06, 1.28) |
| Bupropion discontinuer ref                     | 645/<br>12,756       | 188/<br>4,360         | 1.00 (0.82, 1.23) | 120/<br>6,585        | 35/<br>2,536          | 1.19 (0.78, 1.81) | 765/<br>19,341       | 223/<br>6,896         | 1.04 (0.86, 1.24) |
| <b>Specific learning disorders</b>             |                      |                       |                   |                      |                       |                   |                      |                       |                   |
| Crude                                          | 48/<br>13,090        | 4,932/<br>1,833,927   | 1.42 (1.07, 1.88) | 11/<br>6,638         | 823/<br>1,198,818     | 1.99 (1.10, 3.62) | 59/<br>19,728        | 5,755/<br>3,032,745   | 1.51 (1.17, 1.95) |
| Adjusted                                       | 48/<br>12,794        | 4,782/<br>1,785,311   | 1.18 (0.87, 1.60) | 11/<br>6,632         | 822/<br>1,196,381     | 1.46 (0.76, 2.80) | 59/<br>19,426        | 5,604/<br>2,981,692   | 1.23 (0.93, 1.62) |
| AD discontinuer referent                       | 48/<br>12,793        | 146/<br>39,495        | 0.87 (0.61, 1.24) | 11/<br>6,632         | 15/<br>17,247         | 1.30 (0.52, 3.22) | 59/<br>19,425        | 161/<br>56,742        | 0.92 (0.66, 1.28) |
| Bupropion discontinuer ref                     | 48/<br>12,756        | 21/<br>4,360          | 0.86 (0.47, 1.57) | 11/<br>6,585         | 2/<br>2,536           | 1.54 (0.33, 7.23) | 59/<br>19,341        | 23/<br>6,896          | 0.93 (0.53, 1.63) |
| <b>Developmental speech/language disorders</b> |                      |                       |                   |                      |                       |                   |                      |                       |                   |
| Crude                                          | 587/<br>13,090       | 49,765/<br>1,833,927  | 1.62 (1.50, 1.76) | 137/<br>6,638        | 18,101/<br>1,198,818  | 1.27 (1.08, 1.51) | 724/<br>19,728       | 67,866/<br>3,032,745  | 1.55 (1.44, 1.67) |
| Adjusted                                       | 572/<br>12,794       | 48,542/<br>1,785,311  | 1.13 (1.04, 1.24) | 137/<br>6,632        | 18,073/<br>1,196,381  | 1.01 (0.84, 1.21) | 709/<br>19,426       | 66,615/<br>2,981,692  | 1.11 (1.02, 1.20) |
| AD discontinuer referent                       | 575/<br>12,793       | 1,377/<br>39,495      | 1.14 (1.02, 1.27) | 137/<br>6,632        | 306/<br>17,247        | 1.09 (0.86, 1.37) | 712/<br>19,425       | 1,683/<br>56,742      | 1.13 (1.02, 1.25) |
| Bupropion discontinuer ref                     | 572/<br>12,756       | 143/<br>4,360         | 1.16 (0.92, 1.46) | 136/<br>6,585        | 52/<br>2,536          | 0.97 (0.67, 1.40) | 708/<br>19,341       | 195/<br>6,896         | 1.10 (0.91, 1.34) |
| <b>Developmental coordination disorders</b>    |                      |                       |                   |                      |                       |                   |                      |                       |                   |

|                                |                  |                       |                   |               |                      |                   |                  |                       |                                |
|--------------------------------|------------------|-----------------------|-------------------|---------------|----------------------|-------------------|------------------|-----------------------|--------------------------------|
| Crude                          | 82/<br>13,090    | 7,396/<br>1,833,927   | 1.52 (1.23, 1.90) | 27/<br>6,638  | 3,169/<br>1,198,818  | 1.45 (1.00, 2.12) | 109/<br>19,728   | 10,565/<br>3,032,745  | 1.51 (1.25, 1.82)              |
| Adjusted                       | 82/<br>12,794    | 7,241/<br>1,785,311   | 1.38 (1.09, 1.73) | 27/<br>6,632  | 3,156/<br>1,196,381  | 1.07 (0.72, 1.61) | 109/<br>19,426   | 10,397/<br>2,981,692  | 1.30 (1.06, 1.58)              |
| AD discontinuer referent       | 82/<br>12,793    | 163/<br>39,495        | 1.38 (1.02, 1.86) | 27/<br>6,632  | 53/<br>17,247        | 1.72 (1.06, 2.79) | 109/<br>19,425   | 216/<br>56,742        | 1.46 (1.13, 1.89)              |
| Bupropion discontinuer ref     | 82/<br>12,756    | 13/<br>4,360          | 2.30 (1.20, 4.40) | 27/<br>6,585  | 9/<br>2,536          | 1.47 (0.68, 3.17) | 109/<br>19,341   | 22/<br>6,896          | 1.91 (1.16, 3.14)              |
| <b>Intellectual disability</b> |                  |                       |                   |               |                      |                   |                  |                       |                                |
| Crude                          | 30/<br>13,090    | 2,930/<br>1,833,927   | 1.43 (1.00, 2.04) | 0/<br>6,638   | 81/<br>1,198,818     | -                 | 30/<br>13,090    | 2,930/<br>1,833,927   | 1.43 (1.00, 2.04) <sup>1</sup> |
| Adjusted                       | 30/<br>12,794    | 2,875/<br>1,785,311   | 1.06 (0.71, 1.56) | 0/<br>6,632   | 81/<br>1,196,381     | -                 | 30/<br>12,794    | 2,875/<br>1,785,311   | 1.06 (0.71, 1.56) <sup>1</sup> |
| AD discontinuer referent       | 30/<br>12,793    | 90/<br>39,495         | 1.04 (0.65, 1.67) | 0/<br>6,632   | 3/<br>17,247         | -                 | 30/<br>12,793    | 90/<br>39,495         | 1.04 (0.65, 1.67) <sup>1</sup> |
| Bupropion discontinuer ref     | 30/<br>12,756    | <11/<br>4,360         | 1.99 (0.90, 4.37) | 0/<br>6,585   | 0/<br>2,536          | -                 | 30/<br>12,756    | <11/<br>4,360         | 1.99 (0.90, 4.37) <sup>1</sup> |
| <b>Behavioral disorder</b>     |                  |                       |                   |               |                      |                   |                  |                       |                                |
| Crude                          | 430/<br>13,090   | 33,022/<br>1,833,927  | 1.87 (1.70, 2.05) | 46/<br>6,638  | 2,500/<br>1,198,818  | 2.85 (2.13, 3.82) | 476/<br>19,728   | 35,522/<br>3,032,745  | 1.94 (1.78, 2.13)              |
| Adjusted                       | 407/<br>12,794   | 31,620/<br>1,785,311  | 1.09 (0.98, 1.22) | 46/<br>6,632  | 2,497/<br>1,196,381  | 1.72 (1.21, 2.43) | 453/<br>19,426   | 34,117/<br>2,981,692  | 1.14 (1.03, 1.26)              |
| AD discontinuer referent       | 408/<br>12,793   | 1,091/<br>39,495      | 1.05 (0.92, 1.19) | 46/<br>6,632  | 55/<br>17,247        | 1.80 (1.15, 2.83) | 454/<br>19,425   | 1,146/<br>56,742      | 1.09 (0.96, 1.23)              |
| Bupropion discontinuer ref     | 405/<br>12,756   | 120/<br>4,360         | 1.01 (0.79, 1.31) | 45/<br>6,585  | 10/<br>2,536         | 1.41 (0.67, 2.96) | 450/<br>19,341   | 130/<br>6,896         | 1.05 (0.82, 1.34)              |
| <b>Any NDD</b>                 |                  |                       |                   |               |                      |                   |                  |                       |                                |
| Crude                          | 1,337/<br>13,090 | 110,036/<br>1,833,927 | 1.79 (1.70, 1.89) | 285/<br>6,638 | 28,668/<br>1,198,818 | 1.65 (1.47, 1.85) | 1,622/<br>19,728 | 138,704/<br>3,032,745 | 1.77 (1.68, 1.86)              |
| Adjusted                       | 1,278/<br>12,794 | 105,925/<br>1,785,311 | 1.16 (1.09, 1.23) | 284/<br>6,632 | 28,612/<br>1,196,381 | 1.24 (1.09, 1.41) | 1,562/<br>19,426 | 134,537/<br>2,981,692 | 1.17 (1.11, 1.24)              |
| AD discontinuer referent       | 1,280/<br>12,793 | 3,210/<br>39,495      | 1.12 (1.04, 1.20) | 284/<br>6,632 | 551/<br>17,247       | 1.19 (1.01, 1.41) | 1,564/<br>19,425 | 3,761/<br>56,742      | 1.13 (1.06, 1.20)              |
| Bupropion discontinuer ref     | 1,274/<br>12,756 | 354/<br>4,360         | 1.07 (0.93, 1.24) | 281/<br>6,585 | 94/<br>2,536         | 1.06 (0.81, 1.38) | 1,555/<br>19,341 | 448/<br>6,896         | 1.07 (0.94, 1.21)              |

<sup>1</sup>Results include data from MAX only due to 0 exposed cases in MarketScan  
Event counts are obscured when <11 in MAX due to the CMS cell size suppression policy.

eTable 11. Hazard ratios and 95% confidence intervals for citalopram use in late pregnancy and neurodevelopmental disorders, by data source

| Analysis                                       | MAX                  |                       |                   | MarketScan           |                       |                   | Pooled               |                       |                   |
|------------------------------------------------|----------------------|-----------------------|-------------------|----------------------|-----------------------|-------------------|----------------------|-----------------------|-------------------|
|                                                | Events/<br>N exposed | Events/<br>N referent | HR (95% CI)       | Events/<br>N exposed | Events/<br>N referent | HR (95% CI)       | Events/<br>N exposed | Events/<br>N referent | HR (95% CI)       |
| <b>ASD</b>                                     |                      |                       |                   |                      |                       |                   |                      |                       |                   |
| Crude                                          | 72/<br>9,204         | 8,293/<br>1,833,927   | 2.10 (1.67, 2.65) | 23/<br>4,771         | 3,349/<br>1,198,818   | 1.83 (1.21, 2.75) | 95/<br>13,975        | 11,642/<br>3,032,745  | 2.03 (1.66, 2.48) |
| Adjusted                                       | 69/<br>9,052         | 7,912/<br>1,742,531   | 1.11 (0.85, 1.44) | 23/<br>4,766         | 3,287/<br>1,178,028   | 1.20 (0.77, 1.86) | 92/<br>13,818        | 11,199/<br>2,920,559  | 1.13 (0.90, 1.41) |
| AD discontinuer referent                       | 69/<br>9,051         | 273/<br>39,567        | 1.27 (0.94, 1.70) | 23/<br>4,758         | 76/<br>17,137         | 1.08 (0.65, 1.79) | 92/<br>13,809        | 349/<br>56,704        | 1.22 (0.94, 1.57) |
| Citalopram discontinuer ref                    | 69/<br>9,050         | 31/<br>5,527          | 1.47 (0.88, 2.45) | 23/<br>4,747         | 11/<br>2,078          | 0.91 (0.41, 2.03) | 92/<br>13,797        | 42/<br>7,605          | 1.28 (0.83, 1.97) |
| <b>ADHD</b>                                    |                      |                       |                   |                      |                       |                   |                      |                       |                   |
| Crude                                          | 350/<br>9,204        | 47,996/<br>1,833,927  | 2.17 (1.95, 2.41) | 39/<br>4,771         | 6,964/<br>1,198,818   | 1.80 (1.31, 2.47) | 389/<br>13,975       | 54,960/<br>3,032,745  | 2.13 (1.92, 2.35) |
| Adjusted                                       | 335/<br>9,052        | 43,926/<br>1,742,531  | 1.22 (1.08, 1.37) | 39/<br>4,766         | 6,821/<br>1,178,028   | 1.30 (0.94, 1.80) | 374/<br>13,818       | 50,747/<br>2,920,559  | 1.23 (1.10, 1.37) |
| AD discontinuer referent                       | 335/<br>9,051        | 1,569/<br>39,567      | 1.17 (1.02, 1.33) | 38/<br>4,758         | 189/<br>17,137        | 0.98 (0.68, 1.41) | 373/<br>13,809       | 1,758/<br>56,704      | 1.14 (1.01, 1.30) |
| Citalopram discontinuer ref                    | 335/<br>9,050        | 164/<br>5,527         | 1.04 (0.81, 1.34) | 38/<br>4,747         | 19/<br>2,078          | 0.91 (0.48, 1.71) | 373/<br>13,797       | 183/<br>7,605         | 1.03 (0.81, 1.29) |
| <b>Specific learning disorders</b>             |                      |                       |                   |                      |                       |                   |                      |                       |                   |
| Crude                                          | 21/<br>9,204         | 4,932/<br>1,833,927   | 1.17 (0.76, 1.80) | 6/<br>4,771          | 823/<br>1,198,818     | 2.29 (1.02, 5.11) | 27/<br>13,975        | 5,755/<br>3,032,745   | 1.36 (0.93, 1.99) |
| Adjusted                                       | 21/<br>9,052         | 4,565/<br>1,742,531   | 0.95 (0.60, 1.49) | 6/<br>4,766          | 789/<br>1,178,028     | 1.48 (0.63, 3.44) | 27/<br>13,818        | 5,354/<br>2,920,559   | 1.04 (0.70, 1.55) |
| AD discontinuer referent                       | 21/<br>9,051         | 146/<br>39,567        | 0.77 (0.47, 1.26) | 6/<br>4,758          | 14/<br>17,137         | 2.31 (0.83, 6.46) | 27/<br>13,809        | 160/<br>56,704        | 0.94 (0.60, 1.47) |
| Citalopram discontinuer ref                    | 21/<br>9,050         | <11/<br>5,527         | 1.64 (0.65, 4.09) | 6/<br>4,747          | 0/<br>2,078           | -                 | 21/<br>9,050         | <11/<br>5,527         | 1.64 (0.65, 4.09) |
| <b>Developmental speech/language disorders</b> |                      |                       |                   |                      |                       |                   |                      |                       |                   |
| Crude                                          | 342/<br>9,204        | 49,765/<br>1,833,927  | 1.63 (1.47, 1.82) | 121/<br>4,771        | 18,101/<br>1,198,818  | 1.74 (1.45, 2.09) | 463/<br>13,975       | 67,866/<br>3,032,745  | 1.66 (1.51, 1.82) |
| Adjusted                                       | 335/<br>9,052        | 47,783/<br>1,742,531  | 1.10 (0.98, 1.24) | 121/<br>4,766        | 17,838/<br>1,178,028  | 1.28 (1.06, 1.55) | 456/<br>13,818       | 65,621/<br>2,920,559  | 1.15 (1.04, 1.27) |
| AD discontinuer referent                       | 335/<br>9,051        | 1,378/<br>39,567      | 1.12 (0.98, 1.29) | 121/<br>4,758        | 307/<br>17,137        | 1.33 (1.05, 1.68) | 456/<br>13,809       | 1,685/<br>56,704      | 1.17 (1.04, 1.32) |
| Citalopram discontinuer ref                    | 334/<br>9,050        | 172/<br>5,527         | 1.04 (0.83, 1.30) | 120/<br>4,747        | 45/<br>2,078          | 1.32 (0.88, 1.98) | 454/<br>13,797       | 217/<br>7,605         | 1.10 (0.90, 1.33) |
| <b>Developmental coordination disorders</b>    |                      |                       |                   |                      |                       |                   |                      |                       |                   |

|                                |               |                       |                   |               |                      |                   |                |                       |                                |
|--------------------------------|---------------|-----------------------|-------------------|---------------|----------------------|-------------------|----------------|-----------------------|--------------------------------|
| Crude                          | 44/<br>9,204  | 7,396/<br>1,833,927   | 1.31 (0.97, 1.78) | 34/<br>4,771  | 3,169/<br>1,198,818  | 2.76 (1.97, 3.87) | 78/<br>13,975  | 10,565/<br>3,032,745  | 1.83 (1.46, 2.29)              |
| Adjusted                       | 42/<br>9,052  | 7,230/<br>1,742,531   | 1.04 (0.75, 1.45) | 34/<br>4,766  | 3,138/<br>1,178,028  | 1.88 (1.31, 2.70) | 76/<br>13,818  | 10,368/<br>2,920,559  | 1.36 (1.07, 1.73)              |
| AD discontinuer referent       | 42/<br>9,051  | 163/<br>39,567        | 1.09 (0.75, 1.58) | 33/<br>4,758  | 53/<br>17,137        | 2.18 (1.34, 3.54) | 75/<br>13,809  | 216/<br>56,704        | 1.40 (1.04, 1.89)              |
| Citalopram discontinuer ref    | 42/<br>9,050  | 21/<br>5,527          | 1.16 (0.59, 2.27) | 33/<br>4,747  | 8/<br>2,078          | 1.86 (0.79, 4.38) | 75/<br>13,797  | 29/<br>7,605          | 1.39 (0.82, 2.36)              |
| <b>Intellectual disability</b> |               |                       |                   |               |                      |                   |                |                       |                                |
| Crude                          | 12/<br>9,204  | 2,930/<br>1,833,927   | 1.06 (0.60, 1.87) | 0/<br>4,771   | 81/<br>1,198,818     | -                 | 12/<br>9,204   | 2,930/<br>1,833,927   | 1.06 (0.60, 1.87) <sup>1</sup> |
| Adjusted                       | 12/<br>9,052  | 2,750/<br>1,742,531   | 0.68 (0.37, 1.24) | 0/<br>4,766   | 80/<br>1,178,028     | -                 | 12/<br>9,052   | 2,750/<br>1,742,531   | 0.68 (0.37, 1.24) <sup>1</sup> |
| AD discontinuer referent       | 12/<br>9,051  | 90/<br>39,567         | 0.74 (0.39, 1.40) | 0/<br>4,758   | 3/<br>17,137         | -                 | 12/<br>9,051   | 90/<br>39,567         | 0.74 (0.39, 1.40) <sup>1</sup> |
| Citalopram discontinuer ref    | 12/<br>9,050  | <11/<br>5,527         | 1.26 (0.41, 3.82) | 0/<br>4,747   | 0/<br>2,078          | -                 | 12/<br>9,050   | <11/<br>5,527         | 1.26 (0.41, 3.82) <sup>1</sup> |
| <b>Behavioral disorder</b>     |               |                       |                   |               |                      |                   |                |                       |                                |
| Crude                          | 256/<br>9,204 | 33,022/<br>1,833,927  | 2.12 (1.87, 2.40) | 23/<br>4,771  | 2,500/<br>1,198,818  | 2.64 (1.75, 3.99) | 279/<br>13,975 | 35,522/<br>3,032,745  | 2.16 (1.91, 2.43)              |
| Adjusted                       | 247/<br>9,052 | 30,541/<br>1,742,531  | 1.15 (1.00, 1.32) | 23/<br>4,766  | 2,451/<br>1,178,028  | 1.62 (1.05, 2.50) | 270/<br>13,818 | 32,992/<br>2,920,559  | 1.19 (1.04, 1.36)              |
| AD discontinuer referent       | 247/<br>9,051 | 1,091/<br>39,567      | 1.12 (0.96, 1.32) | 23/<br>4,758  | 55/<br>17,137        | 1.51 (0.86, 2.67) | 270/<br>13,809 | 1,146/<br>56,704      | 1.15 (0.98, 1.34)              |
| Citalopram discontinuer ref    | 247/<br>9,050 | 138/<br>5,527         | 0.75 (0.55, 1.02) | 23/<br>4,747  | 7/<br>2,078          | 1.02 (0.39, 2.68) | 270/<br>13,797 | 145/<br>7,605         | 0.77 (0.58, 1.03)              |
| <b>Any NDD</b>                 |               |                       |                   |               |                      |                   |                |                       |                                |
| Crude                          | 765/<br>9,204 | 110,036/<br>1,833,927 | 1.85 (1.72, 1.99) | 195/<br>4,771 | 28,668/<br>1,198,818 | 1.88 (1.63, 2.16) | 960/<br>13,975 | 138,704/<br>3,032,745 | 1.86 (1.74, 1.98)              |
| Adjusted                       | 741/<br>9,052 | 103,131/<br>1,742,531 | 1.15 (1.06, 1.24) | 195/<br>4,766 | 28,192/<br>1,178,028 | 1.36 (1.17, 1.58) | 936/<br>13,818 | 131,323/<br>2,920,559 | 1.19 (1.11, 1.28)              |
| AD discontinuer referent       | 741/<br>9,051 | 3,210/<br>39,567      | 1.16 (1.06, 1.27) | 193/<br>4,758 | 546/<br>17,137       | 1.33 (1.11, 1.60) | 934/<br>13,809 | 3,756/<br>56,704      | 1.19 (1.10, 1.29)              |
| Citalopram discontinuer ref    | 740/<br>9,050 | 372/<br>5,527         | 1.02 (0.86, 1.20) | 192/<br>4,747 | 71/<br>2,078         | 1.23 (0.89, 1.69) | 932/<br>13,797 | 443/<br>7,605         | 1.06 (0.91, 1.23)              |

<sup>1</sup>Results include data from MAX only due to 0 exposed cases in MarketScan  
Event counts are obscured when <11 in MAX due to the CMS cell size suppression policy.



eTable 12. Hazard ratios and 95% confidence intervals for escitalopram use in late pregnancy and neurodevelopmental disorders, by data source

| Analysis                                       | MAX                  |                       |                   | MarketScan           |                       |                    | Pooled               |                       |                   |
|------------------------------------------------|----------------------|-----------------------|-------------------|----------------------|-----------------------|--------------------|----------------------|-----------------------|-------------------|
|                                                | Events/<br>N exposed | Events/<br>N referent | HR (95% CI)       | Events/<br>N exposed | Events/<br>N referent | HR (95% CI)        | Events/<br>N exposed | Events/<br>N referent | HR (95% CI)       |
| <b>ASD</b>                                     |                      |                       |                   |                      |                       |                    |                      |                       |                   |
| Crude                                          | 63/<br>6,865         | 8,293/<br>1,833,927   | 2.00 (1.56, 2.55) | 36/<br>6,668         | 3,349/<br>1,198,818   | 1.92 (1.38, 2.66)  | 99/<br>13,533        | 11,642/<br>3,032,745  | 1.97 (1.61, 2.40) |
| Adjusted                                       | 62/<br>6,740         | 7,287/<br>1,634,187   | 0.95 (0.71, 1.26) | 36/<br>6,658         | 3,343/<br>1,196,322   | 1.34 (0.94, 1.91)  | 98/<br>13,398        | 10,630/<br>2,830,509  | 1.09 (0.87, 1.36) |
| AD discontinuer referent                       | 63/<br>6,745         | 245/<br>37,187        | 1.14 (0.84, 1.55) | 36/<br>6,663         | 76/<br>17,222         | 1.22 (0.80, 1.86)  | 99/<br>13,408        | 321/<br>54,409        | 1.17 (0.91, 1.49) |
| Escitalopram discontinuer ref                  | 63/<br>6,709         | 36/<br>3,736          | 1.20 (0.75, 1.92) | 36/<br>6,655         | 10/<br>2,729          | 1.11 (0.47, 2.58)  | 99/<br>13,364        | 46/<br>6,465          | 1.17 (0.78, 1.77) |
| <b>ADHD</b>                                    |                      |                       |                   |                      |                       |                    |                      |                       |                   |
| Crude                                          | 357/<br>6,865        | 47,996/<br>1,833,927  | 2.22 (2.00, 2.47) | 92/<br>6,668         | 6,964/<br>1,198,818   | 2.38 (1.93, 2.93)  | 449/<br>13,533       | 54,960/<br>3,032,745  | 2.25 (2.05, 2.47) |
| Adjusted                                       | 344/<br>6,740        | 36,507/<br>1,634,187  | 1.21 (1.08, 1.36) | 92/<br>6,658         | 6,946/<br>1,196,322   | 1.66 (1.33, 2.06)  | 436/<br>13,398       | 43,453/<br>2,830,509  | 1.30 (1.17, 1.44) |
| AD discontinuer referent                       | 346/<br>6,745        | 1,370/<br>37,187      | 1.09 (0.95, 1.24) | 92/<br>6,663         | 195/<br>17,222        | 1.25 (0.96, 1.63)  | 438/<br>13,408       | 1,565/<br>54,409      | 1.12 (0.99, 1.26) |
| Escitalopram discontinuer ref                  | 344/<br>6,709        | 150/<br>3,736         | 1.16 (0.85, 1.57) | 92/<br>6,655         | 34/<br>2,729          | 1.39 (0.86, 2.23)  | 436/<br>13,364       | 184/<br>6,465         | 1.22 (0.94, 1.58) |
| <b>Specific learning disorders</b>             |                      |                       |                   |                      |                       |                    |                      |                       |                   |
| Crude                                          | 29/<br>6,865         | 4,932/<br>1,833,927   | 1.75 (1.21, 2.52) | 8/<br>6,668          | 823/<br>1,198,818     | 1.72 (0.86, 3.46)  | 37/<br>13,533        | 5,755/<br>3,032,745   | 1.74 (1.26, 2.41) |
| Adjusted                                       | 29/<br>6,740         | 3,733/<br>1,634,187   | 1.27 (0.83, 1.95) | 8/<br>6,658          | 821/<br>1,196,322     | 1.28 (0.61, 2.67)  | 37/<br>13,398        | 4,554/<br>2,830,509   | 1.27 (0.88, 1.84) |
| AD discontinuer referent                       | 29/<br>6,745         | 133/<br>37,187        | 0.99 (0.64, 1.52) | 8/<br>6,663          | 15/<br>17,222         | 1.47 (0.60, 3.61)  | 37/<br>13,408        | 148/<br>54,409        | 1.06 (0.72, 1.57) |
| Escitalopram discontinuer ref                  | 29/<br>6,709         | 14/<br>3,736          | 0.93 (0.42, 2.08) | 8/<br>6,655          | 2/<br>2,729           | 3.62 (0.77, 16.96) | 37/<br>13,364        | 16/<br>6,465          | 1.24 (0.61, 2.53) |
| <b>Developmental speech/language disorders</b> |                      |                       |                   |                      |                       |                    |                      |                       |                   |
| Crude                                          | 356/<br>6,865        | 49,765/<br>1,833,927  | 1.89 (1.70, 2.10) | 140/<br>6,668        | 18,101/<br>1,198,818  | 1.41 (1.20, 1.67)  | 496/<br>13,533       | 67,866/<br>3,032,745  | 1.74 (1.59, 1.90) |
| Adjusted                                       | 349/<br>6,740        | 42,477/<br>1,634,187  | 1.22 (1.09, 1.37) | 140/<br>6,658        | 18,073/<br>1,196,322  | 1.13 (0.95, 1.34)  | 489/<br>13,398       | 60,550/<br>2,830,509  | 1.19 (1.08, 1.31) |
| AD discontinuer referent                       | 350/<br>6,745        | 1,259/<br>37,187      | 1.21 (1.06, 1.38) | 140/<br>6,663        | 305/<br>17,222        | 1.20 (0.97, 1.48)  | 490/<br>13,408       | 1,564/<br>54,409      | 1.21 (1.08, 1.35) |
| Escitalopram discontinuer ref                  | 348/<br>6,709        | 152/<br>3,736         | 1.35 (1.07, 1.72) | 140/<br>6,655        | 46/<br>2,729          | 1.20 (0.79, 1.80)  | 488/<br>13,364       | 198/<br>6,465         | 1.31 (1.07, 1.61) |
| <b>Developmental coordination disorders</b>    |                      |                       |                   |                      |                       |                    |                      |                       |                   |

|                                |               |                       |                   |               |                      |                   |                  |                       |                                |
|--------------------------------|---------------|-----------------------|-------------------|---------------|----------------------|-------------------|------------------|-----------------------|--------------------------------|
| Crude                          | 45/<br>6,865  | 7,396/<br>1,833,927   | 1.59 (1.19, 2.13) | 42/<br>6,668  | 3,169/<br>1,198,818  | 2.38 (1.76, 3.23) | 87/<br>13,533    | 10,565/<br>3,032,745  | 1.93 (1.56, 2.38)              |
| Adjusted                       | 45/<br>6,740  | 6,775/<br>1,634,187   | 1.33 (0.97, 1.81) | 42/<br>6,658  | 3,161/<br>1,196,322  | 1.68 (1.20, 2.35) | 87/<br>13,398    | 9,936/<br>2,830,509   | 1.48 (1.18, 1.86)              |
| AD discontinuer referent       | 45/<br>6,745  | 155/<br>37,187        | 1.37 (0.94, 1.99) | 42/<br>6,663  | 52/<br>17,222        | 2.39 (1.56, 3.66) | 87/<br>13,408    | 207/<br>54,409        | 1.74 (1.32, 2.31)              |
| Escitalopram discontinuer ref  | 45/<br>6,709  | 14/<br>3,736          | 2.02 (1.00, 4.07) | 41/<br>6,655  | 6/<br>2,729          | 2.83 (1.11, 7.22) | 86/<br>13,364    | 20/<br>6,465          | 2.28 (1.30, 4.00)              |
| <b>Intellectual disability</b> |               |                       |                   |               |                      |                   |                  |                       |                                |
| Crude                          | 16/<br>6,865  | 2,930/<br>1,833,927   | 1.50 (0.92, 2.44) | 0/<br>6,668   | 81/<br>1,198,818     | -                 | 16/<br>6,865     | 2,930/<br>1,833,927   | 1.50 (0.92, 2.44) <sup>1</sup> |
| Adjusted                       | 16/<br>6,740  | 2,036/<br>1,634,187   | 1.19 (0.69, 2.04) | 0/<br>6,658   | 81/<br>1,196,322     | -                 | 16/<br>6,740     | 2,036/<br>1,634,187   | 1.19 (0.69, 2.04) <sup>1</sup> |
| AD discontinuer referent       | 16/<br>6,745  | 66/<br>37,187         | 1.20 (0.67, 2.15) | 0/<br>6,663   | 3/<br>17,222         | -                 | 16/<br>6,745     | 66/<br>37,187         | 1.20 (0.67, 2.15) <sup>1</sup> |
| Escitalopram discontinuer ref  | 16/<br>6,709  | <11/<br>3,736         | 0.54 (0.19, 1.56) | 0/<br>6,655   | 0/<br>2,729          | -                 | 16/<br>6,709     | <11/<br>3,736         | 0.54 (0.19, 1.56) <sup>1</sup> |
| <b>Behavioral disorder</b>     |               |                       |                   |               |                      |                   |                  |                       |                                |
| Crude                          | 265/<br>6,865 | 33,022/<br>1,833,927  | 2.30 (2.04, 2.60) | 30/<br>6,668  | 2,500/<br>1,198,818  | 2.09 (1.46, 3.00) | 295/<br>13,533   | 35,522/<br>3,032,745  | 2.28 (2.03, 2.56)              |
| Adjusted                       | 254/<br>6,740 | 25,737/<br>1,634,187  | 1.24 (1.08, 1.42) | 30/<br>6,658  | 2,497/<br>1,196,322  | 1.32 (0.90, 1.93) | 284/<br>13,398   | 28,234/<br>2,830,509  | 1.25 (1.09, 1.42)              |
| AD discontinuer referent       | 256/<br>6,745 | 953/<br>37,187        | 1.25 (1.07, 1.46) | 30/<br>6,663  | 55/<br>17,222        | 1.57 (0.98, 2.51) | 286/<br>13,408   | 1,008/<br>54,409      | 1.28 (1.10, 1.48)              |
| Escitalopram discontinuer ref  | 255/<br>6,709 | 101/<br>3,736         | 1.21 (0.81, 1.79) | 30/<br>6,655  | 10/<br>2,729         | 1.43 (0.62, 3.29) | 285/<br>13,364   | 111/<br>6,465         | 1.24 (0.87, 1.78)              |
| <b>Any NDD</b>                 |               |                       |                   |               |                      |                   |                  |                       |                                |
| Crude                          | 772/<br>6,865 | 110,036/<br>1,833,927 | 2.04 (1.90, 2.19) | 265/<br>6,668 | 28,668/<br>1,198,818 | 1.70 (1.51, 1.92) | 1,037/<br>13,533 | 138,704/<br>3,032,745 | 1.94 (1.83, 2.07)              |
| Adjusted                       | 753/<br>6,740 | 90,404/<br>1,634,187  | 1.22 (1.13, 1.32) | 265/<br>6,658 | 28,612/<br>1,196,322 | 1.29 (1.14, 1.47) | 1,018/<br>13,398 | 119,016/<br>2,830,509 | 1.24 (1.16, 1.33)              |
| AD discontinuer referent       | 755/<br>6,745 | 2,886/<br>37,187      | 1.18 (1.08, 1.30) | 265/<br>6,663 | 550/<br>17,222       | 1.30 (1.11, 1.52) | 1,020/<br>13,408 | 3,436/<br>54,409      | 1.21 (1.12, 1.31)              |
| Escitalopram discontinuer ref  | 751/<br>6,709 | 332/<br>3,736         | 1.27 (1.06, 1.52) | 264/<br>6,655 | 88/<br>2,729         | 1.34 (1.00, 1.79) | 1,015/<br>13,364 | 420/<br>6,465         | 1.29 (1.10, 1.50)              |

<sup>1</sup>Results include data from MAX only due to 0 exposed cases in MarketScan  
Event counts are obscured when <11 in MAX due to the CMS cell size suppression policy.

eTable 13. Characteristics of the cohort for individuals exposed to antidepressants during late pregnancy and individuals unexposed to antidepressants throughout pregnancy, in MAX, crude and propensity score weighted results

|                                                 | Crude                  |                |              | Weighted               |                  |              |
|-------------------------------------------------|------------------------|----------------|--------------|------------------------|------------------|--------------|
|                                                 | Antidepressant exposed | Unexposed      | Std Diff (%) | Antidepressant exposed | Unexposed        | Std Diff (%) |
| Age, mean (SD)                                  | 26.2 (5.7)             | 24.3 (5.8)     | 32.7         | 26.2 (5.7)             | 25.9 (5.7)       | 4.2          |
| Age categories, N (%)                           |                        |                |              |                        |                  |              |
| ≤19 years                                       | 10,732 (11.5)          | 430,668 (23.5) | -31.9        | 10,513 (11.5)          | 211,744 (11.7)   | -0.8         |
| 20-24 years                                     | 29,425 (31.6)          | 625,359 (34.1) | -5.3         | 28,768 (31.5)          | 579,238 (32.1)   | -1.4         |
| 25-29 years                                     | 28,248 (30.4)          | 439,890 (24.0) | 14.4         | 27,820 (30.4)          | 549,437 (30.5)   | -0.1         |
| 30-34 years                                     | 16,016 (17.2)          | 219,651 (12.0) | 14.9         | 15,793 (17.3)          | 304,407 (16.9)   | 1.0          |
| 35-39 years                                     | 6,995 (7.5)            | 93,761 (5.1)   | 9.9          | 6,891 (7.5)            | 127,748 (7.1)    | 1.7          |
| ≥40 years                                       | 1,653 (1.8)            | 24,598 (1.3)   | 3.5          | 1,627 (1.8)            | 29,868 (1.7)     | 0.9          |
| Race/ethnicity <sup>1</sup> , N (%)             |                        |                |              |                        |                  |              |
| Asian or other Pacific Islander                 | 883 (0.9)              | 73,042 (4.0)   | -19.7        | 880 (1.0)              | 13,209 (0.7)     | 2.5          |
| Black or African American                       | 13,642 (14.7)          | 645,600 (35.2) | -48.9        | 13,407 (14.7)          | 242,032 (13.4)   | 3.6          |
| Hispanic or Latino                              | 5,067 (5.4)            | 279,317 (15.2) | -32.6        | 5,042 (5.5)            | 85,047 (4.7)     | 3.6          |
| Unknown or other                                | 6,088 (6.5)            | 155,220 (8.5)  | -7.3         | 6,075 (6.6)            | 114,958 (6.4)    | 1.1          |
| White                                           | 67,389 (72.4)          | 680,748 (37.1) | 75.8         | 66,008 (72.2)          | 1,347,197 (74.7) | -5.7         |
| Region, N (%)                                   |                        |                |              |                        |                  |              |
| Midwest                                         | 40,940 (44.0)          | 560,645 (30.6) | 28.0         | 40,863 (44.7)          | 809,959 (44.9)   | -0.5         |
| Northeast                                       | 13,717 (14.7)          | 321,625 (17.5) | -7.6         | 13,677 (15.0)          | 263,136 (14.6)   | 1.0          |
| South                                           | 25,515 (27.4)          | 533,036 (29.1) | -3.7         | 23,998 (26.3)          | 484,369 (26.9)   | -1.4         |
| West                                            | 12,897 (13.9)          | 418,621 (22.8) | -23.3        | 12,874 (14.1)          | 244,978 (13.6)   | 1.4          |
| Delivery year, N (%)                            |                        |                |              |                        |                  |              |
| 2000                                            | 48 (0.1)               | 1,640 (0.1)    | -1.4         | 48 (0.1)               | 846 (0.0)        | 0.2          |
| 2001                                            | 2,800 (3.0)            | 78,560 (4.3)   | -6.8         | 2,792 (3.1)            | 53,117 (2.9)     | 0.6          |
| 2002                                            | 4,326 (4.6)            | 90,037 (4.9)   | -1.2         | 4,309 (4.7)            | 83,145 (4.6)     | 0.5          |
| 2003                                            | 6,980 (7.5)            | 116,621 (6.4)  | 4.5          | 6,944 (7.6)            | 133,777 (7.4)    | 0.7          |
| 2004                                            | 8,678 (9.3)            | 139,324 (7.6)  | 6.2          | 8,642 (9.5)            | 165,020 (9.2)    | 1.0          |
| 2005                                            | 7,630 (8.2)            | 140,037 (7.6)  | 2.1          | 7,361 (8.1)            | 142,902 (7.9)    | 0.5          |
| 2006                                            | 7,112 (7.6)            | 140,842 (7.7)  | -0.1         | 6,424 (7.0)            | 125,603 (7.0)    | 0.2          |
| 2007                                            | 6,700 (7.2)            | 133,786 (7.3)  | -0.4         | 6,210 (6.8)            | 121,967 (6.8)    | 0.1          |
| 2008                                            | 6,259 (6.7)            | 132,419 (7.2)  | -2.0         | 6,240 (6.8)            | 125,837 (7.0)    | -0.6         |
| 2009                                            | 8,113 (8.7)            | 154,377 (8.4)  | 1.1          | 8,089 (8.8)            | 161,389 (9.0)    | -0.4         |
| 2010                                            | 9,104 (9.8)            | 164,190 (9.0)  | 2.9          | 9,075 (9.9)            | 180,390 (10.0)   | -0.3         |
| 2011                                            | 8,579 (9.2)            | 175,765 (9.6)  | -1.3         | 8,562 (9.4)            | 173,056 (9.6)    | -0.8         |
| 2012                                            | 7,967 (8.6)            | 179,839 (9.8)  | -4.3         | 7,954 (8.7)            | 161,168 (8.9)    | -0.8         |
| 2013                                            | 5,892 (6.3)            | 129,523 (7.1)  | -2.9         | 5,883 (6.4)            | 116,409 (6.5)    | -0.1         |
| 2014                                            | 2,881 (3.1)            | 56,967 (3.1)   | -0.1         | 2,879 (3.1)            | 57,816 (3.2)     | -0.3         |
| Indications and mental health conditions, N (%) |                        |                |              |                        |                  |              |
| ADHD                                            | 2,934 (3.2)            | 10,889 (0.6)   | 19.0         | 2,901 (3.2)            | 60,698 (3.4)     | -1.1         |
| Adjustment disorder                             | 1,697 (1.8)            | 13,412 (0.7)   | 9.7          | 1,680 (1.8)            | 34,870 (1.9)     | -0.7         |

|                                                |               |                  |        |               |                  |      |
|------------------------------------------------|---------------|------------------|--------|---------------|------------------|------|
| Anxiety                                        | 24,222 (26.0) | 55,849 (3.0)     | 69.0   | 23,780 (26)   | 470,999 (26.1)   | -0.3 |
| Behavioral disorder                            | 1,372 (1.5)   | 13,908 (0.8)     | 6.8    | 1,357 (1.5)   | 28,593 (1.6)     | -0.8 |
| Bipolar disorder                               | 11,771 (12.6) | 25,178 (1.4)     | 45.3   | 11,525 (12.6) | 240,069 (13.3)   | -2.1 |
| Chronic fatigue                                | 8,597 (9.2)   | 68,411 (3.7)     | 22.5   | 8,443 (9.2)   | 169,432 (9.4)    | -0.6 |
| Depression, nonpsychotic                       | 17,686 (19.0) | 24,564 (1.3)     | 61.1   | 17,379 (19.0) | 317,160 (17.6)   | 3.7  |
| Depression, other                              | 34,195 (36.7) | 62,940 (3.4)     | 91.4   | 33,685 (36.8) | 651,747 (36.2)   | 1.4  |
| Depression, psychotic                          | 1,714 (1.8)   | 1,976 (0.1)      | 17.7   | 1,660 (1.8)   | 28,856 (1.6)     | 1.7  |
| Epilepsy/convulsion                            | 2,597 (2.8)   | 17,701 (1.0)     | 13.5   | 2,545 (2.8)   | 53,410 (3.0)     | -1.1 |
| Migraine/headache                              | 21,395 (23.0) | 196,252 (10.7)   | 33.3   | 20,941 (22.9) | 423,090 (23.5)   | -1.3 |
| Other developmental disorders <sup>2</sup>     | 626 (0.7)     | 5,194 (0.3)      | 5.7    | 618 (0.7)     | 12,095 (0.7)     | 0.1  |
| Other mental health disorders <sup>3</sup>     | 3,585 (3.9)   | 16,483 (0.9)     | 19.5   | 3,523 (3.9)   | 67,613 (3.8)     | 0.5  |
| Personality disorder                           | 1,958 (2.1)   | 3,085 (0.2)      | 18.3   | 1,935 (2.1)   | 34,904 (1.9)     | 1.3  |
| Psychosis                                      | 1,305 (1.4)   | 4,061 (0.2)      | 13.2   | 1,284 (1.4)   | 25,479 (1.4)     | -0.1 |
| Schizophrenia                                  | 1,218 (1.3)   | 2,726 (0.1)      | 13.7   | 1,198 (1.3)   | 25,137 (1.4)     | -0.7 |
| Sleep disorder                                 | 4,068 (4.4)   | 11,176 (0.6)     | 24.3   | 3,946 (4.3)   | 74,653 (4.1)     | 0.9  |
| Psychiatric visits, N (%)                      |               |                  |        |               |                  |      |
| 0 visits                                       | 79,476 (85.4) | 1,789,696 (97.6) | -44.8  | 78,087 (85.4) | 1,544,667 (85.7) | -0.8 |
| 1 visit                                        | 3,579 (3.8)   | 16,535 (0.9)     | 19.4   | 3,505 (3.8)   | 69,874 (3.9)     | -0.2 |
| 2-3 visits                                     | 3,662 (3.9)   | 11,254 (0.6)     | 22.4   | 3,563 (3.9)   | 69,549 (3.9)     | 0.2  |
| 4+ visits                                      | 6,352 (6.8)   | 16,442 (0.9)     | 31.1   | 6,257 (6.8)   | 118,352 (6.6)    | 1.1  |
| Mental health diagnoses, N (%)                 |               |                  |        |               |                  |      |
| 0 diagnoses                                    | 41,625 (44.7) | 1,625,054 (88.6) | -105.2 | 40,841 (44.7) | 783,859 (43.5)   | 2.4  |
| 1 diagnosis                                    | 18,301 (19.7) | 126,831 (6.9)    | 38.2   | 17,991 (19.7) | 387,512 (21.5)   | -4.5 |
| 2-3 diagnoses                                  | 20,981 (22.5) | 65,301 (3.6)     | 58.7   | 20,647 (22.6) | 419,729 (23.3)   | -1.7 |
| 4+ diagnoses                                   | 12,162 (13.1) | 16,741 (0.9)     | 49.1   | 11,933 (13.1) | 211,342 (11.7)   | 4.0  |
| Mental health ER visits, N (%)                 |               |                  |        |               |                  |      |
| 0 visits                                       | 85,412 (91.8) | 1,803,275 (98.3) | -30.6  | 83,891 (91.8) | 1,658,892 (92.0) | -1.0 |
| 1 visit                                        | 5,224 (5.6)   | 25,482 (1.4)     | 23.1   | 5,125 (5.6)   | 101,930 (5.7)    | -0.2 |
| 2-3 visits                                     | 2,084 (2.2)   | 4,819 (0.3)      | 17.9   | 2,048 (2.2)   | 36,664 (2.0)     | 1.4  |
| 4+ visits                                      | 349 (0.4)     | 351 (0.0)        | 8.0    | 348 (0.4)     | 4,956 (0.3)      | 1.8  |
| Mental health hospitalizations, N (%)          |               |                  |        |               |                  |      |
| 0 visits                                       | 87,502 (94.0) | 1,816,957 (99.1) | -28.0  | 86,052 (94.1) | 1,704,413 (94.6) | -1.8 |
| 1 visit                                        | 2,562 (2.8)   | 11,636 (0.6)     | 16.5   | 2,435 (2.7)   | 46,262 (2.6)     | 0.6  |
| 2-3 visits                                     | 1,976 (2.1)   | 4,248 (0.2)      | 17.6   | 1,922 (2.1)   | 34,228 (1.9)     | 1.5  |
| 4+ visits                                      | 1,029 (1.1)   | 1,086 (0.1)      | 13.8   | 1,003 (1.1)   | 17,539 (1.0)     | 1.2  |
| Other psychiatric medications, N (%)           |               |                  |        |               |                  |      |
| 0 drugs                                        | 71,611 (76.9) | 1,790,601 (97.6) | -65.4  | 70,360 (77.0) | 1,402,168 (77.8) | -2.0 |
| 1 drug                                         | 7,183 (7.7)   | 21,778 (1.2)     | 32.1   | 7,032 (7.7)   | 143,901 (8.0)    | -1.1 |
| 2-3 drugs                                      | 10,354 (11.1) | 17,799 (1.0)     | 43.6   | 10,178 (11.1) | 192,392 (10.7)   | 1.5  |
| 4+ drugs                                       | 3,921 (4.2)   | 3,749 (0.2)      | 27.5   | 3,842 (4.2)   | 63,981 (3.5)     | 3.4  |
| Outpatient visits (based on quartiles) , N (%) |               |                  |        |               |                  |      |
| Low                                            | 10,363 (11.1) | 508,142 (27.7)   | -42.8  | 10,154 (11.1) | 183,808 (10.2)   | 3.0  |
| Low to moderate                                | 16,491 (17.7) | 509,272 (27.8)   | -24.2  | 16,129 (17.6) | 310,264 (17.2)   | 1.1  |

|                                                  |               |                  |       |               |                  |      |
|--------------------------------------------------|---------------|------------------|-------|---------------|------------------|------|
| Moderate to high                                 | 17,820 (19.1) | 380,976 (20.8)   | -4.1  | 17,485 (19.1) | 353,544 (19.6)   | -1.2 |
| High                                             | 48,395 (52.0) | 435,537 (23.7)   | 60.9  | 47,644 (52.1) | 954,826 (53.0)   | -1.7 |
| Hospitalizations, N (%)                          |               |                  |       |               |                  |      |
| 0 visits                                         | 80,818 (86.8) | 1,685,214 (91.9) | -16.5 | 80,031 (87.5) | 1,580,183 (87.7) | -0.4 |
| 1 visit                                          | 7,877 (8.5)   | 99,464 (5.4)     | 12.0  | 7,618 (8.3)   | 148,921 (8.3)    | 0.3  |
| 2-3 visits                                       | 2,802 (3.0)   | 32,966 (1.8)     | 7.9   | 2,482 (2.7)   | 47,196 (2.6)     | 0.6  |
| 4+ visits                                        | 1,572 (1.7)   | 16,283 (0.9)     | 7.1   | 1,281 (1.4)   | 26,142 (1.5)     | -0.4 |
| Lifestyle behaviors/environmental, N (%)         |               |                  |       |               |                  |      |
| Alcohol abuse                                    | 3,363 (3.6)   | 13,921 (0.8)     | 19.6  | 3,312 (3.6)   | 62,401 (3.5)     | 0.9  |
| Tobacco use                                      | 17,583 (18.9) | 137,823 (7.5)    | 34.1  | 17,277 (18.9) | 358,061 (19.9)   | -2.4 |
| Substance abuse                                  | 10,385 (11.2) | 52,472 (2.9)     | 32.9  | 10,202 (11.2) | 202,740 (11.2)   | -0.3 |
| Hyperemesis/nausea and vomiting in pregnancy     | 25,557 (27.5) | 312,755 (17.1)   | 25.2  | 25,018 (27.4) | 505,683 (28.1)   | -1.5 |
| Poor nutrition                                   | 2,270 (2.4)   | 24,001 (1.3)     | 8.3   | 2,244 (2.5)   | 44,608 (2.5)     | -0.1 |
| Start of prenatal care, gestational month, N (%) |               |                  |       |               |                  |      |
| Month 1                                          | 5,311 (5.7)   | 79,729 (4.3)     | 6.2   | 5,240 (5.7)   | 103,980 (5.8)    | -0.2 |
| Month 2                                          | 34,152 (36.7) | 527,048 (28.7)   | 17.0  | 33,626 (36.8) | 672,353 (37.3)   | -1.1 |
| Month 3                                          | 22,504 (24.2) | 401,997 (21.9)   | 5.4   | 22,158 (24.2) | 438,881 (24.3)   | -0.3 |
| Month 4                                          | 9,552 (10.3)  | 217,529 (11.9)   | -5.1  | 9,373 (10.3)  | 183,136 (10.2)   | 0.3  |
| Month 5                                          | 5,963 (6.4)   | 143,688 (7.8)    | -5.6  | 5,833 (6.4)   | 113,579 (6.3)    | 0.3  |
| Month 6                                          | 3,125 (3.4)   | 90,590 (4.9)     | -7.9  | 3,055 (3.3)   | 58,189 (3.2)     | 0.6  |
| Month 7                                          | 2,483 (2.7)   | 67,782 (3.7)     | -5.9  | 2,421 (2.6)   | 47,571 (2.6)     | 0.1  |
| Month 8                                          | 1,621 (1.7)   | 46,639 (2.5)     | -5.5  | 1,583 (1.7)   | 30,362 (1.7)     | 0.4  |
| Month 9                                          | 1,574 (1.7)   | 46,321 (2.5)     | -5.8  | 1,533 (1.7)   | 29,144 (1.6)     | 0.5  |
| No prenatal care                                 | 6,784 (7.3)   | 212,604 (11.6)   | -14.8 | 6,590 (7.2)   | 125,247 (6.9)    | 1.0  |
| Prenatal care index, N (%)                       |               |                  |       |               |                  |      |
| Adequate plus                                    | 22,558 (24.2) | 413,909 (22.6)   | 3.9   | 22,401 (24.5) | 444,761 (24.7)   | 0.1  |
| Adequate                                         | 12,884 (13.8) | 235,059 (12.8)   | 3.0   | 12,731 (13.9) | 250,208 (13.9)   | -0.4 |
| Intermediate                                     | 15,617 (16.8) | 238,691 (13.0)   | 10.6  | 15,344 (16.8) | 303,141 (16.8)   | -0.1 |
| Inadequate                                       | 42,010 (45.1) | 946,268 (51.6)   | -13.0 | 40,936 (44.8) | 804,333 (44.6)   | 0.3  |
| Start of prenatal vitamins, N (%)                |               |                  |       |               |                  |      |
| 3 <sup>rd</sup> month prior to LMP               | 1,052 (1.1)   | 13,532 (0.7)     | 4.1   | 2,264 (2.5)   | 44,651 (2.5)     | 0.2  |
| 2 <sup>nd</sup> month prior to LMP               | 1,339 (1.4)   | 18,821 (1.0)     | 3.7   | 1,307 (1.4)   | 24,930 (1.4)     | 0.4  |
| 1 <sup>st</sup> month prior to LMP               | 2,310 (2.5)   | 31,059 (1.7)     | 5.5   | 1,037 (1.1)   | 20,032 (1.1)     | 0.0  |
| Month 1                                          | 6,595 (7.1)   | 97,643 (5.3)     | 7.3   | 6,480 (7.1)   | 127,115 (7.1)    | 0.1  |
| Month 2                                          | 24,931 (26.8) | 419,250 (22.9)   | 9.1   | 24,409 (26.7) | 478,693 (26.6)   | 0.3  |
| Month 3                                          | 12,865 (13.8) | 252,858 (13.8)   | 0.1   | 12,604 (13.8) | 246,570 (13.7)   | 0.3  |
| Month 4                                          | 6,408 (6.9)   | 142,940 (7.8)    | -3.5  | 6,299 (6.9)   | 122,562 (6.8)    | 0.4  |
| Month 5                                          | 4,267 (4.6)   | 97,744 (5.3)     | -3.4  | 4,194 (4.6)   | 83,237 (4.6)     | -0.1 |
| Month 6                                          | 2,975 (3.2)   | 69,105 (3.8)     | -3.1  | 2,918 (3.2)   | 56,093 (3.1)     | 0.5  |
| Month 7                                          | 2,071 (2.2)   | 49,978 (2.7)     | -3.2  | 2,025 (2.2)   | 40,614 (2.3)     | -0.3 |
| Month 8                                          | 1,260 (1.4)   | 31,773 (1.7)     | -3.1  | 1,234 (1.3)   | 24,376 (1.4)     | 0.0  |
| Month 9                                          | 580 (0.6)     | 14,481 (0.8)     | -2.0  | 574 (0.6)     | 11,334 (0.6)     | 0.0  |
| No prenatal vitamins                             | 26,416 (28.4) | 594,743 (32.4)   | -8.8  | 26,067 (28.5) | 522,235 (29.0)   | -1.0 |

|                                                                                               |               |                  |       |               |                  |      |
|-----------------------------------------------------------------------------------------------|---------------|------------------|-------|---------------|------------------|------|
| Comorbidities, N (%)                                                                          |               |                  |       |               |                  |      |
| Asthma                                                                                        | 11,205 (12.0) | 120,900 (6.6)    | 18.8  | 11,019 (12.1) | 225,042 (12.5)   | -1.3 |
| Autoimmune disorder                                                                           | 1,898 (2.0)   | 17,036 (0.9)     | 9.2   | 1,879 (2.1)   | 36,352 (2.0)     | 0.3  |
| Pregestational diabetes                                                                       | 8,254 (8.9)   | 102,479 (5.6)    | 12.7  | 8,131 (8.9)   | 159,033 (8.8)    | 0.3  |
| GBS infection                                                                                 | 4,356 (4.7)   | 98,841 (5.4)     | -3.2  | 4,292 (4.7)   | 83,521 (4.6)     | 0.3  |
| Pregestational hypertension                                                                   | 6,845 (7.4)   | 81,845 (4.5)     | 12.3  | 6,728 (7.4)   | 134,880 (7.5)    | -0.5 |
| Influenza                                                                                     | 1,769 (1.9)   | 22,842 (1.2)     | 5.3   | 1,734 (1.9)   | 35,218 (2.0)     | -0.4 |
| Other STD infection                                                                           | 4,514 (4.9)   | 90,026 (4.9)     | -0.3  | 4,416 (4.8)   | 91,779 (5.1)     | -1.2 |
| Overweight/obesity                                                                            | 7,192 (7.7)   | 104,081 (5.7)    | 8.2   | 7,107 (7.8)   | 141,586 (7.9)    | -0.3 |
| Renal disease                                                                                 | 392 (0.4)     | 4,655 (0.3)      | 2.9   | 390 (0.4)     | 8,113 (0.5)      | -0.4 |
| TORCH infection                                                                               | 3,673 (3.9)   | 82,566 (4.5)     | -2.8  | 3,625 (4.0)   | 70,940 (3.9)     | 0.2  |
| Obstetric Comorbidity Index <sup>4</sup> , N (%)                                              |               |                  |       |               |                  |      |
| 0                                                                                             | 38,972 (41.9) | 1,027,424 (56.0) | -28.6 | 38,258 (41.9) | 748,021 (41.5)   | 0.7  |
| 1                                                                                             | 21,941 (23.6) | 411,137 (22.4)   | 2.8   | 21,548 (23.6) | 425,094 (23.6)   | 0.0  |
| 2                                                                                             | 15,169 (16.3) | 209,624 (11.4)   | 14.1  | 14,895 (16.3) | 297,210 (16.5)   | -0.5 |
| 3+                                                                                            | 16,987 (18.3) | 185,742 (10.1)   | 23.4  | 16,711 (18.3) | 332,117 (18.4)   | -0.4 |
| Other prescription medications, N (%)                                                         |               |                  |       |               |                  |      |
| Anticonvulsants                                                                               | 10,448 (11.2) | 26,298 (1.4)     | 41.1  | 10,232 (11.2) | 198,681 (11.0)   | 0.5  |
| Antidiabetics                                                                                 | 3,262 (3.5)   | 31,978 (1.7)     | 11.0  | 3,203 (3.5)   | 64,079 (3.6)     | -0.3 |
| Antihypertensives                                                                             | 11,952 (12.8) | 94,612 (5.2)     | 27.1  | 11,724 (12.8) | 233,418 (13.0)   | -0.4 |
| Antipsychotics                                                                                | 10,287 (11.1) | 10,544 (0.6)     | 45.9  | 10,078 (11.0) | 187,148 (10.4)   | 2.1  |
| Anxiolytics                                                                                   | 3,834 (4.1)   | 4,654 (0.3)      | 26.7  | 3,754 (4.1)   | 70,546 (3.9)     | 1.0  |
| Barbiturates                                                                                  | 6,501 (7.0)   | 37,279 (2.0)     | 24.0  | 6,329 (6.9)   | 131,077 (7.3)    | -1.4 |
| Benzodiazepines                                                                               | 19,269 (20.7) | 33,710 (1.8)     | 62.5  | 18,949 (20.7) | 356,608 (19.8)   | 2.4  |
| Corticosteroids                                                                               | 27,599 (29.7) | 323,243 (17.6)   | 28.6  | 27,080 (29.6) | 539,155 (29.9)   | -0.6 |
| Insulin                                                                                       | 3,456 (3.7)   | 33,743 (1.8)     | 11.4  | 3,406 (3.7)   | 66,692 (3.7)     | 0.1  |
| NSAIDs                                                                                        | 32,338 (34.7) | 407,602 (22.2)   | 28.0  | 31,658 (34.6) | 629,920 (34.9)   | -0.7 |
| Opioids                                                                                       | 52,341 (56.2) | 532,059 (29.0)   | 57.3  | 51,244 (56.1) | 1,047,114 (58.1) | -4.1 |
| Other hypnotics                                                                               | 20,998 (22.6) | 117,732 (6.4)    | 47.1  | 20,599 (22.5) | 394,114 (21.9)   | 1.6  |
| OAD treatment                                                                                 | 2,093 (2.2)   | 6,075 (0.3)      | 17.1  | 2,081 (2.3)   | 41,312 (2.3)     | -0.1 |
| Progestins                                                                                    | 6,837 (7.3)   | 88,632 (4.8)     | 10.5  | 6,673 (7.3)   | 133,869 (7.4)    | -0.5 |
| Psychostimulants                                                                              | 3,650 (3.9)   | 9,315 (0.5)      | 23.4  | 3,597 (3.9)   | 70,698 (3.9)     | 0.1  |
| Known teratogens                                                                              | 1,360 (1.5)   | 5,418 (0.3)      | 12.5  | 1,336 (1.5)   | 27,384 (1.5)     | -0.5 |
| Suspected teratogens                                                                          | 24,741 (26.6) | 310,428 (16.9)   | 23.6  | 24,196 (26.5) | 485,898 (27.0)   | -1.1 |
| Triptans                                                                                      | 3,709 (4.0)   | 15,586 (0.8)     | 20.5  | 3,617 (4.0)   | 70,969 (3.9)     | 0.1  |
| Proximity to metropolitan area, N (%)                                                         |               |                  |       |               |                  |      |
| Metropolitan                                                                                  | 72,509 (79.3) | 1,570,850 (87.0) | -20.6 | 72,481 (79.3) | 1,415,322 (78.5) | 1.9  |
| Non-metropolitan                                                                              | 16,269 (17.8) | 201,130 (11.1)   | 19.0  | 16,257 (17.8) | 333,597 (18.5)   | -1.9 |
| Rural                                                                                         | 2,675 (2.9)   | 34,555 (1.9)     | 6.6   | 2,674 (2.9)   | 53,522 (3.0)     | -0.3 |
| Percentage of Population with ≤ High School Diploma (Based on Quartiles) <sup>5</sup> , N (%) |               |                  |       |               |                  |      |
| Low                                                                                           | 26,385 (28.9) | 445,850 (24.7)   | 9.4   | 26,373 (28.9) | 520,614 (28.9)   | -0.1 |
| Low to moderate                                                                               | 19,671 (21.5) | 467,409 (25.9)   | -10.3 | 19,664 (21.5) | 379,021 (21.0)   | 1.2  |

|                                                             |               |                |       |               |                |      |
|-------------------------------------------------------------|---------------|----------------|-------|---------------|----------------|------|
| Moderate to high                                            | 20,173 (22.1) | 457,015 (25.3) | -7.7  | 20,167 (22.1) | 392,553 (21.8) | 0.7  |
| High                                                        | 25,221 (27.6) | 435,258 (24.1) | 7.9   | 25,208 (27.6) | 510,254 (28.3) | -1.6 |
| Poverty Rate (Based on Quartiles) <sup>5</sup> , N (%)      |               |                |       |               |                |      |
| Low                                                         | 31,217 (34.1) | 439,567 (24.3) | 21.7  | 31,201 (34.1) | 618,924 (34.3) | -0.4 |
| Low to moderate                                             | 20,687 (22.6) | 457,336 (25.3) | -6.4  | 20,681 (22.6) | 400,597 (22.2) | 1.0  |
| Moderate to high                                            | 24,742 (27.1) | 441,735 (24.5) | 5.9   | 24,733 (27.1) | 498,536 (27.7) | -1.4 |
| High                                                        | 14,802 (16.2) | 466,863 (25.9) | -23.9 | 14,797 (16.2) | 284,385 (15.8) | 1.1  |
| Unemployment Rate (Based on Quartiles) <sup>5</sup> , N (%) |               |                |       |               |                |      |
| Low                                                         | 31,409 (34.3) | 437,740 (24.2) | 22.3  | 31,391 (34.3) | 628,583 (34.9) | -1.1 |
| Low to moderate                                             | 24,097 (26.4) | 436,584 (24.2) | 5.0   | 24,091 (26.4) | 477,731 (26.5) | -0.3 |
| Moderate to high                                            | 18,176 (19.9) | 479,454 (26.6) | -15.9 | 18,170 (19.9) | 349,612 (19.4) | 1.2  |
| High                                                        | 17,767 (19.4) | 451,746 (25.0) | -13.5 | 17,760 (19.4) | 346,517 (19.2) | 0.5  |
| Additional post-delivery variables <sup>6</sup>             |               |                |       |               |                |      |
| Well-child visits up to year 1                              | 7.0 (4.2)     | 6.8 (4.2)      | 5.8   |               |                |      |
| Well-child visits up to year 4                              | 9.2 (4.5)     | 9.0 (4.6)      | 4.6   |               |                |      |

<sup>1</sup>Race/ethnicity was determined based on information submitted to the Centers for Medicare & Medicaid Services by individual states, which was based on information that had been collected and coded from Medicaid applications.

<sup>2</sup>Other neurodevelopmental disorders include autism spectrum disorder, speech/language disorder, developmental coordination disorder, intellectual disability, and specific learning disorder.

<sup>3</sup>Other mental health disorders include delirium, dementia, tic disorder, somatoform spectrum disorder, eating disorder, psychotherapy, self-inflicted injury.

<sup>4</sup>As defined by Bateman et al. (2013): Development of a comorbidity index for use in obstetric patients.<sup>1</sup>

<sup>5</sup>County-level SES-measures were assessed after linkage of zip codes (only available in MAX) with corresponding FIPS county codes using crosswalk files provided by the US Department of Housing and Urban Development; these FIPS codes were then used to merge the MAX data with data provided by the US Department of Agriculture which include county-level information on various SES-measures. Metropolitan area is defined as counties in metropolitan areas or counties with urban population of 20,000 or more, adjacent to a metropolitan area; urban area is defined as counties with urban population of 20,000 or more, not adjacent to a metropolitan area, or counties with populations of 2,500 to 19,999 residents; rural area is defined as counties with a population of less than 2,500. Categories of unemployment rate, poverty rate and rate of educational attainment reflect year-specific quartiles.

<sup>6</sup>These variables were not included in the propensity score, therefore are not reported for the weighted results

eTable 14. Characteristics of the cohort for individuals exposed to antidepressants during late pregnancy and individuals unexposed to antidepressants throughout pregnancy, in MarketScan, crude and propensity score weighted results

|                                                 | Crude                  |                |              | Weighted               |                |              |
|-------------------------------------------------|------------------------|----------------|--------------|------------------------|----------------|--------------|
|                                                 | Antidepressant exposed | Unexposed      | Std Diff (%) | Antidepressant exposed | Unexposed      | Std Diff (%) |
| Age, mean (SD)                                  | 32.7 (4.6)             | 31.9 (4.6)     | 17.7         | 32.7 (4.6)             | 32.7 (4.6)     | 0.5          |
| Age categories, N (%)                           |                        |                |              |                        |                |              |
| ≤19 years                                       | 83 (0.2)               | 3,166 (0.3)    | -2.3         | 83 (0.2)               | 2,315 (0.2)    | -0.8         |
| 20-24 years                                     | 1,576 (3.0)            | 52,584 (4.4)   | -7.4         | 1,575 (3.0)            | 36,574 (3.1)   | -0.3         |
| 25-29 years                                     | 11,387 (21.6)          | 316,956 (26.4) | -11.3        | 11,377 (21.6)          | 253,822 (21.2) | 1.1          |
| 30-34 years                                     | 21,305 (40.5)          | 486,489 (40.6) | -0.2         | 21,294 (40.5)          | 485,130 (40.5) | 0.0          |
| 35-39 years                                     | 14,465 (27.5)          | 272,351 (22.7) | 11.0         | 14,444 (27.5)          | 331,580 (27.7) | -0.4         |
| ≥40 years                                       | 3,817 (7.3)            | 67,272 (5.6)   | 6.7          | 3,812 (7.2)            | 88,963 (7.4)   | -0.7         |
| Region, N (%)                                   |                        |                |              |                        |                |              |
| Midwest                                         | 15,954 (30.3)          | 305,958 (25.5) | 10.7         | 15,940 (30.3)          | 359,757 (30.0) | 0.6          |
| Northeast                                       | 6,709 (12.7)           | 191,501 (16.0) | -9.2         | 6,706 (12.8)           | 149,932 (12.5) | 0.7          |
| South                                           | 21,250 (40.4)          | 470,808 (39.3) | 2.3          | 21,227 (40.4)          | 488,702 (40.8) | -0.8         |
| West                                            | 8,033 (15.3)           | 216,743 (18.1) | -7.6         | 8,026 (15.3)           | 184,621 (15.4) | -0.4         |
| Delivery year, N (%)                            |                        |                |              |                        |                |              |
| 2003                                            | 56 (0.1)               | 946 (0.1)      | 0.9          | 56 (0.1)               | 1,324 (0.1)    | -0.1         |
| 2004                                            | 2,220 (4.2)            | 49,945 (4.2)   | 0.3          | 2,220 (4.2)            | 51,471 (4.3)   | -0.4         |
| 2005                                            | 3,016 (5.7)            | 64,374 (5.4)   | 1.6          | 3,012 (5.7)            | 69,521 (5.8)   | -0.3         |
| 2006                                            | 3,176 (6.0)            | 65,869 (5.5)   | 2.3          | 3,175 (6.0)            | 73,423 (6.1)   | -0.4         |
| 2007                                            | 3,713 (7.1)            | 80,740 (6.7)   | 1.3          | 3,711 (7.1)            | 84,515 (7.1)   | 0.0          |
| 2008                                            | 4,342 (8.2)            | 92,998 (7.8)   | 1.8          | 4,336 (8.2)            | 98,829 (8.2)   | 0.0          |
| 2009                                            | 6,246 (11.9)           | 131,938 (11.0) | 2.7          | 6,241 (11.9)           | 141,187 (11.8) | 0.3          |
| 2010                                            | 6,172 (11.7)           | 130,341 (10.9) | 2.7          | 6,166 (11.7)           | 140,087 (11.7) | 0.1          |
| 2011                                            | 6,629 (12.6)           | 14,4347 (12.0) | 1.7          | 6,621 (12.6)           | 150,821 (12.6) | 0.0          |
| 2012                                            | 5,613 (10.7)           | 149,693 (12.5) | -5.7         | 5,609 (10.7)           | 127,508 (10.6) | 0.1          |
| 2013                                            | 4,728 (9.0)            | 121,388 (10.1) | -3.9         | 4,722 (9.0)            | 106,583 (8.9)  | 0.3          |
| 2014                                            | 4,653 (8.8)            | 116,079 (9.7)  | -2.9         | 4,649 (8.8)            | 106,973 (8.9)  | -0.3         |
| 2015                                            | 2,069 (3.9)            | 50,160 (4.2)   | -1.3         | 2,067 (3.9)            | 46,144 (3.9)   | 0.4          |
| Indications and mental health conditions, N (%) |                        |                |              |                        |                |              |
| ADHD                                            | 1,019 (1.9)            | 4,351 (0.4)    | 14.8         | 1,018 (1.9)            | 24,270 (2.0)   | -0.6         |
| Adjustment disorder                             | 581 (1.1)              | 3,449 (0.3)    | 9.8          | 580 (1.1)              | 14,073 (1.2)   | -0.7         |
| Anxiety                                         | 12,349 (23.5)          | 27,316 (2.3)   | 66.7         | 12,303 (23.4)          | 295,585 (24.7) | -3.0         |
| Behavioral disorder                             | 77 (0.1)               | 189 (0.0)      | 4.6          | 75 (0.1)               | 1,676 (0.1)    | 0.1          |
| Bipolar disorder                                | 2,119 (4.0)            | 2,756 (0.2)    | 26.5         | 2,095 (4.0)            | 50,124 (4.2)   | -1.0         |
| Chronic fatigue                                 | 5,373 (10.2)           | 57,829 (4.8)   | 20.5         | 5,354 (10.2)           | 131,212 (10.9) | -2.5         |
| Depression, nonpsychotic                        | 8,044 (15.3)           | 7,021 (0.6)    | 56.5         | 7,997 (15.2)           | 156,335 (13.0) | 6.2          |
| Depression, other                               | 13,001 (24.7)          | 26,045 (2.2)   | 70           | 12,954 (24.6)          | 294,947 (24.6) | 0.1          |
| Depression, psychotic                           | 141 (0.3)              | 82 (0.0)       | 7.1          | 137 (0.3)              | 2,409 (0.2)    | 1.2          |
| Epilepsy/convulsion                             | 446 (0.8)              | 4,936 (0.4)    | 5.5          | 445 (0.8)              | 10,507 (0.9)   | -0.3         |



|                                                |               |                  |       |               |                  |      |
|------------------------------------------------|---------------|------------------|-------|---------------|------------------|------|
| Migraine/headache                              | 7,099 (13.5)  | 72,814 (6.1)     | 25.2  | 7,077 (13.5)  | 172,209 (14.4)   | -2.6 |
| Other developmental disorders <sup>1</sup>     | 37 (0.1)      | 219 (0.0)        | 2.5   | 36 (0.1)      | 729 (0.1)        | 0.3  |
| Other mental health disorders <sup>2</sup>     | 1,087 (2.1)   | 6,402 (0.5)      | 13.6  | 1,084 (2.1)   | 26,484 (2.2)     | -1.0 |
| Personality disorder                           | 203 (0.4)     | 260 (0.0)        | 8.1   | 198 (0.4)     | 4,585 (0.4)      | -0.1 |
| Psychosis                                      | 145 (0.3)     | 476 (0.0)        | 6.0   | 143 (0.3)     | 3,447 (0.3)      | -0.3 |
| Schizophrenia                                  | 51 (0.1)      | 93 (0.0)         | 3.9   | 50 (0.1)      | 1,042 (0.1)      | 0.3  |
| Sleep disorder                                 | 2,312 (4.4)   | 8,935 (0.7)      | 23.2  | 2,300 (4.4)   | 55,070 (4.6)     | -1.1 |
| Psychiatric visits, N (%)                      |               |                  |       |               |                  |      |
| 0 visits                                       | 42,389 (80.5) | 1,167,770 (97.4) | -55.9 | 42,361 (80.6) | 956,283 (79.8)   | 1.9  |
| 1 visit                                        | 1,791 (3.4)   | 5,769 (0.5)      | 21.3  | 1,788 (3.4)   | 42,893 (3.6)     | -1.0 |
| 2-3 visits                                     | 2,492 (4.7)   | 7,052 (0.6)      | 26.0  | 2,489 (4.7)   | 57,551 (4.8)     | -0.3 |
| 4+ visits                                      | 5,961 (11.3)  | 18,227 (1.5)     | 40.8  | 5,947 (11.3)  | 141,658 (11.8)   | -1.6 |
| Mental health diagnoses, N (%)                 |               |                  |       |               |                  |      |
| 0 diagnoses                                    | 29,921 (56.8) | 1,137,078 (94.8) | -99.1 | 29,920 (56.9) | 665,946 (55.6)   | 2.7  |
| 1 diagnosis                                    | 9,763 (18.5)  | 37,534 (3.1)     | 51.2  | 9,760 (18.6)  | 250,679 (20.9)   | -5.9 |
| 2-3 diagnoses                                  | 9,940 (18.9)  | 21,930 (1.8)     | 58.3  | 9,924 (18.9)  | 224,539 (18.7)   | 0.3  |
| 4+ diagnoses                                   | 3,009 (5.7)   | 2,276 (0.2)      | 33.1  | 2,981 (5.7)   | 57,222 (4.8)     | 4.0  |
| Mental health ER visits, N (%)                 |               |                  |       |               |                  |      |
| 0 visits                                       | 51,070 (97.0) | 1,194,008 (99.6) | -20.1 | 51,028 (97.0) | 1,164,116 (97.1) | -0.6 |
| 1 visit                                        | 1,099 (2.1)   | 4,134 (0.3)      | 16.0  | 1,095 (2.1)   | 25,355 (2.1)     | -0.2 |
| 2-3 visits                                     | 360 (0.7)     | 592 (0.0)        | 10.5  | 359 (0.7)     | 7,033 (0.6)      | 1.2  |
| 4+ visits                                      | 104 (0.2)     | 84 (0.0)         | 6.0   | 103 (0.2)     | 1,881 (0.2)      | 0.9  |
| Mental health hospitalizations, N (%)          |               |                  |       |               |                  |      |
| 0 visits                                       | 51,786 (98.4) | 1,197,533 (99.9) | -16.3 | 51,746 (98.4) | 1,181,366 (98.6) | -1.4 |
| 1 visit                                        | 410 (0.8)     | 787 (0.1)        | 11.0  | 407 (0.8)     | 8,765 (0.7)      | 0.5  |
| 2-3 visits                                     | 319 (0.6)     | 418 (0.0)        | 10.1  | 317 (0.6)     | 6,074 (0.5)      | 1.3  |
| 4+ visits                                      | 118 (0.2)     | 80 (0.0)         | 6.4   | 115 (0.2)     | 2,181 (0.2)      | 0.8  |
| Other psychiatric medications, N (%)           |               |                  |       |               |                  |      |
| 0 drugs                                        | 45,778 (87.0) | 1,179,946 (98.4) | -45.1 | 45,772 (87.0) | 1,049,419 (87.6) | -1.6 |
| 1 drug                                         | 2,773 (5.3)   | 9,403 (0.8)      | 26.4  | 2,762 (5.3)   | 63,468 (5.3)     | -0.2 |
| 2-3 drugs                                      | 3,383 (6.4)   | 8,688 (0.7)      | 31.1  | 3,367 (6.4)   | 72,850 (6.1)     | 1.3  |
| 4+ drugs                                       | 699 (1.3)     | 781 (0.1)        | 15.2  | 684 (1.3)     | 12,649 (1.1)     | 2.3  |
| Outpatient visits (based on quartiles) , N (%) |               |                  |       |               |                  |      |
| Low                                            | 6,806 (12.9)  | 310,792 (25.9)   | -33.3 | 6,806 (12.9)  | 140,218 (11.7)   | 3.8  |
| Low to moderate                                | 8,996 (17.1)  | 293,089 (24.4)   | -18.2 | 8,995 (17.1)  | 197,864 (16.5)   | 1.6  |
| Moderate to high                               | 15,555 (29.6) | 338,871 (28.3)   | 2.8   | 15,547 (29.6) | 358,499 (29.9)   | -0.8 |
| High                                           | 21,276 (40.4) | 256,066 (21.4)   | 42.2  | 21,237 (40.4) | 501,804 (41.9)   | -3.0 |
| Hospitalizations, N (%)                        |               |                  |       |               |                  |      |
| 0 visits                                       | 50,238 (95.4) | 1,171,261 (97.7) | -12.4 | 50,199 (95.5) | 1,143,802 (95.4) | 0.1  |
| 1 visit                                        | 1,615 (3.1)   | 19,832 (1.7)     | 9.3   | 1,609 (3.1)   | 37,103 (3.1)     | -0.2 |
| 2-3 visits                                     | 503 (1.0)     | 5,401 (0.5)      | 6.1   | 501 (1.0)     | 11,127 (0.9)     | 0.3  |
| 4+ visits                                      | 277 (0.5)     | 2,324 (0.2)      | 5.6   | 276 (0.5)     | 6,353 (0.5)      | -0.1 |
| Lifestyle behaviors/environmental, N (%)       |               |                  |       |               |                  |      |

|                                                  |               |                |      |               |                |      |
|--------------------------------------------------|---------------|----------------|------|---------------|----------------|------|
| Alcohol abuse                                    | 304 (0.6)     | 806 (0.1)      | 9.0  | 298 (0.6)     | 6,178 (0.5)    | 0.7  |
| Tobacco use                                      | 1,497 (2.8)   | 12,022 (1.0)   | 13.4 | 1,490 (2.8)   | 36,928 (3.1)   | -1.5 |
| Substance abuse                                  | 524 (1.0)     | 1,728 (0.1)    | 11.3 | 521 (1.0)     | 11,770 (1.0)   | 0.1  |
| Hyperemesis/nausea and vomiting in pregnancy     | 7,380 (14.0)  | 91,317 (7.6)   | 20.7 | 7,362 (14.0)  | 174,710 (14.6) | -1.7 |
| Poor nutrition                                   | 1,472 (2.8)   | 21,543 (1.8)   | 6.7  | 1,467 (2.8)   | 35,452 (3.0)   | -1.0 |
| Start of prenatal care, gestational month, N (%) |               |                |      |               |                |      |
| Month 1                                          | 3,337 (6.3)   | 78,597 (6.6)   | -0.9 | 3,336 (6.3)   | 78,567 (6.6)   | -0.9 |
| Month 2                                          | 22,376 (42.5) | 486,566 (40.6) | 3.9  | 22,358 (42.5) | 514,091 (42.9) | -0.8 |
| Month 3                                          | 13,231 (25.1) | 291,038 (24.3) | 2    | 13,212 (25.1) | 298,573 (24.9) | 0.5  |
| Month 4                                          | 3,100 (5.9)   | 74,124 (6.2)   | -1.2 | 3,099 (5.9)   | 68,961 (5.8)   | 0.6  |
| Month 5                                          | 1,436 (2.7)   | 35,137 (2.9)   | -1.2 | 1,432 (2.7)   | 32,601 (2.7)   | 0.0  |
| Month 6                                          | 738 (1.4)     | 19,638 (1.6)   | -1.9 | 736 (1.4)     | 16,456 (1.4)   | 0.2  |
| Month 7                                          | 1,153 (2.2)   | 25,406 (2.1)   | 0.5  | 1,152 (2.2)   | 26,241 (2.2)   | 0.0  |
| Month 8                                          | 529 (1.0)     | 11,865 (1.0)   | 0.2  | 529 (1.0)     | 11,866 (1.0)   | 0.2  |
| Month 9                                          | 704 (1.3)     | 16,724 (1.4)   | -0.5 | 704 (1.3)     | 15,716 (1.3)   | 0.2  |
| No prenatal care                                 | 6,029 (11.5)  | 159,723 (13.3) | -5.7 | 6,027 (11.5)  | 135,311 (11.3) | 0.5  |
| Prenatal care index, N (%)                       |               |                |      |               |                |      |
| Adequate plus                                    | 3,834 (7.3)   | 79,047 (6.6)   | 2.7  | 3,830 (7.3)   | 89,091 (7.4)   | -1.1 |
| Adequate                                         | 3,942 (7.5)   | 82,173 (6.9)   | 2.5  | 3,933 (7.5)   | 93,289 (7.8)   | -0.6 |
| Intermediate                                     | 10,864 (20.6) | 232,457 (19.4) | 3.1  | 10,853 (20.6) | 249,104 (20.8) | -0.4 |
| Inadequate                                       | 33,993 (64.6) | 805,141 (67.2) | -5.4 | 33,969 (64.6) | 766,901 (64.0) | 1.3  |
| Start of prenatal vitamins, N (%)                |               |                |      |               |                |      |
| 3 <sup>rd</sup> month prior to LMP               | 1,228 (2.3)   | 25,891 (2.2)   | 1.2  | 2,537 (4.8)   | 59,696 (5.0)   | -0.3 |
| 2 <sup>nd</sup> month prior to LMP               | 1,594 (3.0)   | 33,916 (2.8)   | 1.2  | 1,593 (3.0)   | 37,499 (3.1)   | -0.6 |
| 1 <sup>st</sup> month prior to LMP               | 2,538 (4.8)   | 53,472 (4.5)   | 1.7  | 1,228 (2.3)   | 28,533 (2.4)   | -0.7 |
| Month 1                                          | 2,566 (4.9)   | 58,547 (4.9)   | 0    | 2,565 (4.9)   | 59,368 (5.0)   | -0.4 |
| Month 2                                          | 7,065 (13.4)  | 157,762 (13.2) | 0.8  | 7,056 (13.4)  | 160,699 (13.4) | 0.0  |
| Month 3                                          | 3,810 (7.2)   | 90,431 (7.5)   | -1.2 | 3,807 (7.2)   | 85,167 (7.1)   | 0.5  |
| Month 4                                          | 1,544 (2.9)   | 39,047 (3.3)   | -1.9 | 1,541 (2.9)   | 34,060 (2.8)   | 0.5  |
| Month 5                                          | 845 (1.6)     | 19,761 (1.6)   | -0.3 | 845 (1.6)     | 18,792 (1.6)   | 0.3  |
| Month 6                                          | 559 (1.1)     | 12,788 (1.1)   | -0.1 | 559 (1.1)     | 13,275 (1.1)   | -0.4 |
| Month 7                                          | 577 (1.1)     | 12,296 (1.0)   | 0.7  | 577 (1.1)     | 13,146 (1.1)   | 0.0  |
| Month 8                                          | 329 (0.6)     | 6,594 (0.6)    | 1    | 329 (0.6)     | 7,451 (0.6)    | 0.0  |
| Month 9                                          | 153 (0.3)     | 3,130 (0.3)    | 0.6  | 153 (0.3)     | 3,420 (0.3)    | 0.1  |
| No prenatal vitamins                             | 29,825 (56.7) | 685,183 (57.2) | -1   | 29,795 (56.7) | 677,277 (56.5) | 0.3  |
| Comorbidities, N (%)                             |               |                |      |               |                |      |
| Asthma                                           | 2,952 (5.6)   | 36,358 (3.0)   | 12.7 | 2,946 (5.6)   | 70,691 (5.9)   | -1.3 |
| Autoimmune disorder                              | 1,907 (3.6)   | 27,843 (2.3)   | 7.7  | 1,902 (3.6)   | 45,349 (3.8)   | -0.9 |
| Pregestational diabetes                          | 5,248 (10.0)  | 94,133 (7.9)   | 7.4  | 5,238 (10.0)  | 120,975 (10.1) | -0.4 |
| GBS infection                                    | 963 (1.8)     | 22,577 (1.9)   | -0.4 | 962 (1.8)     | 21,890 (1.8)   | 0.0  |
| Pregestational hypertension                      | 4,495 (8.5)   | 65,278 (5.4)   | 12.2 | 4,478 (8.5)   | 105,992 (8.8)  | -1.2 |
| Influenza                                        | 782 (1.5)     | 13,662 (1.1)   | 3    | 782 (1.5)     | 18,213 (1.5)   | -0.3 |
| Other STD infection                              | 445 (0.8)     | 10,050 (0.8)   | 0.1  | 445 (0.8)     | 10,739 (0.9)   | -0.5 |

|                                                  |               |                |       |               |                |      |
|--------------------------------------------------|---------------|----------------|-------|---------------|----------------|------|
| Overweight/obesity                               | 3,127 (5.9)   | 44,890 (3.7)   | 10.3  | 3,119 (5.9)   | 74,473 (6.2)   | -1.2 |
| Renal disease                                    | 133 (0.3)     | 2,649 (0.2)    | 0.7   | 133 (0.3)     | 3,238 (0.3)    | -0.3 |
| TORCH infection                                  | 364 (0.7)     | 1,1562 (1.0)   | -3    | 364 (0.7)     | 8,519 (0.7)    | -0.2 |
| Obstetric Comorbidity Index <sup>3</sup> , N (%) |               |                |       |               |                |      |
| 0                                                | 17,755 (33.7) | 526,672 (43.9) | -21.0 | 17,748 (33.8) | 393,524 (32.8) | 1.9  |
| 1                                                | 14,585 (27.7) | 316,929 (26.4) | 2.9   | 14,577 (27.7) | 334,752 (27.9) | -0.5 |
| 2                                                | 9,614 (18.3)  | 186,353 (15.5) | 7.3   | 9,605 (18.3)  | 220,851 (18.4) | -0.4 |
| 3+                                               | 10,679 (20.3) | 168,864 (14.1) | 16.5  | 10,655 (20.3) | 249,258 (20.8) | -1.3 |
| Other prescription medications, N (%)            |               |                |       |               |                |      |
| Anticonvulsants                                  | 2,878 (5.5)   | 9,325 (0.8)    | 27.2  | 2,856 (5.4)   | 62,719 (5.2)   | 0.9  |
| Antidiabetics                                    | 3,191 (6.1)   | 45,342 (3.8)   | 10.6  | 3,182 (6.1)   | 75,941 (6.3)   | -1.2 |
| Antihypertensives                                | 6,302 (12.0)  | 66,183 (5.5)   | 23.0  | 6,278 (11.9)  | 150,834 (12.6) | -2.0 |
| Antipsychotics                                   | 1,471 (2.8)   | 956 (0.1)      | 23.0  | 1,444 (2.7)   | 26,367 (2.2)   | 3.5  |
| Anxiolytics                                      | 1,225 (2.3)   | 1,618 (0.1)    | 20.0  | 1,210 (2.3)   | 26,506 (2.2)   | 0.6  |
| Barbiturates                                     | 3,391 (6.4)   | 23,486 (2.0)   | 22.5  | 3,381 (6.4)   | 82,619 (6.9)   | -1.9 |
| Benzodiazepines                                  | 9,220 (17.5)  | 33,382 (2.8)   | 50.3  | 9,176 (17.4)  | 209,366 (17.5) | -0.1 |
| Corticosteroids                                  | 15,971 (30.3) | 229,744 (19.2) | 26.1  | 15,942 (30.3) | 377,231 (31.5) | -2.5 |
| Insulin                                          | 1,608 (3.1)   | 21,273 (1.8)   | 8.4   | 1,607 (3.1)   | 38,289 (3.2)   | -0.8 |
| NSAIDs                                           | 8,041 (15.3)  | 88,470 (7.4)   | 25.1  | 8,023 (15.3)  | 194,659 (16.2) | -2.7 |
| Opioids                                          | 16,932 (32.2) | 199,561 (16.6) | 36.7  | 16,895 (32.1) | 407,047 (34.0) | -3.9 |
| Other hypnotics                                  | 7,936 (15.1)  | 38,339 (3.2)   | 42.1  | 7,898 (15.0)  | 186,349 (15.6) | -1.5 |
| OAD treatment                                    | 200 (0.4)     | 480 (0.0)      | 7.4   | 198 (0.4)     | 5,054 (0.4)    | -0.7 |
| Progestins                                       | 8,730 (16.6)  | 159,553 (13.3) | 9.2   | 8,722 (16.6)  | 206,951 (17.3) | -1.8 |
| Psychostimulants                                 | 1,660 (3.2)   | 6,951 (0.6)    | 19.1  | 1,657 (3.2)   | 39,479 (3.3)   | -0.8 |
| Known teratogens                                 | 477 (0.9)     | 5,437 (0.5)    | 5.5   | 476 (0.9)     | 10,674 (0.9)   | 0.2  |
| Suspected teratogens                             | 8,901 (16.9)  | 130,037 (10.8) | 17.6  | 8,884 (16.9)  | 212,397 (17.7) | -2.2 |
| Triptans                                         | 2,067 (3.9)   | 13,425 (1.1)   | 18    | 2,059 (3.9)   | 50,094 (4.2)   | -1.3 |
| Additional post-delivery variables <sup>4</sup>  |               |                |       |               |                |      |
| Well-child visits up to year 1                   | 8.6 (3.2)     | 8.8 (3.3)      | -5.9  |               |                |      |
| Well-child visits up to year 4                   | 11.0 (3.2)    | 11.4 (3.3)     | -11.9 |               |                |      |

<sup>1</sup>Other neurodevelopmental disorders include autism spectrum disorder, speech/language disorder, developmental coordination disorder, intellectual disability, and specific learning disorder.

<sup>2</sup>Other mental health disorders include delirium, dementia, tic disorder, somatoform spectrum disorder, eating disorder, psychotherapy, self-inflicted injury.

<sup>3</sup>As defined by Bateman et al. (2013): Development of a comorbidity index for use in obstetric patients.

<sup>4</sup>These variables were not included in the propensity score, therefore are not reported for the weighted results

eTable 15. Characteristics of the cohort for individuals exposed to antidepressants during early pregnancy and individuals unexposed to antidepressants throughout pregnancy, in MAX, crude and propensity score weighted results

|                                                 | Crude                  |                |              | Weighted               |                  |              |
|-------------------------------------------------|------------------------|----------------|--------------|------------------------|------------------|--------------|
|                                                 | Antidepressant exposed | Unexposed      | Std Diff (%) | Antidepressant exposed | Unexposed        | Std Diff (%) |
| Age, mean (SD)                                  | 26.2 (5.9)             | 24.3 (5.8)     | 33.2         | 26.2 (5.9)             | 26 (5.9)         | 3.1          |
| Age categories, N (%)                           |                        |                |              |                        |                  |              |
| ≤19 years                                       | 16,513 (12.8)          | 430,668 (23.5) | -28.1        | 16,171 (12.7)          | 234,896 (13.0)   | -0.9         |
| 20-24 years                                     | 38,169 (29.5)          | 625,359 (34.1) | -9.9         | 37,287 (29.4)          | 533,122 (29.6)   | -0.4         |
| 25-29 years                                     | 39,188 (30.3)          | 439,890 (24.0) | 14.2         | 38,562 (30.4)          | 548,660 (30.4)   | -0.1         |
| 30-34 years                                     | 22,837 (17.7)          | 219,651 (12.0) | 16.0         | 22,487 (17.7)          | 316,210 (17.5)   | 0.4          |
| 35-39 years                                     | 10,162 (7.9)           | 93,761 (5.1)   | 11.2         | 10,010 (7.9)           | 136,924 (7.6)    | 1.1          |
| ≥40 years                                       | 2,489 (1.9)            | 24,598 (1.3)   | 4.6          | 2,453 (1.9)            | 33,052 (1.8)     | 0.7          |
| Race/ethnicity <sup>1</sup> , N (%)             |                        |                |              |                        |                  |              |
| Asian or other Pacific Islander                 | 1,429 (1.1)            | 73,042 (4.0)   | -18.4        | 1,424 (1.1)            | 15,428 (0.9)     | 2.7          |
| Black or African American                       | 17,347 (13.4)          | 645,600 (35.2) | -52.5        | 17,026 (13.4)          | 220,517 (12.2)   | 3.5          |
| Hispanic or Latino                              | 8,122 (6.3)            | 279,317 (15.2) | -29.2        | 8,095 (6.4)            | 100,081 (5.6)    | 3.5          |
| Unknown or other                                | 8,451 (6.5)            | 155,220 (8.5)  | -7.3         | 8,428 (6.6)            | 114,628 (6.4)    | 1.1          |
| White                                           | 94,009 (72.7)          | 680,748 (37.1) | 76.5         | 91,997 (72.5)          | 1,352,212 (75.0) | -5.8         |
| Region, N (%)                                   |                        |                |              |                        |                  |              |
| Midwest                                         | 54,872 (42.4)          | 560,645 (30.6) | 24.8         | 54,764 (43.1)          | 778,648 (43.2)   | -0.1         |
| Northeast                                       | 20,234 (15.6)          | 321,625 (17.5) | -5.1         | 20,165 (15.9)          | 281,478 (15.6)   | 0.7          |
| South                                           | 35,902 (27.8)          | 533,036 (29.1) | -2.9         | 33,721 (26.6)          | 489,645 (27.2)   | -1.4         |
| West                                            | 18,350 (14.2)          | 418,621 (22.8) | -22.4        | 18,320 (14.4)          | 253,093 (14.0)   | 1.1          |
| Delivery year, N (%)                            |                        |                |              |                        |                  |              |
| 2000                                            | 79 (0.1)               | 1,640 (0.1)    | -1.0         | 79 (0.1)               | 1,084 (0.1)      | 0.1          |
| 2001                                            | 3,905 (3.0)            | 78,560 (4.3)   | -6.8         | 3,884 (3.1)            | 53,642 (3.0)     | 0.5          |
| 2002                                            | 5,530 (4.3)            | 90,037 (4.9)   | -3.0         | 5,510 (4.3)            | 76,112 (4.2)     | 0.6          |
| 2003                                            | 8,634 (6.7)            | 116,621 (6.4)  | 1.3          | 8,595 (6.8)            | 118,317 (6.6)    | 0.8          |
| 2004                                            | 11,135 (8.6)           | 139,324 (7.6)  | 3.7          | 11,087 (8.7)           | 150,403 (8.3)    | 1.4          |
| 2005                                            | 10,254 (7.9)           | 140,037 (7.6)  | 1.1          | 9,854 (7.8)            | 137,381 (7.6)    | 0.5          |
| 2006                                            | 9,666 (7.5)            | 140,842 (7.7)  | -0.8         | 8,637 (6.8)            | 122,208 (6.8)    | 0.1          |
| 2007                                            | 9,084 (7.0)            | 133,786 (7.3)  | -1.1         | 8,417 (6.6)            | 119,171 (6.6)    | 0.1          |
| 2008                                            | 8,427 (6.5)            | 132,419 (7.2)  | -2.8         | 8,404 (6.6)            | 122,714 (6.8)    | -0.8         |
| 2009                                            | 10,627 (8.2)           | 154,377 (8.4)  | -0.7         | 10,595 (8.3)           | 151,952 (8.4)    | -0.3         |
| 2010                                            | 12,323 (9.5)           | 164,190 (9.0)  | 2.0          | 12,295 (9.7)           | 174,885 (9.7)    | -0.1         |
| 2011                                            | 13,225 (10.2)          | 175,765 (9.6)  | 2.1          | 13,186 (10.4)          | 191,097 (10.6)   | -0.7         |
| 2012                                            | 13,164 (10.2)          | 179,839 (9.8)  | 1.2          | 13,146 (10.4)          | 191,782 (10.6)   | -0.9         |
| 2013                                            | 8,919 (6.9)            | 129,523 (7.1)  | -0.7         | 8,902 (7.0)            | 128,478 (7.1)    | -0.4         |
| 2014                                            | 4,386 (3.4)            | 56,967 (3.1)   | 1.6          | 4,379 (3.4)            | 63,638 (3.5)     | -0.4         |
| Indications and mental health conditions, N (%) |                        |                |              |                        |                  |              |
| ADHD                                            | 4,783 (3.7)            | 10,889 (0.6)   | 21.5         | 4,730 (3.7)            | 72,899 (4.0)     | -1.6         |
| Adjustment disorder                             | 2,490 (1.9)            | 13,412 (0.7)   | 10.4         | 2,460 (1.9)            | 36,465 (2.0)     | -0.6         |

|                                                |                |                  |        |                |                  |      |
|------------------------------------------------|----------------|------------------|--------|----------------|------------------|------|
| Anxiety                                        | 36,667 (28.3)  | 55,849 (3.0)     | 74.2   | 35,993 (28.3)  | 516,304 (28.6)   | -0.6 |
| Behavioral disorder                            | 2,472 (1.9)    | 13,908 (0.8)     | 10.1   | 2,439 (1.9)    | 36,189 (2.0)     | -0.6 |
| Bipolar disorder                               | 17,303 (13.4)  | 25,178 (1.4)     | 47.2   | 16,959 (13.4)  | 255,509 (14.2)   | -2.4 |
| Chronic fatigue                                | 13,284 (10.3)  | 68,411 (3.7)     | 25.8   | 13,002 (10.2)  | 191,700 (10.6)   | -1.3 |
| Depression, nonpsychotic                       | 24,795 (19.2)  | 24,564 (1.3)     | 61.5   | 24,342 (19.2)  | 308,879 (17.1)   | 5.3  |
| Depression, other                              | 48,748 (37.7)  | 62,940 (3.4)     | 93.6   | 47,982 (37.8)  | 654,165 (36.3)   | 3.1  |
| Depression, psychotic                          | 2,352 (1.8)    | 1,976 (0.1)      | 17.6   | 2,275 (1.8)    | 25,902 (1.4)     | 2.8  |
| Epilepsy/convulsion                            | 3,715 (2.9)    | 17,701 (1.0)     | 13.9   | 3,638 (2.9)    | 55,335 (3.1)     | -1.2 |
| Migraine/headache                              | 31,410 (24.3)  | 196,252 (10.7)   | 36.3   | 30,697 (24.2)  | 461,160 (25.6)   | -3.2 |
| Other developmental disorders <sup>2</sup>     | 912 (0.7)      | 5,194 (0.3)      | 6.0    | 901 (0.7)      | 12,549 (0.7)     | 0.2  |
| Other mental health disorders <sup>3</sup>     | 5,292 (4.1)    | 16,483 (0.9)     | 20.6   | 5,182 (4.1)    | 71,223 (4.0)     | 0.7  |
| Personality disorder                           | 2,693 (2.1)    | 3,085 (0.2)      | 18.2   | 2,660 (2.1)    | 34,900 (1.9)     | 1.1  |
| Psychosis                                      | 1,808 (1.4)    | 4,061 (0.2)      | 13.2   | 1,786 (1.4)    | 24,212 (1.3)     | 0.5  |
| Schizophrenia                                  | 1,719 (1.3)    | 2,726 (0.1)      | 13.8   | 1,697 (1.3)    | 24,019 (1.3)     | 0.0  |
| Sleep disorder                                 | 6,763 (5.2)    | 11,176 (0.6)     | 27.7   | 6,569 (5.2)    | 96,275 (5.3)     | -0.7 |
| Psychiatric visits, N (%)                      |                |                  |        |                |                  |      |
| 0 visits                                       | 107,075 (82.8) | 1,789,696 (97.6) | -51.4  | 105,155 (82.8) | 1,502,942 (83.4) | -1.5 |
| 1 visit                                        | 5,509 (4.3)    | 16,535 (0.9)     | 21.3   | 5,371 (4.2)    | 76,872 (4.3)     | -0.2 |
| 2-3 visits                                     | 6,001 (4.6)    | 11,254 (0.6)     | 25.4   | 5,834 (4.6)    | 81,897 (4.5)     | 0.2  |
| 4+ visits                                      | 10,773 (8.3)   | 16,442 (0.9)     | 36.0   | 10,610 (8.4)   | 141,154 (7.8)    | 1.9  |
| Mental health diagnoses, N (%)                 |                |                  |        |                |                  |      |
| 0 diagnoses                                    | 43,200 (33.4)  | 1,625,054 (88.6) | -137.3 | 42,367 (33.4)  | 578,331 (32.1)   | 2.7  |
| 1 diagnosis                                    | 28,846 (22.3)  | 126,831 (6.9)    | 44.6   | 28,295 (22.3)  | 449,170 (24.9)   | -6.2 |
| 2-3 diagnoses                                  | 36,579 (28.3)  | 65,301 (3.6)     | 71.8   | 35,941 (28.3)  | 520,067 (28.8)   | -1.2 |
| 4+ diagnoses                                   | 20,733 (16.0)  | 16,741 (0.9)     | 56.4   | 20,367 (16.0)  | 255,297 (14.2)   | 5.3  |
| Mental health ER visits, N (%)                 |                |                  |        |                |                  |      |
| 0 visits                                       | 117,251 (90.6) | 1,803,275 (98.3) | -34.2  | 115,086 (90.6) | 1,643,312 (91.2) | -1.8 |
| 1 visit                                        | 8,158 (6.3)    | 25,482 (1.4)     | 25.8   | 7,990 (6.3)    | 112,391 (6.2)    | 0.2  |
| 2-3 visits                                     | 3,414 (2.6)    | 4,819 (0.3)      | 20.0   | 3,361 (2.6)    | 41,942 (2.3)     | 2.1  |
| 4+ visits                                      | 535 (0.4)      | 351 (0.0)        | 8.5    | 533 (0.4)      | 5,219 (0.3)      | 2.2  |
| Mental health hospitalizations, N (%)          |                |                  |        |                |                  |      |
| 0 visits                                       | 120,452 (93.1) | 1,816,957 (99.1) | -31.1  | 118,405 (93.3) | 1,691,721 (93.8) | -2.4 |
| 1 visit                                        | 3,991 (3.1)    | 11,636 (0.6)     | 18.2   | 3,766 (3.0)    | 50,789 (2.8)     | 0.9  |
| 2-3 visits                                     | 3,276 (2.5)    | 4,248 (0.2)      | 19.8   | 3,198 (2.5)    | 40,909 (2.3)     | 1.6  |
| 4+ visits                                      | 1,639 (1.3)    | 1,086 (0.1)      | 14.9   | 1,601 (1.3)    | 19,447 (1.1)     | 1.7  |
| Other psychiatric medications, N (%)           |                |                  |        |                |                  |      |
| 0 drugs                                        | 92,019 (71.1)  | 1,790,601 (97.6) | -78.4  | 90,309 (71.1)  | 1,290,197 (71.6) | -1.0 |
| 1 drug                                         | 12,010 (9.3)   | 21,778 (1.2)     | 37.0   | 11,784 (9.3)   | 179,069 (9.9)    | -2.2 |
| 2-3 drugs                                      | 18,691 (14.4)  | 17,799 (1.0)     | 52.2   | 18,378 (14.5)  | 253,449 (14.1)   | 1.2  |
| 4+ drugs                                       | 6,638 (5.1)    | 3,749 (0.2)      | 30.9   | 6,499 (5.1)    | 80,151 (4.4)     | 3.2  |
| Outpatient visits (based on quartiles) , N (%) |                |                  |        |                |                  |      |
| Low                                            | 9,838 (7.6)    | 508,142 (27.7)   | -54.7  | 9,668 (7.6)    | 117,261 (6.5)    | 4.3  |
| Low to moderate                                | 19,623 (15.2)  | 509,272 (27.8)   | -31.1  | 19,198 (15.1)  | 257,501 (14.3)   | 2.4  |

|                                                  |                |                  |       |                |                  |      |
|--------------------------------------------------|----------------|------------------|-------|----------------|------------------|------|
| Moderate to high                                 | 24,354 (18.8)  | 380,976 (20.8)   | -4.9  | 23,841 (18.8)  | 346,595 (19.2)   | -1.1 |
| High                                             | 75,543 (58.4)  | 435,537 (23.7)   | 75.3  | 74,263 (58.5)  | 1,081,508 (60.0) | -3.1 |
| Hospitalizations, N (%)                          |                |                  |       |                |                  |      |
| 0 visits                                         | 111,170 (85.9) | 1,685,214 (91.9) | -19.0 | 110,057 (86.7) | 1,567,834 (87.0) | -0.8 |
| 1 visit                                          | 11,632 (9.0)   | 99,464 (5.4)     | 13.8  | 11,258 (8.9)   | 156,707 (8.7)    | 0.6  |
| 2-3 visits                                       | 4,135 (3.2)    | 32,966 (1.8)     | 9.0   | 3,686 (2.9)    | 50,020 (2.8)     | 0.8  |
| 4+ visits                                        | 2,421 (1.9)    | 16,283 (0.9)     | 8.4   | 1,969 (1.6)    | 28,303 (1.6)     | -0.2 |
| Lifestyle behaviors/environmental, N (%)         |                |                  |       |                |                  |      |
| Alcohol abuse                                    | 4,691 (3.6)    | 13,921 (0.8)     | 19.7  | 4,636 (3.7)    | 61,492 (3.4)     | 1.3  |
| Tobacco use                                      | 24,437 (18.9)  | 137,823 (7.5)    | 34.1  | 23,973 (18.9)  | 354,602 (19.7)   | -2.0 |
| Substance abuse                                  | 14,452 (11.2)  | 52,472 (2.9)     | 33.0  | 14,194 (11.2)  | 202,461 (11.2)   | -0.2 |
| Hyperemesis/nausea and vomiting in pregnancy     | 35,299 (27.3)  | 312,755 (17.1)   | 24.8  | 34,474 (27.2)  | 503,201 (27.9)   | -1.7 |
| Poor nutrition                                   | 3,391 (2.6)    | 24,001 (1.3)     | 9.5   | 3,352 (2.6)    | 49,091 (2.7)     | -0.5 |
| Start of prenatal care, gestational month, N (%) |                |                  |       |                |                  |      |
| Month 1                                          | 7,367 (5.7)    | 79,729 (4.3)     | 6.2   | 7,255 (5.7)    | 105,040 (5.8)    | -0.5 |
| Month 2                                          | 49,408 (38.2)  | 527,048 (28.7)   | 20.1  | 48,612 (38.3)  | 704,444 (39.1)   | -1.6 |
| Month 3                                          | 31,731 (24.5)  | 401,997 (21.9)   | 6.2   | 31,219 (24.6)  | 443,076 (24.6)   | 0.0  |
| Month 4                                          | 12,851 (9.9)   | 217,529 (11.9)   | -6.2  | 12,605 (9.9)   | 174,054 (9.7)    | 0.9  |
| Month 5                                          | 7,216 (5.6)    | 143,688 (7.8)    | -9.0  | 7,050 (5.6)    | 96,562 (5.4)     | 0.9  |
| Month 6                                          | 3,819 (3.0)    | 90,590 (4.9)     | -10.2 | 3,729 (2.9)    | 50,584 (2.8)     | 0.8  |
| Month 7                                          | 3,086 (2.4)    | 67,782 (3.7)     | -7.6  | 3,005 (2.4)    | 42,591 (2.4)     | 0.0  |
| Month 8                                          | 2,028 (1.6)    | 46,639 (2.5)     | -6.9  | 1,981 (1.6)    | 27,049 (1.5)     | 0.5  |
| Month 9                                          | 2,177 (1.7)    | 46,321 (2.5)     | -5.9  | 2,112 (1.7)    | 29,126 (1.6)     | 0.4  |
| No prenatal care                                 | 9,675 (7.5)    | 212,604 (11.6)   | -14.0 | 9,402 (7.4)    | 130,338 (7.2)    | 0.7  |
| Prenatal care index, N (%)                       |                |                  |       |                |                  |      |
| Adequate plus                                    | 18,250 (14.1)  | 235,059 (12.8)   | 3.8   | 32,721 (25.8)  | 465,569 (25.8)   | -0.1 |
| Adequate                                         | 32,947 (25.5)  | 413,909 (22.6)   | 6.8   | 18,034 (14.2)  | 254,357 (14.1)   | 0.3  |
| Intermediate                                     | 21,480 (16.6)  | 238,691 (13.0)   | 10.1  | 21,062 (16.6)  | 302,715 (16.8)   | -0.5 |
| Inadequate                                       | 56,681 (43.8)  | 946,268 (51.6)   | -15.6 | 55,153 (43.4)  | 780,224 (43.3)   | 0.3  |
| Start of prenatal vitamins, N (%)                |                |                  |       |                |                  |      |
| 3 <sup>rd</sup> month prior to LMP               | 3,207 (2.5)    | 31,059 (1.7)     | 5.5   | 3,132 (2.5)    | 44,879 (2.5)     | -0.1 |
| 2 <sup>nd</sup> month prior to LMP               | 1,843 (1.4)    | 18,821 (1.0)     | 3.6   | 1,805 (1.4)    | 25,737 (1.4)     | -0.1 |
| 1 <sup>st</sup> month prior to LMP               | 1,434 (1.1)    | 13,532 (0.7)     | 3.9   | 1,410 (1.1)    | 20,239 (1.1)     | -0.1 |
| Month 1                                          | 9,981 (7.7)    | 97,643 (5.3)     | 9.7   | 9,784 (7.7)    | 141,051 (7.8)    | -0.4 |
| Month 2                                          | 38,101 (29.5)  | 419,250 (22.9)   | 15.0  | 37,282 (29.4)  | 531,234 (29.5)   | -0.2 |
| Month 3                                          | 18,808 (14.5)  | 252,858 (13.8)   | 2.2   | 18,455 (14.5)  | 259,141 (14.4)   | 0.5  |
| Month 4                                          | 8,833 (6.8)    | 142,940 (7.8)    | -3.7  | 8,671 (6.8)    | 120,264 (6.7)    | 0.6  |
| Month 5                                          | 4,847 (3.7)    | 97,744 (5.3)     | -7.6  | 4,761 (3.7)    | 66,521 (3.7)     | 0.3  |
| Month 6                                          | 3,186 (2.5)    | 69,105 (3.8)     | -7.5  | 3,134 (2.5)    | 42,742 (2.4)     | 0.6  |
| Month 7                                          | 2,317 (1.8)    | 49,978 (2.7)     | -6.3  | 2,266 (1.8)    | 32,325 (1.8)     | -0.1 |
| Month 8                                          | 1,344 (1.0)    | 31,773 (1.7)     | -5.9  | 1,306 (1.0)    | 18,817 (1.0)     | -0.1 |
| Month 9                                          | 603 (0.5)      | 14,481 (0.8)     | -4.1  | 596 (0.5)      | 8,158 (0.5)      | 0.2  |
| No prenatal vitamins                             | 34,854 (26.9)  | 594,743 (32.4)   | -12.0 | 34,368 (27.1)  | 491,757 (27.3)   | -0.5 |

|                                                                                               |               |                  |       |               |                  |      |
|-----------------------------------------------------------------------------------------------|---------------|------------------|-------|---------------|------------------|------|
| Comorbidities, N (%)                                                                          |               |                  |       |               |                  |      |
| Asthma                                                                                        | 15,838 (12.2) | 120,900 (6.6)    | 19.4  | 15,551 (12.2) | 232,427 (12.9)   | -1.9 |
| Autoimmune disorder                                                                           | 2,909 (2.2)   | 17,036 (0.9)     | 10.6  | 2,855 (2.2)   | 41,681 (2.3)     | -0.4 |
| Pregestational diabetes                                                                       | 11,854 (9.2)  | 102,479 (5.6)    | 13.7  | 11,663 (9.2)  | 166,134 (9.2)    | -0.1 |
| GBS infection                                                                                 | 6,049 (4.7)   | 98,841 (5.4)     | -3.3  | 5,955 (4.7)   | 83,598 (4.6)     | 0.3  |
| Pregestational hypertension                                                                   | 9,810 (7.6)   | 81,845 (4.5)     | 13.2  | 9,604 (7.6)   | 141,557 (7.9)    | -1.1 |
| Influenza                                                                                     | 2,459 (1.9)   | 22,842 (1.2)     | 5.3   | 2,399 (1.9)   | 35,579 (2.0)     | -0.6 |
| Other STD infection                                                                           | 5,763 (4.5)   | 90,026 (4.9)     | -2.2  | 5,630 (4.4)   | 83,730 (4.6)     | -1.0 |
| Overweight/obesity                                                                            | 10,910 (8.4)  | 104,081 (5.7)    | 10.8  | 10,766 (8.5)  | 158,081 (8.8)    | -1.0 |
| Renal disease                                                                                 | 616 (0.5)     | 4,655 (0.3)      | 3.7   | 605 (0.5)     | 9,206 (0.5)      | -0.5 |
| TORCH infection                                                                               | 5,241 (4.1)   | 82,566 (4.5)     | -2.2  | 5,171 (4.1)   | 72,834 (4.0)     | 0.2  |
| Obstetric Comorbidity Index <sup>4</sup> , N (%)                                              |               |                  |       |               |                  |      |
| 0                                                                                             | 53,381 (41.3) | 1,027,424 (56.0) | -29.9 | 52,390 (41.3) | 732,016 (40.6)   | 1.3  |
| 1                                                                                             | 30,639 (23.7) | 411,137 (22.4)   | 3.0   | 30,063 (23.7) | 425,510 (23.6)   | 0.2  |
| 2                                                                                             | 21,361 (16.5) | 209,624 (11.4)   | 14.7  | 20,982 (16.5) | 305,207 (16.9)   | -1.1 |
| 3+                                                                                            | 23,977 (18.5) | 185,742 (10.1)   | 24.2  | 23,535 (18.5) | 340,133 (18.9)   | -0.8 |
| Other prescription medications, N (%)                                                         |               |                  |       |               |                  |      |
| Anticonvulsants                                                                               | 17,235 (13.3) | 26,298 (1.4)     | 46.7  | 16,881 (13.3) | 240,711 (13.4)   | -0.2 |
| Antidiabetics                                                                                 | 4,993 (3.9)   | 31,978 (1.7)     | 12.9  | 4,883 (3.8)   | 71,577 (4.0)     | -0.6 |
| Antihypertensives                                                                             | 17,978 (13.9) | 94,612 (5.2)     | 30.1  | 17,585 (13.8) | 259,121 (14.4)   | -1.5 |
| Antipsychotics                                                                                | 16,281 (12.6) | 10,544 (0.6)     | 49.9  | 15,950 (12.6) | 213,291 (11.8)   | 2.2  |
| Anxiolytics                                                                                   | 5,762 (4.5)   | 4,654 (0.3)      | 28.0  | 5,640 (4.4)   | 78,346 (4.3)     | 0.5  |
| Barbiturates                                                                                  | 8,995 (7.0)   | 37,279 (2.0)     | 23.9  | 8,730 (6.9)   | 134,119 (7.4)    | -2.2 |
| Benzodiazepines                                                                               | 30,559 (23.6) | 33,710 (1.8)     | 69.2  | 30,020 (23.6) | 419,329 (23.3)   | 0.9  |
| Corticosteroids                                                                               | 40,292 (31.1) | 323,243 (17.6)   | 31.9  | 39,475 (31.1) | 575,052 (31.9)   | -1.7 |
| Insulin                                                                                       | 4,915 (3.8)   | 33,743 (1.8)     | 11.9  | 4,840 (3.8)   | 69,994 (3.9)     | -0.4 |
| NSAIDs                                                                                        | 48,136 (37.2) | 407,602 (22.2)   | 33.2  | 47,105 (37.1) | 686,396 (38.1)   | -2.0 |
| Opioids                                                                                       | 72,537 (56.1) | 532,059 (29.0)   | 56.9  | 70,958 (55.9) | 1,051,385 (58.3) | -4.9 |
| Other hypnotics                                                                               | 28,979 (22.4) | 117,732 (6.4)    | 46.7  | 28,378 (22.4) | 396,606 (22.0)   | 0.8  |
| OAD treatment                                                                                 | 3,095 (2.4)   | 6,075 (0.3)      | 17.9  | 3,079 (2.4)   | 44,574 (2.5)     | -0.3 |
| Progestins                                                                                    | 10,180 (7.9)  | 88,632 (4.8)     | 12.5  | 9,931 (7.8)   | 146,588 (8.1)    | -1.1 |
| Psychostimulants                                                                              | 6,031 (4.7)   | 9,315 (0.5)      | 26.4  | 5,952 (4.7)   | 88,709 (4.9)     | -1.1 |
| Known teratogens                                                                              | 2,082 (1.6)   | 5,418 (0.3)      | 13.6  | 2,037 (1.6)   | 32,183 (1.8)     | -1.4 |
| Suspected teratogens                                                                          | 34,882 (27.0) | 310,428 (16.9)   | 24.4  | 34,096 (26.9) | 499,720 (27.7)   | -1.9 |
| Triptans                                                                                      | 6,383 (4.9)   | 15,586 (0.8)     | 24.6  | 6,217 (4.9)   | 95,716 (5.3)     | -1.9 |
| Proximity to metropolitan area, N (%)                                                         |               |                  |       |               |                  |      |
| Metropolitan                                                                                  | 99,680 (78.5) | 1,570,850 (87.0) | -22.6 | 99,643 (78.5) | 1,399,550 (77.6) | 2.0  |
| Non-metropolitan                                                                              | 23,259 (18.3) | 201,130 (11.1)   | 20.4  | 23,237 (18.3) | 343,771 (19.1)   | -2.0 |
| Rural                                                                                         | 4,093 (3.2)   | 34,555 (1.9)     | 8.3   | 4,090 (3.2)   | 59,544 (3.3)     | -0.5 |
| Percentage of Population with ≤ High School Diploma (Based on Quartiles) <sup>5</sup> , N (%) |               |                  |       |               |                  |      |
| Low                                                                                           | 33,219 (26.2) | 445,850 (24.7)   | 3.4   | 33,208 (26.2) | 472,437 (26.2)   | -0.1 |
| Low to moderate                                                                               | 26,812 (21.1) | 467,409 (25.9)   | -11.3 | 26,805 (21.1) | 373,649 (20.7)   | 0.9  |

|                                                             |               |                |       |               |                |      |
|-------------------------------------------------------------|---------------|----------------|-------|---------------|----------------|------|
| Moderate to high                                            | 28,916 (22.8) | 457,015 (25.3) | -6.0  | 28,906 (22.8) | 405,457 (22.5) | 0.7  |
| High                                                        | 38,080 (30.0) | 435,258 (24.1) | 13.3  | 38,051 (30.0) | 551,321 (30.6) | -1.3 |
| Poverty Rate (Based on Quartiles) <sup>5</sup> , N (%)      |               |                |       |               |                |      |
| Low                                                         | 41,286 (32.5) | 439,567 (24.3) | 18.2  | 41,268 (32.5) | 593,517 (32.9) | -0.9 |
| Low to moderate                                             | 28,956 (22.8) | 457,336 (25.3) | -5.9  | 28,941 (22.8) | 402,416 (22.3) | 1.1  |
| Moderate to high                                            | 34,732 (27.3) | 441,735 (24.5) | 6.6   | 34,721 (27.3) | 501,822 (27.8) | -1.1 |
| High                                                        | 22,047 (17.4) | 466,863 (25.9) | -20.8 | 22,040 (17.4) | 305,110 (16.9) | 1.2  |
| Unemployment Rate (Based on Quartiles) <sup>5</sup> , N (%) |               |                |       |               |                |      |
| Low                                                         | 40,914 (32.2) | 437,740 (24.2) | 17.8  | 40,895 (32.2) | 593,714 (32.9) | -1.5 |
| Low to moderate                                             | 33,222 (26.2) | 436,584 (24.2) | 4.6   | 33,209 (26.2) | 472,401 (26.2) | -0.1 |
| Moderate to high                                            | 26,177 (20.6) | 479,454 (26.6) | -14.0 | 26,168 (20.6) | 361,287 (20.0) | 1.4  |
| High                                                        | 26,711 (21.0) | 451,746 (25.0) | -9.5  | 26,698 (21.0) | 375,462 (20.8) | 0.5  |
| Additional post-delivery variables <sup>6</sup>             |               |                |       |               |                |      |
| Well-child visits up to year 1                              | 7.1 (4.1)     | 6.8 (4.2)      | 7.5   |               |                |      |
| Well-child visits up to year 4                              | 9.3 (4.5)     | 9.0 (4.6)      | 7.0   |               |                |      |

<sup>1</sup>Race/ethnicity was determined based on information submitted to the Centers for Medicare & Medicaid Services by individual states, which was based on information that had been collected and coded from Medicaid applications.

<sup>2</sup>Other neurodevelopmental disorders include autism spectrum disorder, speech/language disorder, developmental coordination disorder, intellectual disability, and specific learning disorder.

<sup>3</sup>Other mental health disorders include delirium, dementia, tic disorder, somatoform spectrum disorder, eating disorder, psychotherapy, self-inflicted injury.

<sup>4</sup>As defined by Bateman et al. (2013): Development of a comorbidity index for use in obstetric patients.<sup>1</sup>

<sup>5</sup>County-level SES-measures were assessed after linkage of zip codes (only available in MAX) with corresponding FIPS county codes using crosswalk files provided by the US Department of Housing and Urban Development; these FIPS codes were then used to merge the MAX data with data provided by the US Department of Agriculture which include county-level information on various SES-measures. Metropolitan area is defined as counties in metropolitan areas or counties with urban population of 20,000 or more, adjacent to a metropolitan area; urban area is defined as counties with urban population of 20,000 or more, not adjacent to a metropolitan area, or counties with populations of 2,500 to 19,999 residents; rural area is defined as counties with a population of less than 2,500. Categories of unemployment rate, poverty rate and rate of educational attainment reflect year-specific quartiles.

<sup>6</sup>These variables were not included in the propensity score, therefore are not reported for the weighted results



eTable 16. Characteristics of the cohort for individuals exposed to antidepressants during early pregnancy and individuals unexposed to antidepressants throughout pregnancy, in MarketScan, crude and propensity score weighted results

|                                                 | Crude                  |                |              | Weighted               |                |              |
|-------------------------------------------------|------------------------|----------------|--------------|------------------------|----------------|--------------|
|                                                 | Antidepressant exposed | Unexposed      | Std Diff (%) | Antidepressant exposed | Unexposed      | Std Diff (%) |
| Age, mean (SD)                                  | 32.7 (4.6)             | 31.9 (4.6)     | 16.5         | 32.7 (4.6)             | 32.7 (4.7)     | -0.4         |
| Age categories, N (%)                           |                        |                |              |                        |                |              |
| ≤19 years                                       | 159 (0.2)              | 3,166 (0.3)    | -0.7         | 159 (0.2)              | 2,971 (0.2)    | -0.4         |
| 20-24 years                                     | 2,170 (3.1)            | 52,584 (4.4)   | -6.6         | 2,168 (3.1)            | 37,374 (3.1)   | 0.1          |
| 25-29 years                                     | 15,304 (22.1)          | 316,956 (26.4) | -10.1        | 15,289 (22.1)          | 258,196 (21.5) | 1.4          |
| 30-34 years                                     | 27,552 (39.9)          | 486,489 (40.6) | -1.5         | 27,530 (39.9)          | 476,718 (39.8) | 0.2          |
| 35-39 years                                     | 18,845 (27.3)          | 272,351 (22.7) | 10.5         | 18,814 (27.2)          | 331,250 (27.6) | -0.9         |
| ≥40 years                                       | 5,108 (7.4)            | 67,272 (5.6)   | 7.2          | 5,099 (7.4)            | 92,134 (7.7)   | -1.1         |
| Region, N (%)                                   |                        |                |              |                        |                |              |
| Midwest                                         | 20,153 (29.1)          | 305,958 (25.5) | 8.2          | 20,129 (29.1)          | 343,938 (28.7) | 1.0          |
| Northeast                                       | 8,908 (12.9)           | 191,501 (16.0) | -8.8         | 8,903 (12.9)           | 151,639 (12.7) | 0.7          |
| South                                           | 28,948 (41.9)          | 470,808 (39.3) | 5.3          | 28,911 (41.9)          | 510,083 (42.6) | -1.4         |
| West                                            | 10,217 (14.8)          | 216,743 (18.1) | -8.9         | 10,205 (14.8)          | 177,524 (14.8) | -0.1         |
| Delivery year, N (%)                            |                        |                |              |                        |                |              |
| 2003                                            | 62 (0.1)               | 946 (0.1)      | 0.4          | 62 (0.1)               | 1,038 (0.1)    | 0.1          |
| 2004                                            | 2,788 (4.0)            | 49,945 (4.2)   | -0.7         | 2,788 (4.0)            | 49,125 (4.1)   | -0.3         |
| 2005                                            | 3,883 (5.6)            | 64,374 (5.4)   | 1.1          | 3,878 (5.6)            | 68,041 (5.7)   | -0.3         |
| 2006                                            | 4,058 (5.9)            | 65,869 (5.5)   | 1.6          | 4,056 (5.9)            | 71,636 (6.0)   | -0.4         |
| 2007                                            | 4,822 (7.0)            | 80,740 (6.7)   | 1.0          | 4,820 (7.0)            | 83,596 (7.0)   | 0.0          |
| 2008                                            | 5,636 (8.2)            | 92,998 (7.8)   | 1.5          | 5,628 (8.1)            | 97,384 (8.1)   | 0.1          |
| 2009                                            | 7,875 (11.4)           | 131,938 (11.0) | 1.2          | 7,867 (11.4)           | 135,383 (11.3) | 0.3          |
| 2010                                            | 7,919 (11.5)           | 130,341 (10.9) | 1.9          | 7,911 (11.5)           | 136,186 (11.4) | 0.3          |
| 2011                                            | 8,785 (12.7)           | 144,347 (12.0) | 2.0          | 8,773 (12.7)           | 153,150 (12.8) | -0.2         |
| 2012                                            | 8,095 (11.7)           | 149,693 (12.5) | -2.4         | 8,083 (11.7)           | 140,676 (11.7) | -0.1         |
| 2013                                            | 6,418 (9.3)            | 121,388 (10.1) | -2.9         | 6,406 (9.3)            | 109,973 (9.2)  | 0.4          |
| 2014                                            | 6,159 (8.9)            | 116,079 (9.7)  | -2.7         | 6,154 (8.9)            | 107,531 (9.0)  | -0.2         |
| 2015                                            | 2,638 (3.8)            | 50,160 (4.2)   | -1.9         | 2,633 (3.8)            | 44,923 (3.7)   | 0.3          |
| Indications and mental health conditions, N (%) |                        |                |              |                        |                |              |
| ADHD                                            | 1,470 (2.1)            | 4,351 (0.4)    | 16.0         | 1,469 (2.1)            | 26,696 (2.2)   | -0.7         |
| Adjustment disorder                             | 774 (1.1)              | 3,449 (0.3)    | 10.0         | 772 (1.1)              | 13,960 (1.2)   | -0.4         |
| Anxiety                                         | 16,264 (23.5)          | 27,316 (2.3)   | 66.8         | 16,192 (23.4)          | 294,958 (24.6) | -2.7         |
| Behavioral disorder                             | 117 (0.2)              | 189 (0.0)      | 5.1          | 115 (0.2)              | 1,945 (0.2)    | 0.1          |
| Bipolar disorder                                | 2,702 (3.9)            | 2,756 (0.2)    | 26.1         | 2,674 (3.9)            | 48,863 (4.1)   | -1.0         |
| Chronic fatigue                                 | 7,869 (11.4)           | 57,829 (4.8)   | 24.2         | 7,842 (11.4)           | 148,503 (12.4) | -3.2         |
| Depression, nonpsychotic                        | 9,736 (14.1)           | 7,021 (0.6)    | 53.6         | 9,662 (14.0)           | 144,724 (12.1) | 5.7          |
| Depression, other                               | 16,942 (24.5)          | 26,045 (2.2)   | 69.5         | 16,869 (24.4)          | 282,229 (23.5) | 2.1          |
| Depression, psychotic                           | 164 (0.2)              | 82 (0.0)       | 6.6          | 159 (0.2)              | 2,324 (0.2)    | 0.8          |
| Epilepsy/convulsion                             | 607 (0.9)              | 4,936 (0.4)    | 5.8          | 605 (0.9)              | 11,141 (0.9)   | -0.6         |

|                                                |               |                  |        |               |                  |      |
|------------------------------------------------|---------------|------------------|--------|---------------|------------------|------|
| Migraine/headache                              | 9,890 (14.3)  | 72,814 (6.1)     | 27.5   | 9,855 (14.3)  | 185,752 (15.5)   | -3.4 |
| Other developmental disorders <sup>1</sup>     | 43 (0.1)      | 219 (0.0)        | 2.2    | 43 (0.1)      | 752 (0.1)        | 0.0  |
| Other mental health disorders <sup>2</sup>     | 1,495 (2.2)   | 6,402 (0.5)      | 14.2   | 1,493 (2.2)   | 27,783 (2.3)     | -1.1 |
| Personality disorder                           | 259 (0.4)     | 260 (0.0)        | 7.9    | 250 (0.4)     | 4,686 (0.4)      | -0.5 |
| Psychosis                                      | 187 (0.3)     | 476 (0.0)        | 5.9    | 184 (0.3)     | 3,364 (0.3)      | -0.3 |
| Schizophrenia                                  | 63 (0.1)      | 93 (0.0)         | 3.8    | 63 (0.1)      | 940 (0.1)        | 0.4  |
| Sleep disorder                                 | 3,394 (4.9)   | 8,935 (0.7)      | 25.3   | 3,369 (4.9)   | 64,100 (5.3)     | -2.1 |
| Psychiatric visits, N (%)                      |               |                  |        |               |                  |      |
| 0 visits                                       | 55,639 (80.5) | 1,167,770 (97.4) | -56.1  | 55,596 (80.5) | 961,166 (80.2)   | 0.8  |
| 1 visit                                        | 2,415 (3.5)   | 5,769 (0.5)      | 21.7   | 2,407 (3.5)   | 42,678 (3.6)     | -0.4 |
| 2-3 visits                                     | 3,267 (4.7)   | 7,052 (0.6)      | 25.9   | 3,260 (4.7)   | 56,256 (4.7)     | 0.1  |
| 4+ visits                                      | 7,817 (11.3)  | 18,227 (1.5)     | 40.8   | 7,796 (11.3)  | 138,542 (11.6)   | -0.8 |
| Mental health diagnoses, N (%)                 |               |                  |        |               |                  |      |
| 0 diagnoses                                    | 36,672 (53.0) | 1,137,078 (94.8) | -108.3 | 36,670 (53.1) | 628,430 (52.4)   | 1.3  |
| 1 diagnosis                                    | 14,347 (20.8) | 37,534 (3.1)     | 56.5   | 14,344 (20.8) | 276,870 (23.1)   | -5.6 |
| 2-3 diagnoses                                  | 13,944 (20.2) | 21,930 (1.8)     | 61.3   | 13,922 (20.2) | 234,599 (19.6)   | 1.5  |
| 4+ diagnoses                                   | 4,175 (6.0)   | 2,276 (0.2)      | 34.2   | 4,123 (6.0)   | 58,744 (4.9)     | 4.7  |
| Mental health ER visits, N (%)                 |               |                  |        |               |                  |      |
| 0 visits                                       | 66,852 (96.7) | 1,194,008 (99.6) | -21.7  | 66,785 (96.7) | 1,160,991 (96.9) | -0.9 |
| 1 visit                                        | 1,582 (2.3)   | 4,134 (0.3)      | 17.1   | 1,575 (2.3)   | 26,993 (2.3)     | 0.2  |
| 2-3 visits                                     | 549 (0.8)     | 592 (0.0)        | 11.5   | 546 (0.8)     | 8,447 (0.7)      | 1.0  |
| 4+ visits                                      | 155 (0.2)     | 84 (0.0)         | 6.4    | 153 (0.2)     | 2,212 (0.2)      | 0.8  |
| Mental health hospitalizations, N (%)          |               |                  |        |               |                  |      |
| 0 visits                                       | 67,917 (98.2) | 1,197,533 (99.9) | -17.3  | 67,853 (98.3) | 1,180,359 (98.5) | -1.7 |
| 1 visit                                        | 564 (0.8)     | 787 (0.1)        | 11.3   | 558 (0.8)     | 9,028 (0.8)      | 0.6  |
| 2-3 visits                                     | 479 (0.7)     | 418 (0.0)        | 10.9   | 474 (0.7)     | 6,771 (0.6)      | 1.5  |
| 4+ visits                                      | 178 (0.3)     | 80 (0.0)         | 6.9    | 174 (0.3)     | 2,484 (0.2)      | 0.9  |
| Other psychiatric medications, N (%)           |               |                  |        |               |                  |      |
| 0 drugs                                        | 59,203 (85.6) | 1,179,946 (98.4) | -48.6  | 59,195 (85.7) | 1,030,701 (86.0) | -0.8 |
| 1 drug                                         | 3,931 (5.7)   | 9,403 (0.8)      | 28.0   | 3,916 (5.7)   | 69,871 (5.8)     | -0.7 |
| 2-3 drugs                                      | 5,031 (7.3)   | 8,688 (0.7)      | 33.9   | 4,991 (7.2)   | 84,233 (7.0)     | 0.8  |
| 4+ drugs                                       | 973 (1.4)     | 781 (0.1)        | 15.8   | 957 (1.4)     | 13,838 (1.2)     | 2.1  |
| Outpatient visits (based on quartiles) , N (%) |               |                  |        |               |                  |      |
| Low                                            | 7,896 (11.4)  | 310,792 (25.9)   | -37.9  | 7,895 (11.4)  | 122,342 (10.2)   | 3.9  |
| Low to moderate                                | 11,596 (16.8) | 293,089 (24.4)   | -19.1  | 11,595 (16.8) | 193,500 (16.1)   | 1.7  |
| Moderate to high                               | 21,131 (30.6) | 338,871 (28.3)   | 5.0    | 21,117 (30.6) | 369,347 (30.8)   | -0.5 |
| High                                           | 28,515 (41.2) | 256,066 (21.4)   | 43.9   | 28,452 (41.2) | 513,453 (42.8)   | -3.3 |
| Hospitalizations, N (%)                        |               |                  |        |               |                  |      |
| 0 visits                                       | 65,839 (95.2) | 1,171,261 (97.7) | -13.4  | 65,778 (95.2) | 1,141,127 (95.2) | 0.2  |
| 1 visit                                        | 2,206 (3.2)   | 19,832 (1.7)     | 10.0   | 2,199 (3.2)   | 38,946 (3.2)     | -0.4 |
| 2-3 visits                                     | 705 (1.0)     | 5,401 (0.5)      | 6.7    | 699 (1.0)     | 12,171 (1.0)     | 0.0  |
| 4+ visits                                      | 388 (0.6)     | 2,324 (0.2)      | 6.0    | 383 (0.6)     | 6,399 (0.5)      | 0.3  |
| Lifestyle behaviors/environmental, N (%)       |               |                  |        |               |                  |      |

|                                                  |               |                |      |               |                |      |
|--------------------------------------------------|---------------|----------------|------|---------------|----------------|------|
| Alcohol abuse                                    | 415 (0.6)     | 806 (0.1)      | 9.3  | 411 (0.6)     | 6,275 (0.5)    | 1.0  |
| Tobacco use                                      | 2,217 (3.2)   | 12,022 (1.0)   | 15.4 | 2,212 (3.2)   | 41,391 (3.5)   | -1.4 |
| Substance abuse                                  | 757 (1.1)     | 1,728 (0.1)    | 12.1 | 755 (1.1)     | 12,881 (1.1)   | 0.2  |
| Hyperemesis/nausea and vomiting in pregnancy     | 9,837 (14.2)  | 91,317 (7.6)   | 21.3 | 9,804 (14.2)  | 177,871 (14.8) | -1.8 |
| Poor nutrition                                   | 2,130 (3.1)   | 21,543 (1.8)   | 8.3  | 2,121 (3.1)   | 38,731 (3.2)   | -0.9 |
| Start of prenatal care, gestational month, N (%) |               |                |      |               |                |      |
| Month 1                                          | 4,139 (6.0)   | 78,597 (6.6)   | -2.4 | 4,137 (6.0)   | 75,085 (6.3)   | -1.1 |
| Month 2                                          | 29,255 (42.3) | 486,566 (40.6) | 3.5  | 29,224 (42.3) | 511,854 (42.7) | -0.8 |
| Month 3                                          | 17,519 (25.3) | 291,038 (24.3) | 2.5  | 17,494 (25.3) | 300,972 (25.1) | 0.5  |
| Month 4                                          | 4,158 (6.0)   | 74,124 (6.2)   | -0.7 | 4,155 (6.0)   | 69,827 (5.8)   | 0.8  |
| Month 5                                          | 1,959 (2.8)   | 35,137 (2.9)   | -0.6 | 1,952 (2.8)   | 34,024 (2.8)   | -0.1 |
| Month 6                                          | 960 (1.4)     | 19,638 (1.6)   | -2.0 | 958 (1.4)     | 16,417 (1.4)   | 0.2  |
| Month 7                                          | 1,454 (2.1)   | 25,406 (2.1)   | -0.1 | 1,452 (2.1)   | 24,689 (2.1)   | 0.3  |
| Month 8                                          | 706 (1.0)     | 11,865 (1.0)   | 0.3  | 706 (1.0)     | 12,098 (1.0)   | 0.1  |
| Month 9                                          | 948 (1.4)     | 16,724 (1.4)   | -0.2 | 948 (1.4)     | 16,122 (1.3)   | 0.2  |
| No prenatal care                                 | 8,040 (11.6)  | 159,723 (13.3) | -5.1 | 8,033 (11.6)  | 137,552 (11.5) | 0.5  |
| Prenatal care index, N (%)                       |               |                |      |               |                |      |
| Adequate plus                                    | 5,178 (7.5)   | 82,173 (6.9)   | 2.5  | 5,242 (7.6)   | 93,437 (7.8)   | -0.8 |
| Adequate                                         | 5,253 (7.6)   | 79,047 (6.6)   | 3.9  | 5,167 (7.5)   | 93,554 (7.8)   | -1.2 |
| Intermediate                                     | 14,345 (20.7) | 232,457 (19.4) | 3.4  | 14,328 (20.7) | 250,477 (20.9) | -0.4 |
| Inadequate                                       | 44,362 (64.2) | 805,141 (67.2) | -6.3 | 44,322 (64.2) | 761,174 (63.5) | 1.4  |
| Start of prenatal vitamins, N (%)                |               |                |      |               |                |      |
| 3 <sup>rd</sup> month prior to LMP               | 3,092 (4.5)   | 53,472 (4.5)   | 0.1  | 3,092 (4.5)   | 56,085 (4.7)   | -1.0 |
| 2 <sup>nd</sup> month prior to LMP               | 1,875 (2.7)   | 33,916 (2.8)   | -0.7 | 1,874 (2.7)   | 33,292 (2.8)   | -0.4 |
| 1 <sup>st</sup> month prior to LMP               | 1,413 (2.0)   | 25,891 (2.2)   | -0.8 | 1,412 (2.0)   | 25,334 (2.1)   | -0.5 |
| Month 1                                          | 3,442 (5.0)   | 58,547 (4.9)   | 0.4  | 3,440 (5.0)   | 60,896 (5.1)   | -0.5 |
| Month 2                                          | 10,320 (14.9) | 157,762 (13.2) | 5.1  | 10,304 (14.9) | 179,582 (15)   | -0.2 |
| Month 3                                          | 5,540 (8.0)   | 90,431 (7.5)   | 1.8  | 5,532 (8.0)   | 95,617 (8.0)   | 0.1  |
| Month 4                                          | 2,184 (3.2)   | 39,047 (3.3)   | -0.6 | 2,182 (3.2)   | 37,300 (3.1)   | 0.3  |
| Month 5                                          | 1,115 (1.6)   | 19,761 (1.6)   | -0.3 | 1,115 (1.6)   | 18,487 (1.5)   | 0.6  |
| Month 6                                          | 711 (1.0)     | 12,788 (1.1)   | -0.4 | 711 (1.0)     | 12,731 (1.1)   | -0.3 |
| Month 7                                          | 718 (1.0)     | 12,296 (1.0)   | 0.1  | 718 (1.0)     | 12,191 (1.0)   | 0.2  |
| Month 8                                          | 402 (0.6)     | 6,594 (0.6)    | 0.4  | 402 (0.6)     | 6,954 (0.6)    | 0.0  |
| Month 9                                          | 168 (0.2)     | 3,130 (0.3)    | -0.4 | 168 (0.2)     | 3,023 (0.3)    | -0.2 |
| No prenatal vitamins                             | 38,158 (55.2) | 685,183 (57.2) | -4.0 | 38,109 (55.2) | 657,150 (54.8) | 0.7  |
| Comorbidities, N (%)                             |               |                |      |               |                |      |
| Asthma                                           | 3,742 (5.4)   | 36,358 (3.0)   | 11.9 | 3,725 (5.4)   | 69,530 (5.8)   | -1.8 |
| Autoimmune disorder                              | 2,536 (3.7)   | 27,843 (2.3)   | 7.9  | 2,530 (3.7)   | 46,640 (3.9)   | -1.2 |
| Pregestational diabetes                          | 7,004 (10.1)  | 94,133 (7.9)   | 8.0  | 6,986 (10.1)  | 123,778 (10.3) | -0.7 |
| GBS infection                                    | 1,193 (1.7)   | 22,577 (1.9)   | -1.2 | 1,192 (1.7)   | 20,732 (1.7)   | 0.0  |
| Pregestational hypertension                      | 6,185 (8.9)   | 65,278 (5.4)   | 13.6 | 6,162 (8.9)   | 112,563 (9.4)  | -1.6 |
| Influenza                                        | 1,091 (1.6)   | 13,662 (1.1)   | 3.8  | 1,091 (1.6)   | 19,298 (1.6)   | -0.2 |
| Other STD infection                              | 633 (0.9)     | 10,050 (0.8)   | 0.8  | 633 (0.9)     | 11,307 (0.9)   | -0.3 |

|                                                  |               |                |       |               |                |      |
|--------------------------------------------------|---------------|----------------|-------|---------------|----------------|------|
| Overweight/obesity                               | 4,270 (6.2)   | 44,890 (3.7)   | 11.2  | 4,252 (6.2)   | 77,508 (6.5)   | -1.3 |
| Renal disease                                    | 195 (0.3)     | 2,649 (0.2)    | 1.2   | 195 (0.3)     | 3,750 (0.3)    | -0.6 |
| TORCH infection                                  | 541 (0.8)     | 11,562 (1.0)   | -2.0  | 541 (0.8)     | 9,634 (0.8)    | -0.2 |
| Obstetric Comorbidity Index <sup>3</sup> , N (%) |               |                |       |               |                |      |
| 0                                                | 23,429 (33.9) | 526,672 (43.9) | -20.7 | 23,422 (33.9) | 392,095 (32.7) | 2.6  |
| 1                                                | 18,838 (27.2) | 316,929 (26.4) | 1.8   | 18,825 (27.3) | 328,935 (27.4) | -0.4 |
| 2                                                | 12,554 (18.2) | 186,353 (15.5) | 7.0   | 12,532 (18.1) | 221,278 (18.5) | -0.8 |
| 3+                                               | 14,317 (20.7) | 168,864 (14.1) | 17.5  | 14,280 (20.7) | 256,333 (21.4) | -1.7 |
| Other prescription medications, N (%)            |               |                |       |               |                |      |
| Anticonvulsants                                  | 4,163 (6.0)   | 9,325 (0.8)    | 29.2  | 4,131 (6.0)   | 70,866 (5.9)   | 0.3  |
| Antidiabetics                                    | 4,292 (6.2)   | 45,342 (3.8)   | 11.2  | 4,278 (6.2)   | 77,777 (6.5)   | -1.2 |
| Antihypertensives                                | 8,721 (12.6)  | 66,183 (5.5)   | 24.9  | 8,684 (12.6)  | 160,939 (13.4) | -2.5 |
| Antipsychotics                                   | 1,909 (2.8)   | 956 (0.1)      | 22.8  | 1,873 (2.7)   | 26,316 (2.2)   | 3.3  |
| Anxiolytics                                      | 1,676 (2.4)   | 1,618 (0.1)    | 20.5  | 1,645 (2.4)   | 29,381 (2.5)   | -0.5 |
| Barbiturates                                     | 4,395 (6.4)   | 23,486 (2.0)   | 22.2  | 4,372 (6.3)   | 81,970 (6.8)   | -2.0 |
| Benzodiazepines                                  | 12,951 (18.7) | 33,382 (2.8)   | 53.3  | 12,880 (18.7) | 227,024 (18.9) | -0.7 |
| Corticosteroids                                  | 21,076 (30.5) | 229,744 (19.2) | 26.4  | 21,029 (30.5) | 380,502 (31.7) | -2.8 |
| Insulin                                          | 2,133 (3.1)   | 21,273 (1.8)   | 8.5   | 2,131 (3.1)   | 38,948 (3.2)   | -0.9 |
| NSAIDs                                           | 10,834 (15.7) | 88,470 (7.4)   | 26.2  | 10,794 (15.6) | 200,291 (16.7) | -2.9 |
| Opioids                                          | 22,585 (32.7) | 199,561 (16.6) | 37.8  | 22,523 (32.6) | 413,495 (34.5) | -4.0 |
| Other hypnotics                                  | 9,993 (14.5)  | 38,339 (3.2)   | 40.5  | 9,934 (14.4)  | 178,964 (14.9) | -1.5 |
| OAD treatment                                    | 285 (0.4)     | 480 (0.0)      | 7.8   | 282 (0.4)     | 5,395 (0.5)    | -0.6 |
| Progestins                                       | 11,255 (16.3) | 159,553 (13.3) | 8.4   | 11,239 (16.3) | 203,814 (17.0) | -2.0 |
| Psychostimulants                                 | 2,420 (3.5)   | 6,951 (0.6)    | 20.8  | 2,416 (3.5)   | 44,692 (3.7)   | -1.2 |
| Known teratogens                                 | 620 (0.9)     | 5,437 (0.5)    | 5.4   | 616 (0.9)     | 11,054 (0.9)   | -0.3 |
| Suspected teratogens                             | 12,005 (17.4) | 130,037 (10.8) | 18.8  | 11,974 (17.3) | 219,702 (18.3) | -2.6 |
| Triptans                                         | 2,994 (4.3)   | 13,425 (1.1)   | 19.8  | 2,980 (4.3)   | 56,638 (4.7)   | -2.0 |
| Additional post-delivery variables <sup>4</sup>  |               |                |       |               |                |      |
| Well-child visits up to year 1                   | 8.6 (3.2)     | 8.8 (3.3)      | -6.9  | -             | -              | -    |
| Well-child visits up to year 4                   | 11.0 (3.2)    | 11.4 (3.3)     | -13.0 | -             | -              | -    |

<sup>1</sup>Other neurodevelopmental disorders include autism spectrum disorder, speech/language disorder, developmental coordination disorder, intellectual disability, and specific learning disorder.

<sup>2</sup>Other mental health disorders include delirium, dementia, tic disorder, somatoform spectrum disorder, eating disorder, psychotherapy, self-inflicted injury.

<sup>3</sup>As defined by Bateman et al. (2013): Development of a comorbidity index for use in obstetric patients.

<sup>4</sup>These variables were not included in the propensity score, therefore are not reported for the weighted results

eTable 17. Sibling analysis for antidepressant use during late pregnancy and NDDs stratified by exposure status of first sibling, to investigate carry-over effects

| Outcome                        | Crude HR (95% CI)                               |                              |                                |
|--------------------------------|-------------------------------------------------|------------------------------|--------------------------------|
|                                | First 2 siblings from each multi-sibling family | First sibling exposed to ADs | First sibling unexposed to ADs |
| ASD                            | 1.03 (0.74, 1.43)                               | 1.23 (0.70, 2.15)            | 0.94 (0.62, 1.41)              |
| ADHD                           | 0.93 (0.81, 1.07)                               | 1.24 (0.96, 1.60)            | 0.81 (0.68, 0.97)              |
| Specific learning disorders    | 1.11 (0.66, 1.85)                               | 1.00 (0.40, 2.52)            | 1.16 (0.63, 2.14)              |
| Developmental speech/ language | 1.14 (0.99, 1.31)                               | 1.13 (0.89, 1.44)            | 1.14 (0.97, 1.35)              |
| Developmental coordination     | 1.07 (0.75, 1.52)                               | 1.00 (0.51, 1.96)            | 1.10 (0.72, 1.66)              |
| Intellectual disability        | 0.82 (0.44, 1.53)                               | 0.83 (0.25, 2.73)            | 0.81 (0.39, 1.69)              |
| Behavioral disorder            | 0.98 (0.83, 1.16)                               | 1.19 (0.88, 1.61)            | 0.89 (0.73, 1.09)              |
| Any NDD                        | 1.06 (0.96, 1.16)                               | 1.19 (1.00, 1.41)            | 1.00 (0.89, 1.12)              |

eTable 18. Characteristics of the cohort for individuals exposed to specific antidepressant classes or drugs during late pregnancy, in MAX

|                                         | <b>SSRI</b>   | <b>SNRI</b>  | <b>TCA</b>   | <b>Sertraline</b> | <b>Fluoxetine</b> | <b>Bupropion</b> | <b>Citalopram</b> | <b>Escitalopram</b> |
|-----------------------------------------|---------------|--------------|--------------|-------------------|-------------------|------------------|-------------------|---------------------|
| Age, mean (SD)                          | 26.0 (5.7)    | 27.9 (5.7)   | 27.1 (6.0)   | 25.8 (5.6)        | 26.0 (5.8)        | 26.2 (5.7)       | 26.4 (5.6)        | 26.1 (5.6)          |
| Age categories, N (%)                   |               |              |              |                   |                   |                  |                   |                     |
| ≤19 years                               | 8,596 (11.8)  | 327 (6.2)    | 359 (10.0)   | 4,088 (12.2)      | 2,260 (12.1)      | 1,519 (11.6)     | 963 (10.5)        | 838 (12.2)          |
| 20-24 years                             | 23,616 (32.3) | 1,219 (23.3) | 974 (27.0)   | 11,227 (33.4)     | 6,007 (32.2)      | 3,998 (30.5)     | 2,730 (29.7)      | 2,103 (30.6)        |
| 25-29 years                             | 21,983 (30.1) | 1,772 (33.8) | 1,088 (30.2) | 10,013 (29.8)     | 5,614 (30.1)      | 4,051 (30.9)     | 2,941 (32.0)      | 2,159 (31.4)        |
| 30-34 years                             | 12,259 (16.8) | 1,208 (23.1) | 736 (20.4)   | 5,444 (16.2)      | 3,043 (16.3)      | 2,276 (17.4)     | 1,721 (18.7)      | 1,165 (17.0)        |
| 35-39 years                             | 5,324 (7.3)   | 560 (10.7)   | 354 (9.8)    | 2,285 (6.8)       | 1,407 (7.5)       | 992 (7.6)        | 691 (7.5)         | 500 (7.3)           |
| ≥40 years                               | 1,228 (1.7)   | 149 (2.8)    | 95 (2.6)     | 510 (1.5)         | 345 (1.8)         | 254 (1.9)        | 158 (1.7)         | 100 (1.5)           |
| Race/<br>ethnicity <sup>1</sup> , N (%) |               |              |              |                   |                   |                  |                   |                     |
| Asian or other Pacific<br>Islander      | 665 (0.9)     | 75 (1.4)     | 72 (2.0)     | 288 (0.9)         | 198 (1.1)         | 111 (0.8)        | 84 (0.9)          | 62 (0.9)            |
| Black or African American               | 10,578 (14.5) | 465 (8.9)    | 777 (21.5)   | 5,110 (15.2)      | 2,825 (15.1)      | 1,803 (13.8)     | 1,238 (13.5)      | 843 (12.3)          |
| Hispanic or Latino                      | 4,148 (5.7)   | 205 (3.9)    | 257 (7.1)    | 2,031 (6.1)       | 1,117 (6.0)       | 530 (4.0)        | 354 (3.8)         | 281 (4.1)           |
| Unknown or other                        | 4,907 (6.7)   | 295 (5.6)    | 237 (6.6)    | 2,275 (6.8)       | 1,314 (7.0)       | 739 (5.6)        | 595 (6.5)         | 480 (7.0)           |
| White                                   | 52,708 (72.2) | 4,195 (80.1) | 2,263 (62.8) | 23,863 (71.1)     | 13,222 (70.8)     | 9,907 (75.7)     | 6,933 (75.3)      | 5,199 (75.7)        |
| Region, N (%)                           |               |              |              |                   |                   |                  |                   |                     |
| Midwest                                 | 32,553 (44.6) | 2,426 (46.3) | 1,327 (36.8) | 14,950 (44.5)     | 8,559 (45.8)      | 5,584 (42.7)     | 4,306 (46.8)      | 3,044 (44.3)        |
| Northeast                               | 11,007 (15.1) | 849 (16.2)   | 522 (14.5)   | 5,494 (16.4)      | 2,652 (14.2)      | 1,586 (12.1)     | 1,279 (13.9)      | 863 (12.6)          |
| South                                   | 19,410 (26.6) | 1,250 (23.9) | 1,159 (32.1) | 8,640 (25.7)      | 4,733 (25.3)      | 4,068 (31.1)     | 2,601 (28.3)      | 2,135 (31.1)        |
| West                                    | 10,036 (13.7) | 710 (13.6)   | 598 (16.6)   | 4,483 (13.4)      | 2,732 (14.6)      | 1,852 (14.1)     | 1,018 (11.1)      | 823 (12.0)          |
| Delivery year, N (%)                    |               |              |              |                   |                   |                  |                   |                     |
| 2000                                    | 38 (0.1)      | 1 (0.0)      | 5 (0.1)      | 19 (0.1)          | 10 (0.1)          | 7 (0.1)          | 2 (0.0)           | 0 (0.0)             |
| 2001                                    | 2,259 (3.1)   | 87 (1.7)     | 176 (4.9)    | 732 (2.2)         | 817 (4.4)         | 296 (2.3)        | 192 (2.1)         | 0 (0.0)             |
| 2002                                    | 3,539 (4.8)   | 124 (2.4)    | 201 (5.6)    | 1,231 (3.7)       | 1,067 (5.7)       | 511 (3.9)        | 395 (4.3)         | 4 (0.1)             |
| 2003                                    | 5,710 (7.8)   | 310 (5.9)    | 285 (7.9)    | 2,271 (6.8)       | 1,507 (8.1)       | 815 (6.2)        | 515 (5.6)         | 281 (4.1)           |
| 2004                                    | 6,920 (9.5)   | 484 (9.2)    | 328 (9.1)    | 2,780 (8.3)       | 1,738 (9.3)       | 1,204 (9.2)      | 400 (4.3)         | 818 (11.9)          |
| 2005                                    | 5,910 (8.1)   | 464 (8.9)    | 299 (8.3)    | 2,456 (7.3)       | 1,532 (8.2)       | 1,181 (9.0)      | 316 (3.4)         | 889 (12.9)          |
| 2006                                    | 5,309 (7.3)   | 382 (7.3)    | 271 (7.5)    | 2,324 (6.9)       | 1,489 (8.0)       | 1,355 (10.4)     | 395 (4.3)         | 791 (11.5)          |
| 2007                                    | 4,994 (6.8)   | 400 (7.6)    | 249 (6.9)    | 2,261 (6.7)       | 1,447 (7.7)       | 1,218 (9.3)      | 538 (5.8)         | 642 (9.4)           |
| 2008                                    | 4,800 (6.6)   | 359 (6.9)    | 247 (6.8)    | 2,309 (6.9)       | 1,283 (6.9)       | 974 (7.4)        | 631 (6.9)         | 543 (7.9)           |
| 2009                                    | 6,359 (8.7)   | 479 (9.1)    | 257 (7.1)    | 3,165 (9.4)       | 1,599 (8.6)       | 1,216 (9.3)      | 892 (9.7)         | 711 (10.4)          |
| 2010                                    | 7,317 (10.0)  | 501 (9.6)    | 292 (8.1)    | 3,770 (11.2)      | 1,706 (9.1)       | 1,163 (8.9)      | 1,171 (12.7)      | 732 (10.7)          |
| 2011                                    | 6,832 (9.4)   | 538 (10.3)   | 300 (8.3)    | 3,513 (10.5)      | 1,590 (8.5)       | 1,094 (8.4)      | 1,167 (12.7)      | 630 (9.2)           |
| 2012                                    | 6,174 (8.5)   | 527 (10.1)   | 333 (9.2)    | 3,109 (9.3)       | 1,404 (7.5)       | 1,025 (7.8)      | 1,236 (13.4)      | 418 (6.1)           |
| 2013                                    | 4,584 (6.3)   | 395 (7.5)    | 239 (6.6)    | 2,420 (7.2)       | 998 (5.3)         | 694 (5.3)        | 913 (9.9)         | 268 (3.9)           |
| 2014                                    | 2,261 (3.1)   | 184 (3.5)    | 124 (3.4)    | 1,207 (3.6)       | 489 (2.6)         | 337 (2.6)        | 441 (4.8)         | 138 (2.0)           |

|                                                 |               |              |              |               |               |               |              |              |
|-------------------------------------------------|---------------|--------------|--------------|---------------|---------------|---------------|--------------|--------------|
| Indications and mental health conditions, N (%) |               |              |              |               |               |               |              |              |
| ADHD                                            | 2,175 (3.0)   | 229 (4.4)    | 103 (2.9)    | 917 (2.7)     | 606 (3.2)     | 501 (3.8)     | 415 (4.5)    | 213 (3.1)    |
| Adjustment disorder                             | 1,387 (1.9)   | 86 (1.6)     | 50 (1.4)     | 645 (1.9)     | 364 (1.9)     | 206 (1.6)     | 185 (2.0)    | 118 (1.7)    |
| Anxiety                                         | 19,544 (26.8) | 1,800 (34.4) | 829 (23.0)   | 8,551 (25.5)  | 4,653 (24.9)  | 2,734 (20.9)  | 2,962 (32.2) | 2,032 (29.6) |
| Behavioral disorder                             | 1,103 (1.5)   | 66 (1.3)     | 26 (0.7)     | 484 (1.4)     | 326 (1.7)     | 185 (1.4)     | 138 (1.5)    | 108 (1.6)    |
| Bipolar disorder                                | 8,981 (12.3)  | 939 (17.9)   | 359 (10.0)   | 3,744 (11.2)  | 2,564 (13.7)  | 1,674 (12.8)  | 1,415 (15.4) | 1,024 (14.9) |
| Chronic fatigue                                 | 6,798 (9.3)   | 600 (11.5)   | 355 (9.8)    | 3,037 (9.0)   | 1,745 (9.3)   | 1,124 (8.6)   | 905 (9.8)    | 710 (10.3)   |
| Depression, nonpsychotic                        | 14,259 (19.5) | 1,321 (25.2) | 498 (13.8)   | 6,157 (18.3)  | 4,169 (22.3)  | 2,287 (17.5)  | 2,051 (22.3) | 1,369 (19.9) |
| Depression, other                               | 27,826 (38.1) | 2,233 (42.7) | 906 (25.1)   | 12,490 (37.2) | 7,564 (40.5)  | 4,395 (33.6)  | 3,812 (41.4) | 2,627 (38.3) |
| Depression, psychotic                           | 1,347 (1.8)   | 122 (2.3)    | 69 (1.9)     | 506 (1.5)     | 434 (2.3)     | 230 (1.8)     | 199 (2.2)    | 149 (2.2)    |
| Epilepsy/convulsion                             | 1,991 (2.7)   | 200 (3.8)    | 217 (6.0)    | 847 (2.5)     | 545 (2.9)     | 220 (1.7)     | 282 (3.1)    | 216 (3.1)    |
| Migraine/headache                               | 16,206 (22.2) | 1,368 (26.1) | 1,665 (46.2) | 7,258 (21.6)  | 4,225 (22.6)  | 2,814 (21.5)  | 2,211 (24.0) | 1,630 (23.7) |
| Other developmental disorders <sup>2</sup>      | 511 (0.7)     | 31 (0.6)     | 31 (0.9)     | 235 (0.7)     | 144 (0.8)     | 71 (0.5)      | 60 (0.7)     | 53 (0.8)     |
| Other mental health disorders <sup>3</sup>      | 2,768 (3.8)   | 271 (5.2)    | 221 (6.1)    | 1,178 (3.5)   | 771 (4.1)     | 446 (3.4)     | 395 (4.3)    | 268 (3.9)    |
| Personality disorder                            | 1,530 (2.1)   | 154 (2.9)    | 70 (1.9)     | 620 (1.8)     | 463 (2.5)     | 261 (2.0)     | 224 (2.4)    | 172 (2.5)    |
| Psychosis                                       | 1,026 (1.4)   | 77 (1.5)     | 44 (1.2)     | 429 (1.3)     | 298 (1.6)     | 155 (1.2)     | 160 (1.7)    | 106 (1.5)    |
| Schizophrenia                                   | 943 (1.3)     | 68 (1.3)     | 43 (1.2)     | 325 (1.0)     | 317 (1.7)     | 152 (1.2)     | 154 (1.7)    | 108 (1.6)    |
| Sleep disorder                                  | 3,031 (4.2)   | 330 (6.3)    | 276 (7.7)    | 1,294 (3.9)   | 795 (4.3)     | 506 (3.9)     | 485 (5.3)    | 347 (5.1)    |
| Psychiatric visits, N (%)                       |               |              |              |               |               |               |              |              |
| 0 visits                                        | 62,400 (85.5) | 4,166 (79.6) | 3,186 (88.4) | 29,118 (86.7) | 15,843 (84.8) | 11,191 (85.5) | 7,470 (81.2) | 5,692 (82.9) |
| 1 visit                                         | 2,856 (3.9)   | 256 (4.9)    | 98 (2.7)     | 1,223 (3.6)   | 755 (4.0)     | 449 (3.4)     | 475 (5.2)    | 297 (4.3)    |
| 2-3 visits                                      | 2,846 (3.9)   | 276 (5.3)    | 117 (3.2)    | 1,199 (3.6)   | 749 (4.0)     | 518 (4.0)     | 448 (4.9)    | 310 (4.5)    |
| 4+ visits                                       | 4,904 (6.7)   | 537 (10.3)   | 205 (5.7)    | 2,027 (6.0)   | 1,329 (7.1)   | 932 (7.1)     | 811 (8.8)    | 566 (8.2)    |
| Mental health diagnoses, N (%)                  |               |              |              |               |               |               |              |              |
| 0 diagnoses                                     | 32,475 (44.5) | 1,653 (31.6) | 1,866 (51.7) | 16,101 (48.0) | 7,951 (42.6)  | 6,201 (47.4)  | 3,337 (36.3) | 2,796 (40.7) |
| 1 diagnosis                                     | 14,639 (20.1) | 981 (18.7)   | 613 (17.0)   | 6,639 (19.8)  | 3,762 (20.1)  | 2,475 (18.9)  | 1,947 (21.2) | 1,293 (18.8) |
| 2-3 diagnoses                                   | 16,521 (22.6) | 1,546 (29.5) | 694 (19.2)   | 7,042 (21.0)  | 4,339 (23.2)  | 2,767 (21.1)  | 2,378 (25.8) | 1,734 (25.3) |
| 4+ diagnoses                                    | 9,371 (12.8)  | 1,055 (20.2) | 433 (12.0)   | 3,785 (11.3)  | 2,624 (14.1)  | 1,647 (12.6)  | 1,542 (16.8) | 1,042 (15.2) |
| Mental health ER visits, N (%)                  |               |              |              |               |               |               |              |              |
| 0 visits                                        | 66,981 (91.7) | 4,680 (89.4) | 3,325 (92.2) | 30,979 (92.3) | 17,050 (91.3) | 12,112 (92.5) | 8,346 (90.7) | 6,198 (90.3) |
| 1 visit                                         | 4,113 (5.6)   | 345 (6.6)    | 199 (5.5)    | 1,800 (5.4)   | 1,090 (5.8)   | 682 (5.2)     | 555 (6.0)    | 448 (6.5)    |
| 2-3 visits                                      | 1,641 (2.2)   | 178 (3.4)    | 70 (1.9)     | 688 (2.0)     | 454 (2.4)     | 258 (2.0)     | 260 (2.8)    | 185 (2.7)    |
| 4+ visits                                       | 271 (0.4)     | 32 (0.6)     | 12 (0.3)     | 100 (0.3)     | 82 (0.4)      | 38 (0.3)      | 43 (0.5)     | 34 (0.5)     |
| Mental health hospitalizations, N (%)           |               |              |              |               |               |               |              |              |
| 0 visits                                        | 68,729 (94.1) | 4,840 (92.5) | 3,375 (93.6) | 31,842 (94.9) | 17,400 (93.2) | 12,352 (94.4) | 8,611 (93.6) | 6,419 (93.5) |
| 1 visit                                         | 1,977 (2.7)   | 169 (3.2)    | 123 (3.4)    | 849 (2.5)     | 553 (3.0)     | 343 (2.6)     | 252 (2.7)    | 198 (2.9)    |
| 2-3 visits                                      | 1,546 (2.1)   | 140 (2.7)    | 60 (1.7)     | 596 (1.8)     | 463 (2.5)     | 253 (1.9)     | 223 (2.4)    | 170 (2.5)    |
| 4+ visits                                       | 754 (1.0)     | 86 (1.6)     | 48 (1.3)     | 280 (0.8)     | 260 (1.4)     | 142 (1.1)     | 118 (1.3)    | 78 (1.1)     |

|                                                  |               |              |              |               |               |               |              |              |
|--------------------------------------------------|---------------|--------------|--------------|---------------|---------------|---------------|--------------|--------------|
| Other psychiatric medications, N (%)             |               |              |              |               |               |               |              |              |
| 0 drugs                                          | 57,010 (78.1) | 3,123 (59.7) | 2,528 (70.1) | 27,241 (81.2) | 14,259 (76.3) | 10,262 (78.4) | 6,660 (72.4) | 4,897 (71.3) |
| 1 drug                                           | 5,506 (7.5)   | 515 (9.8)    | 349 (9.7)    | 2,313 (6.9)   | 1,517 (8.1)   | 931 (7.1)     | 794 (8.6)    | 625 (9.1)    |
| 2-3 drugs                                        | 7,737 (10.6)  | 1,077 (20.6) | 496 (13.8)   | 3,009 (9.0)   | 2,106 (11.3)  | 1,321 (10.1)  | 1,313 (14.3) | 948 (13.8)   |
| 4+ drugs                                         | 2,753 (3.8)   | 520 (9.9)    | 233 (6.5)    | 1,004 (3.0)   | 794 (4.3)     | 576 (4.4)     | 437 (4.7)    | 395 (5.8)    |
| Outpatient visits (based on quartiles), N (%)    |               |              |              |               |               |               |              |              |
| Low                                              | 8,126 (11.1)  | 454 (8.7)    | 383 (10.6)   | 3,818 (11.4)  | 1,966 (10.5)  | 1,529 (11.7)  | 846 (9.2)    | 683 (9.9)    |
| Low to moderate                                  | 13,054 (17.9) | 756 (14.4)   | 540 (15.0)   | 6,198 (18.5)  | 3,323 (17.8)  | 2,409 (18.4)  | 1,410 (15.3) | 1,131 (16.5) |
| Moderate to high                                 | 14,001 (19.2) | 918 (17.5)   | 631 (17.5)   | 6,557 (19.5)  | 3,472 (18.6)  | 2,623 (20.0)  | 1,735 (18.9) | 1,244 (18.1) |
| High                                             | 37,825 (51.8) | 3,107 (59.4) | 2,052 (56.9) | 16,994 (50.6) | 9,915 (53.1)  | 6,529 (49.9)  | 5,213 (56.6) | 3,807 (55.5) |
| Hospitalizations, N (%)                          |               |              |              |               |               |               |              |              |
| 0 visits                                         | 63,509 (87.0) | 4,538 (86.7) | 3,009 (83.4) | 29,421 (87.6) | 16,013 (85.7) | 11,410 (87.2) | 8,036 (87.3) | 5,956 (86.8) |
| 1 visit                                          | 6,140 (8.4)   | 458 (8.7)    | 353 (9.8)    | 2,752 (8.2)   | 1,690 (9.0)   | 1,090 (8.3)   | 750 (8.1)    | 591 (8.6)    |
| 2-3 visits                                       | 2,164 (3.0)   | 157 (3.0)    | 144 (4.0)    | 910 (2.7)     | 614 (3.3)     | 369 (2.8)     | 268 (2.9)    | 202 (2.9)    |
| 4+ visits                                        | 1,193 (1.6)   | 82 (1.6)     | 100 (2.8)    | 484 (1.4)     | 359 (1.9)     | 221 (1.7)     | 150 (1.6)    | 116 (1.7)    |
| Lifestyle behaviors/<br>environmental, N (%)     |               |              |              |               |               |               |              |              |
| Alcohol abuse                                    | 2,676 (3.7)   | 225 (4.3)    | 93 (2.6)     | 1,106 (3.3)   | 744 (4.0)     | 445 (3.4)     | 415 (4.5)    | 269 (3.9)    |
| Tobacco use                                      | 13,068 (17.9) | 1,118 (21.4) | 684 (19.0)   | 6,029 (18.0)  | 3,296 (17.6)  | 3,074 (23.5)  | 2,041 (22.2) | 1,248 (18.2) |
| Substance abuse                                  | 7,684 (10.5)  | 789 (15.1)   | 520 (14.4)   | 3,153 (9.4)   | 2,154 (11.5)  | 1,538 (11.7)  | 1,229 (13.4) | 826 (12.0)   |
| Hyperemesis/nausea and vomiting in pregnancy     | 20,153 (27.6) | 1,526 (29.1) | 1,084 (30.1) | 9,419 (28.1)  | 5,080 (27.2)  | 3,282 (25.1)  | 2,739 (29.8) | 1,932 (28.1) |
| Poor nutrition                                   | 1,721 (2.4)   | 138 (2.6)    | 142 (3.9)    | 791 (2.4)     | 454 (2.4)     | 307 (2.3)     | 290 (3.2)    | 166 (2.4)    |
| Start of prenatal care, gestational month, N (%) |               |              |              |               |               |               |              |              |
| Month 1                                          | 4,189 (5.7)   | 269 (5.1)    | 150 (4.2)    | 1,931 (5.8)   | 1,109 (5.9)   | 767 (5.9)     | 535 (5.8)    | 390 (5.7)    |
| Month 2                                          | 27,060 (37.1) | 1,895 (36.2) | 1,094 (30.3) | 12,602 (37.5) | 6,853 (36.7)  | 4,825 (36.9)  | 3,464 (37.6) | 2,530 (36.9) |
| Month 3                                          | 17,676 (24.2) | 1,299 (24.8) | 821 (22.8)   | 8,350 (24.9)  | 4,532 (24.3)  | 3,169 (24.2)  | 2,209 (24.0) | 1,645 (24.0) |
| Month 4                                          | 7,430 (10.2)  | 538 (10.3)   | 407 (11.3)   | 3,470 (10.3)  | 1,922 (10.3)  | 1,391 (10.6)  | 928 (10.1)   | 657 (9.6)    |
| Month 5                                          | 4,648 (6.4)   | 313 (6.0)    | 280 (7.8)    | 2,101 (6.3)   | 1,193 (6.4)   | 844 (6.4)     | 565 (6.1)    | 444 (6.5)    |
| Month 6                                          | 2,352 (3.2)   | 211 (4.0)    | 162 (4.5)    | 1,086 (3.2)   | 590 (3.2)     | 451 (3.4)     | 294 (3.2)    | 204 (3.0)    |
| Month 7                                          | 1,911 (2.6)   | 147 (2.8)    | 146 (4.0)    | 817 (2.4)     | 506 (2.7)     | 324 (2.5)     | 260 (2.8)    | 162 (2.4)    |
| Month 8                                          | 1,234 (1.7)   | 111 (2.1)    | 105 (2.9)    | 497 (1.5)     | 330 (1.8)     | 203 (1.6)     | 158 (1.7)    | 119 (1.7)    |
| Month 9                                          | 1,195 (1.6)   | 107 (2.0)    | 84 (2.3)     | 468 (1.4)     | 296 (1.6)     | 229 (1.7)     | 168 (1.8)    | 143 (2.1)    |
| No prenatal care                                 | 5,311 (7.3)   | 345 (6.6)    | 357 (9.9)    | 2,245 (6.7)   | 1,345 (7.2)   | 887 (6.8)     | 623 (6.8)    | 571 (8.3)    |
| Prenatal care index, N (%)                       |               |              |              |               |               |               |              |              |
| Adequate plus                                    | 17,745 (24.3) | 1,209 (23.1) | 793 (22.0)   | 8,581 (25.6)  | 4,412 (23.6)  | 3,229 (24.7)  | 1,984 (21.6) | 1,761 (25.7) |
| Adequate                                         | 10,171 (13.9) | 703 (13.4)   | 437 (12.1)   | 4,814 (14.3)  | 2,608 (14.0)  | 1,781 (13.6)  | 1,299 (14.1) | 883 (12.9)   |
| Intermediate                                     | 12,276 (16.8) | 924 (17.7)   | 523 (14.5)   | 5,743 (17.1)  | 3,183 (17.0)  | 2,264 (17.3)  | 1,685 (18.3) | 1,034 (15.1) |
| Inadequate                                       | 32,814 (44.9) | 2,399 (45.8) | 1,853 (51.4) | 14,429 (43.0) | 8,473 (45.4)  | 5,816 (44.4)  | 4,236 (46.0) | 3,187 (46.4) |
| Start of prenatal vitamins, N (%)                |               |              |              |               |               |               |              |              |



|                                                  |               |              |              |               |              |              |              |              |
|--------------------------------------------------|---------------|--------------|--------------|---------------|--------------|--------------|--------------|--------------|
| 3 <sup>rd</sup> month prior to LMP               | 1,826 (2.5)   | 147 (2.8)    | 89 (2.5)     | 850 (2.5)     | 485 (2.6)    | 301 (2.3)    | 233 (2.5)    | 155 (2.3)    |
| 2 <sup>nd</sup> month prior to LMP               | 1,087 (1.5)   | 74 (1.4)     | 50 (1.4)     | 496 (1.5)     | 299 (1.6)    | 182 (1.4)    | 139 (1.5)    | 96 (1.4)     |
| 1 <sup>st</sup> month prior to LMP               | 848 (1.2)     | 60 (1.1)     | 43 (1.2)     | 400 (1.2)     | 219 (1.2)    | 132 (1.0)    | 115 (1.2)    | 72 (1.0)     |
| Month 1                                          | 5,268 (7.2)   | 335 (6.4)    | 207 (5.7)    | 2,401 (7.2)   | 1,372 (7.3)  | 895 (6.8)    | 695 (7.6)    | 473 (6.9)    |
| Month 2                                          | 19,649 (26.9) | 1,327 (25.3) | 953 (26.4)   | 9,014 (26.9)  | 5,058 (27.1) | 3,487 (26.6) | 2,444 (26.6) | 1,899 (27.7) |
| Month 3                                          | 10,024 (13.7) | 749 (14.3)   | 478 (13.3)   | 4,575 (13.6)  | 2,597 (13.9) | 1,918 (14.7) | 1,171 (12.7) | 961 (14.0)   |
| Month 4                                          | 5,010 (6.9)   | 313 (6.0)    | 253 (7.0)    | 2,303 (6.9)   | 1,276 (6.8)  | 954 (7.3)    | 598 (6.5)    | 479 (7.0)    |
| Month 5                                          | 3,277 (4.5)   | 214 (4.1)    | 191 (5.3)    | 1,495 (4.5)   | 821 (4.4)    | 675 (5.2)    | 407 (4.4)    | 302 (4.4)    |
| Month 6                                          | 2,265 (3.1)   | 177 (3.4)    | 169 (4.7)    | 1,027 (3.1)   | 597 (3.2)    | 429 (3.3)    | 290 (3.2)    | 204 (3.0)    |
| Month 7                                          | 1,600 (2.2)   | 121 (2.3)    | 98 (2.7)     | 698 (2.1)     | 410 (2.2)    | 290 (2.2)    | 213 (2.3)    | 150 (2.2)    |
| Month 8                                          | 970 (1.3)     | 60 (1.1)     | 54 (1.5)     | 429 (1.3)     | 247 (1.3)    | 202 (1.5)    | 127 (1.4)    | 99 (1.4)     |
| Month 9                                          | 444 (0.6)     | 33 (0.6)     | 25 (0.7)     | 195 (0.6)     | 116 (0.6)    | 87 (0.7)     | 58 (0.6)     | 45 (0.7)     |
| No prenatal vitamins                             | 20,738 (28.4) | 1,625 (31.0) | 996 (27.6)   | 9,684 (28.8)  | 5,179 (27.7) | 3,538 (27.0) | 2,714 (29.5) | 1,930 (28.1) |
| Comorbidities, N (%)                             |               |              |              |               |              |              |              |              |
| Asthma                                           | 8,691 (11.9)  | 660 (12.6)   | 569 (15.8)   | 3,866 (11.5)  | 2,293 (12.3) | 1,517 (11.6) | 1,127 (12.2) | 854 (12.4)   |
| Autoimmune disorder                              | 1,441 (2.0)   | 178 (3.4)    | 115 (3.2)    | 634 (1.9)     | 378 (2.0)    | 220 (1.7)    | 203 (2.2)    | 136 (2.0)    |
| Pregestational diabetes                          | 6,387 (8.7)   | 591 (11.3)   | 382 (10.6)   | 2,909 (8.7)   | 1,622 (8.7)  | 1,137 (8.7)  | 831 (9.0)    | 601 (8.8)    |
| GBS infection                                    | 3,484 (4.8)   | 233 (4.5)    | 146 (4.0)    | 1,702 (5.1)   | 866 (4.6)    | 602 (4.6)    | 440 (4.8)    | 304 (4.4)    |
| Pregestational hypertension                      | 5,119 (7.0)   | 540 (10.3)   | 414 (11.5)   | 2,382 (7.1)   | 1,169 (6.3)  | 989 (7.6)    | 711 (7.7)    | 503 (7.3)    |
| Influenza                                        | 1,391 (1.9)   | 102 (1.9)    | 83 (2.3)     | 668 (2.0)     | 320 (1.7)    | 242 (1.8)    | 178 (1.9)    | 149 (2.2)    |
| Other STD infection                              | 3,553 (4.9)   | 198 (3.8)    | 149 (4.1)    | 1,665 (5.0)   | 931 (5.0)    | 664 (5.1)    | 420 (4.6)    | 353 (5.1)    |
| Overweight/obesity                               | 5,564 (7.6)   | 505 (9.6)    | 335 (9.3)    | 2,740 (8.2)   | 1,353 (7.2)  | 994 (7.6)    | 827 (9.0)    | 489 (7.1)    |
| Renal disease                                    | 311 (0.4)     | 19 (0.4)     | 21 (0.6)     | 150 (0.4)     | 75 (0.4)     | 45 (0.3)     | 38 (0.4)     | 22 (0.3)     |
| TORCH infection                                  | 2,814 (3.9)   | 193 (3.7)    | 160 (4.4)    | 1,248 (3.7)   | 744 (4.0)    | 540 (4.1)    | 402 (4.4)    | 266 (3.9)    |
| Obstetric Comorbidity Index <sup>4</sup> , N (%) |               |              |              |               |              |              |              |              |
| 0                                                | 31,251 (42.8) | 1,789 (34.2) | 1,221 (33.9) | 14,664 (43.7) | 7,928 (42.5) | 5,392 (41.2) | 3,729 (40.5) | 2,807 (40.9) |
| 1                                                | 17,337 (23.7) | 1,211 (23.1) | 809 (22.4)   | 7,979 (23.8)  | 4,405 (23.6) | 3,055 (23.3) | 2,204 (23.9) | 1,619 (23.6) |
| 2                                                | 11,677 (16.0) | 916 (17.5)   | 635 (17.6)   | 5,314 (15.8)  | 2,983 (16.0) | 2,263 (17.3) | 1,541 (16.7) | 1,155 (16.8) |
| 3+                                               | 12,741 (17.5) | 1,319 (25.2) | 941 (26.1)   | 5,610 (16.7)  | 3,360 (18.0) | 2,380 (18.2) | 1,730 (18.8) | 1,284 (18.7) |
| Other prescription medications, N (%)            |               |              |              |               |              |              |              |              |
| Anticonvulsants                                  | 7,504 (10.3)  | 1,087 (20.8) | 752 (20.9)   | 2,976 (8.9)   | 2,052 (11.0) | 1,448 (11.1) | 1,240 (13.5) | 920 (13.4)   |
| Antidiabetics                                    | 2,497 (3.4)   | 250 (4.8)    | 166 (4.6)    | 1,101 (3.3)   | 627 (3.4)    | 487 (3.7)    | 348 (3.8)    | 268 (3.9)    |
| Antihypertensives                                | 8,866 (12.1)  | 997 (19.0)   | 807 (22.4)   | 3,809 (11.3)  | 2,251 (12.1) | 1,670 (12.8) | 1,258 (13.7) | 957 (13.9)   |
| Antipsychotics                                   | 7,707 (10.6)  | 1,042 (19.9) | 410 (11.4)   | 2,921 (8.7)   | 2,297 (12.3) | 1,338 (10.2) | 1,173 (12.7) | 1,025 (14.9) |
| Anxiolytics                                      | 2,935 (4.0)   | 311 (5.9)    | 182 (5.0)    | 1,239 (3.7)   | 780 (4.2)    | 581 (4.4)    | 458 (5.0)    | 327 (4.8)    |
| Barbiturates                                     | 4,848 (6.6)   | 439 (8.4)    | 587 (16.3)   | 2,128 (6.3)   | 1,201 (6.4)  | 914 (7.0)    | 659 (7.2)    | 560 (8.2)    |
| Benzodiazepines                                  | 14,816 (20.3) | 1,905 (36.4) | 956 (26.5)   | 5,918 (17.6)  | 3,735 (20.0) | 2,253 (17.2) | 2,305 (25.0) | 1,877 (27.3) |
| Corticosteroids                                  | 21,338 (29.2) | 1,761 (33.6) | 1,413 (39.2) | 9,523 (28.4)  | 5,396 (28.9) | 3,785 (28.9) | 2,948 (32.0) | 2,140 (31.2) |
| Insulin                                          | 2,649 (3.6)   | 271 (5.2)    | 186 (5.2)    | 1,177 (3.5)   | 695 (3.7)    | 475 (3.6)    | 327 (3.6)    | 236 (3.4)    |
| NSAIDs                                           | 24,816 (34.0) | 2,064 (39.4) | 1,913 (53.1) | 11,095 (33.1) | 6,451 (34.5) | 4,399 (33.6) | 3,317 (36.0) | 2,462 (35.9) |

|                                                                                               |               |              |              |               |               |               |              |              |
|-----------------------------------------------------------------------------------------------|---------------|--------------|--------------|---------------|---------------|---------------|--------------|--------------|
| Opioids                                                                                       | 40,320 (55.2) | 3,266 (62.4) | 2,568 (71.2) | 18,214 (54.3) | 10,433 (55.9) | 7,398 (56.5)  | 5,370 (58.3) | 4,050 (59.0) |
| Other hypnotics                                                                               | 16,346 (22.4) | 1,478 (28.2) | 1,018 (28.2) | 7,298 (21.7)  | 4,207 (22.5)  | 2,836 (21.7)  | 2,385 (25.9) | 1,724 (25.1) |
| OID treatment                                                                                 | 1,411 (1.9)   | 236 (4.5)    | 115 (3.2)    | 568 (1.7)     | 362 (1.9)     | 316 (2.4)     | 308 (3.3)    | 164 (2.4)    |
| Progestins                                                                                    | 5,379 (7.4)   | 389 (7.4)    | 270 (7.5)    | 2,502 (7.5)   | 1,327 (7.1)   | 976 (7.5)     | 721 (7.8)    | 552 (8.0)    |
| Psychostimulants                                                                              | 2,654 (3.6)   | 344 (6.6)    | 177 (4.9)    | 1,062 (3.2)   | 738 (4.0)     | 592 (4.5)     | 479 (5.2)    | 301 (4.4)    |
| Known teratogens                                                                              | 976 (1.3)     | 133 (2.5)    | 75 (2.1)     | 378 (1.1)     | 285 (1.5)     | 204 (1.6)     | 136 (1.5)    | 124 (1.8)    |
| Suspected teratogens                                                                          | 19,265 (26.4) | 1,463 (27.9) | 1,086 (30.1) | 8,917 (26.6)  | 4,771 (25.5)  | 3,556 (27.2)  | 2,655 (28.8) | 1,908 (27.8) |
| Triptans                                                                                      | 2,613 (3.6)   | 327 (6.2)    | 437 (12.1)   | 1,074 (3.2)   | 681 (3.6)     | 529 (4.0)     | 400 (4.3)    | 280 (4.1)    |
| Proximity to metropolitan area, N (%)                                                         |               |              |              |               |               |               |              |              |
| Metropolitan                                                                                  | 57,047 (79.4) | 4,065 (78.9) | 2,792 (79.5) | 26,935 (81.6) | 14,466 (78.7) | 10,037 (78.4) | 6,973 (77.0) | 5,188 (76.9) |
| Non-metropolitan                                                                              | 12,677 (17.7) | 939 (18.2)   | 617 (17.6)   | 5,246 (15.9)  | 3,382 (18.4)  | 2,366 (18.5)  | 1,735 (19.2) | 1,363 (20.2) |
| Rural                                                                                         | 2,094 (2.9)   | 149 (2.9)    | 104 (3.0)    | 843 (2.6)     | 541 (2.9)     | 399 (3.1)     | 349 (3.9)    | 198 (2.9)    |
| Percentage of Population with ≤ High School Diploma (Based on Quartiles) <sup>5</sup> , N (%) |               |              |              |               |               |               |              |              |
| Low                                                                                           | 20,952 (29.2) | 1,477 (28.7) | 886 (25.2)   | 9,920 (30.0)  | 5,292 (28.8)  | 3,658 (28.6)  | 2,790 (30.8) | 1,761 (26.1) |
| Low to moderate                                                                               | 15,528 (21.6) | 1,080 (21.0) | 754 (21.5)   | 7,364 (22.3)  | 3,967 (21.6)  | 2,648 (20.7)  | 1,869 (20.6) | 1,451 (21.5) |
| Moderate to high                                                                              | 15,724 (21.9) | 1,187 (23.0) | 808 (23.0)   | 7,090 (21.5)  | 4,049 (22.0)  | 2,854 (22.3)  | 1,763 (19.5) | 1,617 (24.0) |
| High                                                                                          | 19,611 (27.3) | 1,409 (27.3) | 1,065 (30.3) | 8,649 (26.2)  | 5,081 (27.6)  | 3,642 (28.4)  | 2,635 (29.1) | 1,919 (28.4) |
| Poverty Rate (Based on Quartiles) <sup>5</sup> , N (%)                                        |               |              |              |               |               |               |              |              |
| Low                                                                                           | 24,882 (34.6) | 1,831 (35.5) | 984 (28.0)   | 11,444 (34.7) | 6,461 (35.1)  | 4,194 (32.8)  | 3,305 (36.5) | 2,186 (32.4) |
| Low to moderate                                                                               | 16,349 (22.8) | 1,180 (22.9) | 778 (22.1)   | 7,758 (23.5)  | 4,171 (22.7)  | 2,857 (22.3)  | 1,958 (21.6) | 1,506 (22.3) |
| Moderate to high                                                                              | 19,293 (26.9) | 1,389 (27.0) | 1,018 (29.0) | 8,944 (27.1)  | 4,835 (26.3)  | 3,551 (27.7)  | 2,355 (26.0) | 1,888 (28.0) |
| High                                                                                          | 11,289 (15.7) | 753 (14.6)   | 733 (20.9)   | 4,877 (14.8)  | 2,922 (15.9)  | 2,200 (17.2)  | 1,438 (15.9) | 1,168 (17.3) |
| Unemployment Rate (Based on Quartiles) <sup>5</sup> , N (%)                                   |               |              |              |               |               |               |              |              |
| Low                                                                                           | 24,861 (34.6) | 1,848 (35.9) | 1,026 (29.2) | 11,578 (35.1) | 6,157 (33.5)  | 4,425 (34.6)  | 3,328 (36.7) | 2,525 (37.4) |
| Low to moderate                                                                               | 18,928 (26.4) | 1,374 (26.7) | 923 (26.3)   | 8,942 (27.1)  | 4,807 (26.1)  | 3,373 (26.3)  | 2,414 (26.7) | 1,661 (24.6) |
| Moderate to high                                                                              | 14,251 (19.8) | 965 (18.7)   | 805 (22.9)   | 6,471 (19.6)  | 3,748 (20.4)  | 2,442 (19.1)  | 1,779 (19.6) | 1,261 (18.7) |
| High                                                                                          | 13,774 (19.2) | 966 (18.7)   | 759 (21.6)   | 6,032 (18.3)  | 3,677 (20.0)  | 2,562 (20.0)  | 1,536 (17.0) | 1,301 (19.3) |

<sup>1</sup>Race/ethnicity was determined based on information submitted to the Centers for Medicare & Medicaid Services by individual states, which was based on information that had been collected and coded from Medicaid applications.

<sup>2</sup>Other neurodevelopmental disorders include autism spectrum disorder, speech/language disorder, developmental coordination disorder, intellectual disability, and specific learning disorder.

<sup>3</sup>Other mental health disorders include delirium, dementia, tic disorder, somatoform spectrum disorder, eating disorder, psychotherapy, self-inflicted injury.

<sup>4</sup>As defined by Bateman et al. (2013): Development of a comorbidity index for use in obstetric patients.<sup>1</sup>

<sup>5</sup>County-level SES-measures were assessed after linkage of zip codes (only available in MAX) with corresponding FIPS county codes using crosswalk files provided by the US Department of Housing and Urban Development; these FIPS codes were then used to merge the MAX data with data provided by the US Department of Agriculture which include county-level information on various SES-measures. Metropolitan area is defined as counties in metropolitan areas or counties with urban population of 20,000 or more, adjacent to a metropolitan area; urban area is defined as counties with urban population of 20,000 or more, not adjacent to a metropolitan area, or counties with populations of 2,500 to 19,999 residents; rural area is defined as counties with a population of less than 2,500. Categories of unemployment rate, poverty rate and rate of educational attainment reflect year-specific quartiles.

eTable 19. Characteristics of the cohort for individuals exposed to specific antidepressant classes or drugs during late pregnancy, in MarketScan

|                                                 | <b>SSRI</b>   | <b>SNRI</b>  | <b>TCA</b> | <b>Sertraline</b> | <b>Fluoxetine</b> | <b>Bupropion</b> | <b>Citalopram</b> | <b>Escitalopram</b> |
|-------------------------------------------------|---------------|--------------|------------|-------------------|-------------------|------------------|-------------------|---------------------|
| Age, mean (SD)                                  | 32.7 (4.6)    | 33.2 (4.5)   | 32.8 (5.1) | 32.6 (4.5)        | 32.9 (4.7)        | 32.9 (4.7)       | 32.6 (4.6)        | 32.8 (4.5)          |
| Age categories, N (%)                           |               |              |            |                   |                   |                  |                   |                     |
| ≤19 years                                       | 63 (0.1)      | 5 (0.1)      | 4 (0.5)    | 34 (0.1)          | 9 (0.1)           | 13 (0.2)         | 6 (0.1)           | 10 (0.1)            |
| 20-24 years                                     | 1,285 (3.0)   | 71 (2.0)     | 34 (4.0)   | 690 (3.0)         | 259 (3.1)         | 212 (3.2)        | 139 (2.9)         | 176 (2.6)           |
| 25-29 years                                     | 9,403 (21.7)  | 680 (19.3)   | 185 (21.8) | 5,031 (22.1)      | 1,699 (20.5)      | 1,380 (20.8)     | 1,089 (22.8)      | 1,435 (21.5)        |
| 30-34 years                                     | 17,684 (40.8) | 1,417 (40.2) | 319 (37.6) | 9,458 (41.5)      | 3,263 (39.4)      | 2,563 (38.6)     | 1,944 (40.7)      | 2,694 (40.4)        |
| 35-39 years                                     | 11,855 (27.3) | 1,041 (29.5) | 221 (26.1) | 6,075 (26.7)      | 2,401 (29.0)      | 1,930 (29.1)     | 1,252 (26.2)      | 1,876 (28.1)        |
| ≥40 years                                       | 3,061 (7.1)   | 311 (8.8)    | 85 (10.0)  | 1,499 (6.6)       | 656 (7.9)         | 540 (8.1)        | 341 (7.1)         | 477 (7.2)           |
| Region, N (%)                                   |               |              |            |                   |                   |                  |                   |                     |
| Midwest                                         | 13,363 (30.8) | 982 (27.9)   | 243 (28.7) | 7,198 (31.6)      | 2,468 (29.8)      | 1,909 (28.8)     | 1,497 (31.4)      | 2,013 (30.2)        |
| Northeast                                       | 5,782 (13.3)  | 437 (12.4)   | 123 (14.5) | 3,021 (13.3)      | 1,197 (14.4)      | 570 (8.6)        | 677 (14.2)        | 769 (11.5)          |
| South                                           | 17,015 (39.2) | 1,558 (44.2) | 307 (36.2) | 8,947 (39.3)      | 3,173 (38.3)      | 3,055 (46.0)     | 1,631 (34.2)      | 2,932 (44.0)        |
| West                                            | 6,628 (15.3)  | 497 (14.1)   | 165 (19.5) | 3,301 (14.5)      | 1,340 (16.2)      | 1,022 (15.4)     | 907 (19.0)        | 882 (13.2)          |
| Delivery year, N (%)                            |               |              |            |                   |                   |                  |                   |                     |
| 2003                                            | 44 (0.1)      | 4 (0.1)      | 1 (0.1)    | 22 (0.1)          | 10 (0.1)          | 8 (0.1)          | 0 (0.0)           | 4 (0.1)             |
| 2004                                            | 1,848 (4.3)   | 117 (3.3)    | 45 (5.3)   | 731 (3.2)         | 489 (5.9)         | 263 (4.0)        | 148 (3.1)         | 189 (2.8)           |
| 2005                                            | 2,472 (5.7)   | 184 (5.2)    | 65 (7.7)   | 1,061 (4.7)       | 607 (7.3)         | 387 (5.8)        | 140 (2.9)         | 348 (5.2)           |
| 2006                                            | 2,534 (5.8)   | 209 (5.9)    | 68 (8.0)   | 1,234 (5.4)       | 592 (7.1)         | 497 (7.5)        | 156 (3.3)         | 407 (6.1)           |
| 2007                                            | 2,926 (6.7)   | 279 (7.9)    | 53 (6.3)   | 1,571 (6.9)       | 601 (7.3)         | 579 (8.7)        | 206 (4.3)         | 470 (7.0)           |
| 2008                                            | 3,493 (8.1)   | 308 (8.7)    | 71 (8.4)   | 1,804 (7.9)       | 673 (8.1)         | 633 (9.5)        | 323 (6.8)         | 653 (9.8)           |
| 2009                                            | 5,165 (11.9)  | 436 (12.4)   | 88 (10.4)  | 2,904 (12.7)      | 940 (11.3)        | 752 (11.3)       | 456 (9.6)         | 874 (13.1)          |
| 2010                                            | 5,127 (11.8)  | 411 (11.7)   | 90 (10.6)  | 2,851 (12.5)      | 932 (11.2)        | 749 (11.3)       | 571 (12.0)        | 779 (11.7)          |
| 2011                                            | 5,522 (12.7)  | 451 (12.8)   | 92 (10.8)  | 3,071 (13.5)      | 974 (11.8)        | 788 (11.9)       | 673 (14.1)        | 800 (12.0)          |
| 2012                                            | 4,635 (10.7)  | 391 (11.1)   | 94 (11.1)  | 2,479 (10.9)      | 840 (10.1)        | 679 (10.2)       | 658 (13.8)        | 670 (10.0)          |
| 2013                                            | 3,913 (9.0)   | 317 (9.0)    | 73 (8.6)   | 2,043 (9.0)       | 698 (8.4)         | 575 (8.7)        | 599 (12.6)        | 582 (8.7)           |
| 2014                                            | 3,929 (9.1)   | 284 (8.1)    | 67 (7.9)   | 2,085 (9.1)       | 647 (7.8)         | 510 (7.7)        | 574 (12.0)        | 627 (9.4)           |
| 2015                                            | 1,743 (4.0)   | 134 (3.8)    | 41 (4.8)   | 931 (4.1)         | 284 (3.4)         | 218 (3.3)        | 267 (5.6)         | 265 (4.0)           |
| Indications and mental health conditions, N (%) |               |              |            |                   |                   |                  |                   |                     |
| ADHD                                            | 740 (1.7)     | 103 (2.9)    | 13 (1.5)   | 333 (1.5)         | 182 (2.2)         | 239 (3.6)        | 102 (2.1)         | 128 (1.9)           |
| Adjustment disorder                             | 488 (1.1)     | 27 (0.8)     | 14 (1.7)   | 270 (1.2)         | 89 (1.1)          | 87 (1.3)         | 52 (1.1)          | 75 (1.1)            |
| Anxiety                                         | 10,636 (24.5) | 875 (24.8)   | 158 (18.6) | 5,549 (24.4)      | 1,910 (23.0)      | 1,120 (16.9)     | 1,231 (25.8)      | 1,779 (26.7)        |
| Behavioral disorder                             | 61 (0.1)      | 9 (0.3)      | 2 (0.2)    | 31 (0.1)          | 16 (0.2)          | 9 (0.1)          | 3 (0.1)           | 8 (0.1)             |
| Bipolar disorder                                | 1,570 (3.6)   | 209 (5.9)    | 47 (5.5)   | 754 (3.3)         | 387 (4.7)         | 417 (6.3)        | 159 (3.3)         | 265 (4.0)           |
| Chronic fatigue                                 | 4,338 (10.0)  | 433 (12.3)   | 99 (11.7)  | 2,210 (9.7)       | 857 (10.3)        | 735 (11.1)       | 461 (9.7)         | 748 (11.2)          |
| Depression, nonpsychotic                        | 6,505 (15.0)  | 795 (22.6)   | 105 (12.4) | 3,279 (14.4)      | 1,478 (17.8)      | 1,283 (19.3)     | 749 (15.7)        | 1,040 (15.6)        |
| Depression, other                               | 10,668 (24.6) | 1,061 (30.1) | 144 (17.0) | 5,617 (24.7)      | 2,193 (26.5)      | 1,837 (27.7)     | 1,251 (26.2)      | 1,568 (23.5)        |
| Depression, psychotic                           | 115 (0.3)     | 19 (0.5)     | 1 (0.1)    | 60 (0.3)          | 22 (0.3)          | 14 (0.2)         | 17 (0.4)          | 15 (0.2)            |
| Epilepsy/convulsion                             | 354 (0.8)     | 47 (1.3)     | 16 (1.9)   | 160 (0.7)         | 82 (1.0)          | 37 (0.6)         | 47 (1.0)          | 57 (0.9)            |
| Migraine/headache                               | 5,638 (13.0)  | 561 (15.9)   | 349 (41.2) | 2,923 (12.8)      | 1,168 (14.1)      | 869 (13.1)       | 620 (13.0)        | 895 (13.4)          |

|                                               |               |              |            |               |              |              |              |              |
|-----------------------------------------------|---------------|--------------|------------|---------------|--------------|--------------|--------------|--------------|
| Other developmental disorders <sup>1</sup>    | 32 (0.1)      | 3 (0.1)      | 0 (0.0)    | 15 (0.1)      | 8 (0.1)      | 6 (0.1)      | 2 (0.0)      | 7 (0.1)      |
| Other mental health disorders <sup>2</sup>    | 907 (2.1)     | 78 (2.2)     | 36 (4.2)   | 446 (2.0)     | 221 (2.7)    | 111 (1.7)    | 81 (1.7)     | 156 (2.3)    |
| Personality disorder                          | 164 (0.4)     | 16 (0.5)     | 8 (0.9)    | 79 (0.3)      | 35 (0.4)     | 30 (0.5)     | 16 (0.3)     | 30 (0.4)     |
| Psychosis                                     | 120 (0.3)     | 9 (0.3)      | 4 (0.5)    | 61 (0.3)      | 30 (0.4)     | 19 (0.3)     | 11 (0.2)     | 19 (0.3)     |
| Schizophrenia                                 | 33 (0.1)      | 4 (0.1)      | 1 (0.1)    | 16 (0.1)      | 8 (0.1)      | 11 (0.2)     | 1 (0.0)      | 5 (0.1)      |
| Sleep disorder                                | 1,814 (4.2)   | 217 (6.2)    | 56 (6.6)   | 959 (4.2)     | 315 (3.8)    | 330 (5.0)    | 229 (4.8)    | 310 (4.6)    |
| Psychiatric visits, N (%)                     |               |              |            |               |              |              |              |              |
| 0 visits                                      | 34,871 (80.4) | 2,717 (77.1) | 704 (83.0) | 18,569 (81.5) | 6,461 (78.0) | 5,250 (79.1) | 3,863 (81.0) | 5,238 (78.6) |
| 1 visit                                       | 1,482 (3.4)   | 143 (4.1)    | 24 (2.8)   | 772 (3.4)     | 303 (3.7)    | 231 (3.5)    | 152 (3.2)    | 237 (3.6)    |
| 2-3 visits                                    | 2,044 (4.7)   | 210 (6.0)    | 26 (3.1)   | 987 (4.3)     | 426 (5.1)    | 343 (5.2)    | 232 (4.9)    | 364 (5.5)    |
| 4+ visits                                     | 4,954 (11.4)  | 455 (12.9)   | 94 (11.1)  | 2,459 (10.8)  | 1,097 (13.2) | 814 (12.3)   | 524 (11.0)   | 829 (12.4)   |
| Mental health diagnoses, N (%)                |               |              |            |               |              |              |              |              |
| 0 diagnoses                                   | 24,695 (57.0) | 1,700 (48.2) | 558 (65.8) | 13,383 (58.7) | 4,493 (54.2) | 3,620 (54.5) | 2,602 (54.5) | 3,637 (54.5) |
| 1 diagnosis                                   | 8,106 (18.7)  | 686 (19.5)   | 103 (12.1) | 4,174 (18.3)  | 1,503 (18.1) | 1,227 (18.5) | 990 (20.8)   | 1,279 (19.2) |
| 2-3 diagnoses                                 | 8,162 (18.8)  | 832 (23.6)   | 136 (16.0) | 4,089 (17.9)  | 1,725 (20.8) | 1,338 (20.2) | 912 (19.1)   | 1,352 (20.3) |
| 4+ diagnoses                                  | 2,388 (5.5)   | 307 (8.7)    | 51 (6.0)   | 1,141 (5.0)   | 566 (6.8)    | 453 (6.8)    | 267 (5.6)    | 400 (6.0)    |
| Mental health ER visits, N (%)                |               |              |            |               |              |              |              |              |
| 0 visits                                      | 42,089 (97.1) | 3,399 (96.4) | 816 (96.2) | 22,170 (97.3) | 8,015 (96.7) | 6,446 (97.1) | 4,620 (96.8) | 6,463 (96.9) |
| 1 visit                                       | 878 (2.0)     | 90 (2.6)     | 24 (2.8)   | 435 (1.9)     | 186 (2.2)    | 146 (2.2)    | 101 (2.1)    | 145 (2.2)    |
| 2-3 visits                                    | 304 (0.7)     | 28 (0.8)     | 6 (0.7)    | 145 (0.6)     | 66 (0.8)     | 32 (0.5)     | 43 (0.9)     | 46 (0.7)     |
| 4+ visits                                     | 80 (0.2)      | 8 (0.2)      | 2 (0.2)    | 37 (0.2)      | 20 (0.2)     | 14 (0.2)     | 7 (0.1)      | 14 (0.2)     |
| Mental health hospitalizations, N (%)         |               |              |            |               |              |              |              |              |
| 0 visits                                      | 42,667 (98.4) | 3,451 (97.9) | 835 (98.5) | 22,437 (98.5) | 8,132 (98.1) | 6,522 (98.3) | 4,696 (98.4) | 6,581 (98.7) |
| 1 visit                                       | 339 (0.8)     | 34 (1.0)     | 8 (0.9)    | 168 (0.7)     | 80 (1.0)     | 55 (0.8)     | 41 (0.9)     | 42 (0.6)     |
| 2-3 visits                                    | 253 (0.6)     | 32 (0.9)     | 4 (0.5)    | 137 (0.6)     | 50 (0.6)     | 42 (0.6)     | 26 (0.5)     | 34 (0.5)     |
| 4+ visits                                     | 92 (0.2)      | 8 (0.2)      | 1 (0.1)    | 45 (0.2)      | 25 (0.3)     | 19 (0.3)     | 8 (0.2)      | 11 (0.2)     |
| Other psychiatric medications, N (%)          |               |              |            |               |              |              |              |              |
| 0 drugs                                       | 38,143 (88.0) | 2,756 (78.2) | 667 (78.7) | 20,373 (89.4) | 7,034 (84.9) | 5,556 (83.7) | 4,177 (87.5) | 5,782 (86.7) |
| 1 drug                                        | 2,215 (5.1)   | 252 (7.1)    | 70 (8.3)   | 1,076 (4.7)   | 530 (6.4)    | 366 (5.5)    | 244 (5.1)    | 342 (5.1)    |
| 2-3 drugs                                     | 2,518 (5.8)   | 397 (11.3)   | 82 (9.7)   | 1,149 (5.0)   | 593 (7.2)    | 582 (8.8)    | 296 (6.2)    | 448 (6.7)    |
| 4+ drugs                                      | 475 (1.1)     | 120 (3.4)    | 29 (3.4)   | 189 (0.8)     | 130 (1.6)    | 134 (2.0)    | 54 (1.1)     | 96 (1.4)     |
| Outpatient visits (based on quartiles), N (%) |               |              |            |               |              |              |              |              |
| Low                                           | 5,636 (13.0)  | 391 (11.1)   | 76 (9.0)   | 3,007 (13.2)  | 1,053 (12.7) | 846 (12.7)   | 613 (12.8)   | 810 (12.1)   |
| Low to moderate                               | 7,434 (17.1)  | 556 (15.8)   | 129 (15.2) | 4,005 (17.6)  | 1,317 (15.9) | 1,104 (16.6) | 838 (17.6)   | 1,076 (16.1) |
| Moderate to high                              | 12,878 (29.7) | 977 (27.7)   | 234 (27.6) | 6,868 (30.1)  | 2,359 (28.5) | 1,946 (29.3) | 1,420 (29.8) | 1,967 (29.5) |
| High                                          | 17,403 (40.1) | 1,601 (45.4) | 409 (48.2) | 8,907 (39.1)  | 3,558 (42.9) | 2,742 (41.3) | 1,900 (39.8) | 2,815 (42.2) |
| Hospitalizations, N (%)                       |               |              |            |               |              |              |              |              |

|                                                     |               |              |            |               |              |              |              |              |
|-----------------------------------------------------|---------------|--------------|------------|---------------|--------------|--------------|--------------|--------------|
| 0 visits                                            | 41,405 (95.5) | 3,343 (94.8) | 776 (91.5) | 21,787 (95.6) | 7,862 (94.9) | 6,356 (95.8) | 4,560 (95.6) | 6,386 (95.8) |
| 1 visit                                             | 1,310 (3.0)   | 127 (3.6)    | 47 (5.5)   | 682 (3.0)     | 287 (3.5)    | 183 (2.8)    | 137 (2.9)    | 182 (2.7)    |
| 2-3 visits                                          | 420 (1.0)     | 33 (0.9)     | 18 (2.1)   | 202 (0.9)     | 90 (1.1)     | 58 (0.9)     | 53 (1.1)     | 70 (1.0)     |
| 4+ visits                                           | 216 (0.5)     | 22 (0.6)     | 7 (0.8)    | 116 (0.5)     | 48 (0.6)     | 41 (0.6)     | 21 (0.4)     | 30 (0.4)     |
| Lifestyle behaviors/<br>environmental, N (%)        |               |              |            |               |              |              |              |              |
| Alcohol abuse                                       | 241 (0.6)     | 35 (1.0)     | 6 (0.7)    | 102 (0.4)     | 70 (0.8)     | 38 (0.6)     | 24 (0.5)     | 45 (0.7)     |
| Tobacco use                                         | 1,168 (2.7)   | 132 (3.7)    | 34 (4.0)   | 577 (2.5)     | 217 (2.6)    | 210 (3.2)    | 190 (4.0)    | 170 (2.5)    |
| Substance abuse                                     | 382 (0.9)     | 61 (1.7)     | 28 (3.3)   | 174 (0.8)     | 90 (1.1)     | 67 (1.0)     | 60 (1.3)     | 58 (0.9)     |
| Hyperemesis/nausea and<br>vomiting in pregnancy     | 6,065 (14.0)  | 586 (16.6)   | 174 (20.5) | 3,209 (14.1)  | 1,154 (13.9) | 833 (12.5)   | 686 (14.4)   | 948 (14.2)   |
| Poor nutrition                                      | 1,224 (2.8)   | 98 (2.8)     | 38 (4.5)   | 666 (2.9)     | 236 (2.8)    | 181 (2.7)    | 139 (2.9)    | 196 (2.9)    |
| Start of prenatal care,<br>gestational month, N (%) |               |              |            |               |              |              |              |              |
| Month 1                                             | 2,754 (6.4)   | 196 (5.6)    | 75 (8.8)   | 1,448 (6.4)   | 498 (6.0)    | 410 (6.2)    | 344 (7.2)    | 411 (6.2)    |
| Month 2                                             | 18,485 (42.6) | 1,456 (41.3) | 324 (38.2) | 9,732 (42.7)  | 3,498 (42.2) | 2,779 (41.9) | 2,106 (44.1) | 2,850 (42.7) |
| Month 3                                             | 10,948 (25.3) | 919 (26.1)   | 202 (23.8) | 5,711 (25.1)  | 2,134 (25.8) | 1,632 (24.6) | 1,240 (26.0) | 1,691 (25.4) |
| Month 4                                             | 2,526 (5.8)   | 214 (6.1)    | 61 (7.2)   | 1,322 (5.8)   | 518 (6.3)    | 411 (6.2)    | 265 (5.6)    | 371 (5.6)    |
| Month 5                                             | 1,166 (2.7)   | 97 (2.8)     | 28 (3.3)   | 617 (2.7)     | 223 (2.7)    | 216 (3.3)    | 101 (2.1)    | 193 (2.9)    |
| Month 6                                             | 610 (1.4)     | 53 (1.5)     | 16 (1.9)   | 324 (1.4)     | 110 (1.3)    | 95 (1.4)     | 71 (1.5)     | 98 (1.5)     |
| Month 7                                             | 942 (2.2)     | 81 (2.3)     | 14 (1.7)   | 518 (2.3)     | 168 (2.0)    | 149 (2.2)    | 96 (2.0)     | 132 (2.0)    |
| Month 8                                             | 420 (1.0)     | 44 (1.2)     | 14 (1.7)   | 208 (0.9)     | 95 (1.1)     | 79 (1.2)     | 40 (0.8)     | 69 (1.0)     |
| Month 9                                             | 591 (1.4)     | 49 (1.4)     | 15 (1.8)   | 299 (1.3)     | 114 (1.4)    | 83 (1.3)     | 72 (1.5)     | 91 (1.4)     |
| No prenatal care                                    | 4,909 (11.3)  | 416 (11.8)   | 99 (11.7)  | 2,608 (11.4)  | 929 (11.2)   | 784 (11.8)   | 436 (9.1)    | 762 (11.4)   |
| Prenatal care index, N (%)                          |               |              |            |               |              |              |              |              |
| Adequate plus                                       | 3,129 (7.2)   | 278 (7.9)    | 75 (8.8)   | 1,604 (7.0)   | 639 (7.7)    | 485 (7.3)    | 374 (7.8)    | 464 (7.0)    |
| Adequate                                            | 3,227 (7.4)   | 280 (7.9)    | 70 (8.3)   | 1,692 (7.4)   | 662 (8.0)    | 495 (7.5)    | 369 (7.7)    | 468 (7.0)    |
| Intermediate                                        | 8,937 (20.6)  | 767 (21.8)   | 193 (22.8) | 4,735 (20.8)  | 1,756 (21.2) | 1,293 (19.5) | 1,022 (21.4) | 1,281 (19.2) |
| Inadequate                                          | 28,058 (64.7) | 2,200 (62.4) | 510 (60.1) | 14,756 (64.8) | 5,230 (63.1) | 4,365 (65.8) | 3,006 (63.0) | 4,455 (66.8) |
| Start of prenatal vitamins, N<br>(%)                |               |              |            |               |              |              |              |              |
| 3 <sup>rd</sup> month prior to LMP                  | 2,128 (4.9)   | 141 (4.0)    | 40 (4.7)   | 1,139 (5.0)   | 453 (5.5)    | 310 (4.7)    | 193 (4.0)    | 316 (4.7)    |
| 2 <sup>nd</sup> month prior to LMP                  | 1,361 (3.1)   | 76 (2.2)     | 20 (2.4)   | 704 (3.1)     | 277 (3.3)    | 184 (2.8)    | 118 (2.5)    | 227 (3.4)    |
| 1 <sup>st</sup> month prior to LMP                  | 1,017 (2.3)   | 67 (1.9)     | 30 (3.5)   | 553 (2.4)     | 186 (2.2)    | 154 (2.3)    | 84 (1.8)     | 166 (2.5)    |
| Month 1                                             | 2,137 (4.9)   | 138 (3.9)    | 39 (4.6)   | 1,122 (4.9)   | 411 (5.0)    | 324 (4.9)    | 226 (4.7)    | 317 (4.8)    |
| Month 2                                             | 5,808 (13.4)  | 445 (12.6)   | 124 (14.6) | 2,997 (13.2)  | 1,188 (14.3) | 899 (13.5)   | 554 (11.6)   | 938 (14.1)   |
| Month 3                                             | 3,040 (7.0)   | 273 (7.7)    | 64 (7.5)   | 1,607 (7.1)   | 613 (7.4)    | 559 (8.4)    | 267 (5.6)    | 466 (7.0)    |
| Month 4                                             | 1,231 (2.8)   | 116 (3.3)    | 27 (3.2)   | 657 (2.9)     | 232 (2.8)    | 214 (3.2)    | 113 (2.4)    | 192 (2.9)    |
| Month 5                                             | 677 (1.6)     | 70 (2.0)     | 18 (2.1)   | 349 (1.5)     | 143 (1.7)    | 112 (1.7)    | 63 (1.3)     | 108 (1.6)    |
| Month 6                                             | 445 (1.0)     | 48 (1.4)     | 11 (1.3)   | 239 (1.0)     | 81 (1.0)     | 82 (1.2)     | 40 (0.8)     | 70 (1.0)     |
| Month 7                                             | 476 (1.1)     | 38 (1.1)     | 10 (1.2)   | 248 (1.1)     | 94 (1.1)     | 70 (1.1)     | 44 (0.9)     | 83 (1.2)     |
| Month 8                                             | 261 (0.6)     | 31 (0.9)     | 4 (0.5)    | 134 (0.6)     | 43 (0.5)     | 50 (0.8)     | 34 (0.7)     | 46 (0.7)     |
| Month 9                                             | 131 (0.3)     | 11 (0.3)     | 4 (0.5)    | 65 (0.3)      | 22 (0.3)     | 11 (0.2)     | 9 (0.2)      | 29 (0.4)     |
| No prenatal vitamins                                | 24,639 (56.8) | 2,071 (58.8) | 457 (53.9) | 12,973 (56.9) | 4,544 (54.8) | 3,669 (55.3) | 3,026 (63.4) | 3,710 (55.6) |

|                                                  |               |              |            |              |              |              |              |              |
|--------------------------------------------------|---------------|--------------|------------|--------------|--------------|--------------|--------------|--------------|
| Comorbidities, N (%)                             |               |              |            |              |              |              |              |              |
| Asthma                                           | 2,411 (5.6)   | 186 (5.3)    | 63 (7.4)   | 1,283 (5.6)  | 487 (5.9)    | 403 (6.1)    | 258 (5.4)    | 369 (5.5)    |
| Autoimmune disorder                              | 1,525 (3.5)   | 173 (4.9)    | 52 (6.1)   | 779 (3.4)    | 293 (3.5)    | 216 (3.3)    | 176 (3.7)    | 256 (3.8)    |
| Pregestational diabetes                          | 4,282 (9.9)   | 431 (12.2)   | 104 (12.3) | 2,243 (9.8)  | 742 (9.0)    | 609 (9.2)    | 496 (10.4)   | 725 (10.9)   |
| GBS infection                                    | 803 (1.9)     | 68 (1.9)     | 18 (2.1)   | 430 (1.9)    | 151 (1.8)    | 100 (1.5)    | 82 (1.7)     | 128 (1.9)    |
| Pregestational hypertension                      | 3,469 (8.0)   | 471 (13.4)   | 109 (12.9) | 1,835 (8.1)  | 656 (7.9)    | 614 (9.2)    | 394 (8.3)    | 519 (7.8)    |
| Influenza                                        | 636 (1.5)     | 67 (1.9)     | 15 (1.8)   | 334 (1.5)    | 110 (1.3)    | 79 (1.2)     | 80 (1.7)     | 104 (1.6)    |
| Other STD infection                              | 362 (0.8)     | 19 (0.5)     | 11 (1.3)   | 184 (0.8)    | 74 (0.9)     | 66 (1.0)     | 41 (0.9)     | 56 (0.8)     |
| Overweight/obesity                               | 2,579 (5.9)   | 254 (7.2)    | 56 (6.6)   | 1,386 (6.1)  | 469 (5.7)    | 354 (5.3)    | 349 (7.3)    | 366 (5.5)    |
| Renal disease                                    | 106 (0.2)     | 17 (0.5)     | 3 (0.4)    | 57 (0.3)     | 20 (0.2)     | 13 (0.2)     | 12 (0.3)     | 17 (0.3)     |
| TORCH infection                                  | 298 (0.7)     | 23 (0.7)     | 7 (0.8)    | 146 (0.6)    | 69 (0.8)     | 41 (0.6)     | 36 (0.8)     | 43 (0.6)     |
| Obstetric Comorbidity Index <sup>3</sup> , N (%) |               |              |            |              |              |              |              |              |
| 0                                                | 14,817 (34.2) | 992 (28.1)   | 251 (29.6) | 7,946 (34.9) | 2,740 (33.1) | 2,169 (32.7) | 1,639 (34.4) | 2,235 (33.5) |
| 1                                                | 12,117 (28.0) | 868 (24.6)   | 194 (22.9) | 6,364 (27.9) | 2,336 (28.2) | 1,897 (28.6) | 1,287 (27.0) | 1,868 (28.0) |
| 2                                                | 7,963 (18.4)  | 660 (18.7)   | 147 (17.3) | 4,144 (18.2) | 1,527 (18.4) | 1,196 (18.0) | 891 (18.7)   | 1,246 (18.7) |
| 3+                                               | 8,454 (19.5)  | 1,005 (28.5) | 256 (30.2) | 4,333 (19.0) | 1,684 (20.3) | 1,376 (20.7) | 954 (20.0)   | 1,319 (19.8) |
| Other prescription medications, N (%)            |               |              |            |              |              |              |              |              |
| Anticonvulsants                                  | 2,094 (4.8)   | 364 (10.3)   | 114 (13.4) | 957 (4.2)    | 522 (6.3)    | 469 (7.1)    | 221 (4.6)    | 383 (5.7)    |
| Antidiabetics                                    | 2,546 (5.9)   | 280 (7.9)    | 53 (6.3)   | 1,312 (5.8)  | 465 (5.6)    | 422 (6.4)    | 309 (6.5)    | 429 (6.4)    |
| Antihypertensives                                | 4,919 (11.3)  | 596 (16.9)   | 191 (22.5) | 2,457 (10.8) | 1,028 (12.4) | 848 (12.8)   | 547 (11.5)   | 800 (12.0)   |
| Antipsychotics                                   | 1,088 (2.5)   | 212 (6.0)    | 45 (5.3)   | 465 (2.0)    | 309 (3.7)    | 242 (3.6)    | 116 (2.4)    | 199 (3.0)    |
| Anxiolytics                                      | 976 (2.3)     | 112 (3.2)    | 30 (3.5)   | 465 (2.0)    | 215 (2.6)    | 188 (2.8)    | 138 (2.9)    | 169 (2.5)    |
| Barbiturates                                     | 2,698 (6.2)   | 270 (7.7)    | 168 (19.8) | 1,385 (6.1)  | 586 (7.1)    | 427 (6.4)    | 289 (6.1)    | 430 (6.4)    |
| Benzodiazepines                                  | 7,514 (17.3)  | 822 (23.3)   | 207 (24.4) | 3,696 (16.2) | 1,576 (19.0) | 1,083 (16.3) | 876 (18.4)   | 1,289 (19.3) |
| Corticosteroids                                  | 13,075 (30.2) | 1,129 (32.0) | 343 (40.4) | 6,704 (29.4) | 2,517 (30.4) | 2,017 (30.4) | 1,512 (31.7) | 2,131 (32.0) |
| Insulin                                          | 1,294 (3.0)   | 151 (4.3)    | 34 (4.0)   | 665 (2.9)    | 225 (2.7)    | 190 (2.9)    | 157 (3.3)    | 215 (3.2)    |
| NSAIDs                                           | 6,425 (14.8)  | 637 (18.1)   | 259 (30.5) | 3,342 (14.7) | 1,324 (16.0) | 1,041 (15.7) | 732 (15.3)   | 968 (14.5)   |
| Opioids                                          | 13,596 (31.4) | 1,263 (35.8) | 430 (50.7) | 6,975 (30.6) | 2,790 (33.7) | 2,244 (33.8) | 1,508 (31.6) | 2,125 (31.9) |
| Other hypnotics                                  | 6,310 (14.6)  | 682 (19.3)   | 210 (24.8) | 3,253 (14.3) | 1,257 (15.2) | 1,088 (16.4) | 693 (14.5)   | 1,080 (16.2) |
| OAD treatment                                    | 132 (0.3)     | 32 (0.9)     | 13 (1.5)   | 59 (0.3)     | 41 (0.5)     | 29 (0.4)     | 19 (0.4)     | 15 (0.2)     |
| Progestins                                       | 7,167 (16.5)  | 586 (16.6)   | 153 (18.0) | 3,696 (16.2) | 1,357 (16.4) | 1,108 (16.7) | 792 (16.6)   | 1,204 (18.1) |
| Psychostimulants                                 | 1,210 (2.8)   | 178 (5.0)    | 24 (2.8)   | 592 (2.6)    | 275 (3.3)    | 363 (5.5)    | 137 (2.9)    | 200 (3.0)    |
| Known teratogens                                 | 365 (0.8)     | 43 (1.2)     | 14 (1.7)   | 183 (0.8)    | 81 (1.0)     | 75 (1.1)     | 45 (0.9)     | 51 (0.8)     |
| Suspected teratogens                             | 7,205 (16.6)  | 620 (17.6)   | 192 (22.6) | 3,823 (16.8) | 1,385 (16.7) | 1,184 (17.8) | 848 (17.8)   | 1,065 (16.0) |
| Triptans                                         | 1,594 (3.7)   | 198 (5.6)    | 109 (12.9) | 767 (3.4)    | 347 (4.2)    | 298 (4.5)    | 178 (3.7)    | 282 (4.2)    |

<sup>1</sup>Other neurodevelopmental disorders include autism spectrum disorder, speech/language disorder, developmental coordination disorder, intellectual disability, and specific learning disorder.

<sup>2</sup>Other mental health disorders include delirium, dementia, tic disorder, somatoform spectrum disorder, eating disorder, psychotherapy, self-inflicted injury.

<sup>3</sup>As defined by Bateman et al. (2013): Development of a comorbidity index for use in obstetric patients.

eTable 20. Hazard ratios and 95% confidence intervals for antidepressant exposed exclusive to early or late gestational windows and neurodevelopmental disorders, results pooled across data sources

| Outcome                                                                  | N events in exposed | N events in unexposed | Unadjusted HR (95% CI) | Adjusted HR (95% CI) |
|--------------------------------------------------------------------------|---------------------|-----------------------|------------------------|----------------------|
| <b>Exposed in late pregnancy, but not in early pregnancy (N=52,201)</b>  |                     |                       |                        |                      |
| ASD                                                                      | 336                 | 11642                 | 1.64 (1.46, 1.85)      | 1.05 (0.93, 1.19)    |
| ADHD                                                                     | 2017                | 54960                 | 2.00 (1.91, 2.09)      | 1.22 (1.16, 1.28)    |
| Specific learning disorders                                              | 146                 | 5755                  | 1.27 (1.07, 1.51)      | 1.09 (0.91, 1.30)    |
| Developmental speech/language disorder                                   | 215                 | 10565                 | 1.48 (1.41, 1.56)      | 1.11 (1.06, 1.17)    |
| Developmental coordination disorder                                      | 94                  | 3325                  | 1.07 (0.92, 1.25)      | 0.96 (0.83, 1.11)    |
| Intellectual disability                                                  | 83                  | 3011                  | 1.32 (1.06, 1.64)      | 1.01 (0.80, 1.27)    |
| Behavioral disorder                                                      | 1324                | 35522                 | 1.89 (1.78, 2.00)      | 1.17 (1.10, 1.24)    |
| Any NDD                                                                  | 4162                | 138704                | 1.69 (1.63, 1.74)      | 1.16 (1.12, 1.19)    |
| <b>Exposed in early pregnancy, but not in late pregnancy (N=104,995)</b> |                     |                       |                        |                      |
| ASD                                                                      | 701                 | 11642                 | 1.74 (1.60, 1.90)      | 1.06 (0.96, 1.17)    |
| ADHD                                                                     | 3710                | 54960                 | 1.96 (1.90, 2.03)      | 1.14 (1.09, 1.19)    |
| Specific learning disorders                                              | 290                 | 5755                  | 1.36 (1.20, 1.54)      | 1.09 (0.94, 1.26)    |
| Developmental speech/language disorder                                   | 3372                | 67866                 | 1.45 (1.40, 1.51)      | 1.01 (0.97, 1.05)    |
| Developmental coordination disorder                                      | 475                 | 10565                 | 1.23 (1.11, 1.37)      | 1.00 (0.89, 1.11)    |
| Intellectual disability                                                  | 183                 | 3011                  | 1.58 (1.36, 1.84)      | 1.06 (0.87, 1.28)    |
| Behavioral disorder                                                      | 2351                | 35522                 | 1.79 (1.71, 1.87)      | 1.07 (1.01, 1.13)    |
| Any NDD                                                                  | 7648                | 138704                | 1.64 (1.60, 1.68)      | 1.06 (1.03, 1.09)    |

Early pregnancy (secondary exposure window): LMP to 126 days after LMP

Late pregnancy (primary exposure window): 127 days after LMP to the day prior to delivery

eTable 21. Counts and crude and adjusted HR (95% CI) for sibling analysis for antidepressant use during late and early pregnancy compared to unexposed, pooled MAX and MarketScan data

| Outcome                         | Counts of siblings discordant on antidepressant exposure status and outcome timing |                        |           | Unadjusted HR (95% CI) | Adjusted HR (95% CI) |
|---------------------------------|------------------------------------------------------------------------------------|------------------------|-----------|------------------------|----------------------|
|                                 | Sibling sets                                                                       | Antidepressant exposed | Unexposed |                        |                      |
| <b>Late pregnancy exposure</b>  |                                                                                    |                        |           |                        |                      |
| ASD                             | 163                                                                                | 175                    | 223       | 0.96 (0.70, 1.30)      | 0.87 (0.60, 1.25)    |
| ADHD                            | 856                                                                                | 950                    | 1121      | 0.92 (0.80, 1.05)      | 0.94 (0.81, 1.09)    |
| Specific learning disorders     | 70                                                                                 | 80                     | 97        | 1.00 (0.63, 1.61)      | 0.78 (0.43, 1.41)    |
| Developmental speech/language   | 982                                                                                | 1081                   | 1312      | 1.11 (0.98, 1.25)      | 1.01 (0.88, 1.16)    |
| Developmental coordination      | 150                                                                                | 164                    | 204       | 0.99 (0.72, 1.36)      | 0.75 (0.51, 1.10)    |
| Intellectual disability         | 50                                                                                 | 57                     | 75        | 0.84 (0.48, 1.48)      | 1.01 (0.46, 2.22)    |
| Behavioral disorder             | 635                                                                                | 692                    | 839       | 0.92 (0.79, 1.07)      | 0.96 (0.81, 1.13)    |
| Any NDD                         | 1908                                                                               | 2097                   | 2519      | 1.01 (0.93, 1.11)      | 0.97 (0.88, 1.06)    |
| <b>Early pregnancy exposure</b> |                                                                                    |                        |           |                        |                      |
| ASD                             | 227                                                                                | 246                    | 296       | 0.91 (0.70, 1.18)      | 0.91 (0.67, 1.25)    |
| ADHD                            | 1217                                                                               | 1374                   | 1649      | 0.97 (0.87, 1.08)      | 1.02 (0.90, 1.16)    |
| Specific learning disorders     | 101                                                                                | 110                    | 156       | 1.15 (0.78, 1.71)      | 1.17 (0.71, 1.94)    |
| Developmental speech/language   | 1392                                                                               | 1519                   | 1897      | 1.10 (0.99, 1.22)      | 1.02 (0.90, 1.14)    |
| Developmental coordination      | 249                                                                                | 278                    | 345       | 1.01 (0.79, 1.29)      | 0.88 (0.65, 1.20)    |
| Intellectual disability         | 67                                                                                 | 76                     | 93        | 0.78 (0.48, 1.27)      | 0.72 (0.36, 1.46)    |
| Behavioral disorder             | 915                                                                                | 1009                   | 1250      | 1.01 (0.89, 1.15)      | 1.06 (0.92, 1.23)    |
| Any NDD                         | 2786                                                                               | 3080                   | 3755      | 1.02 (0.95, 1.10)      | 0.99 (0.91, 1.07)    |



eTable 22. Crude and adjusted HR (95% CI) within the full sibling population for antidepressant use during late pregnancy compared to unexposed, pooled MAX and MarketScan data

|                               | <b>Antidepressant exposed</b> | <b>Unexposed</b> | <b>Unadjusted HR<sup>1</sup><br/>(95% CI)</b> | <b>Adjusted HR<sup>1</sup><br/>(95% CI)</b> |
|-------------------------------|-------------------------------|------------------|-----------------------------------------------|---------------------------------------------|
| Total included                | 32,584                        | 813,384          |                                               |                                             |
| ASD                           | 289                           | 4,042            | 1.93 (1.71, 2.18)                             | 1.13 (0.95, 1.35)                           |
| ADHD                          | 1,529                         | 22,505           | 2.02 (1.91, 2.13)                             | 1.28 (1.20, 1.37)                           |
| Specific learning disorders   | 119                           | 2,345            | 1.43 (1.19, 1.73)                             | 1.10 (0.87, 1.38)                           |
| Developmental speech/language | 1,519                         | 25,267           | 1.62 (1.54, 1.71)                             | 1.15 (1.07, 1.23)                           |
| Developmental coordination    | 205                           | 3,538            | 1.51 (1.31, 1.75)                             | 1.15 (0.94, 1.40)                           |
| Intellectual disability       | 61                            | 1,115            | 1.51 (1.15, 1.98)                             | 1.25 (0.92, 1.72)                           |
| Behavioral disorder           | 1,013                         | 15,007           | 1.93 (1.80, 2.06)                             | 1.10 (1.00, 1.21)                           |
| Any NDD                       | 3,306                         | 54,053           | 1.76 (1.70, 1.83)                             | 1.17 (1.11, 1.23)                           |

<sup>1</sup>Not stratified by identifier

eFigure. Unadjusted cumulative incidence of select neurodevelopment disorders stratified by antidepressant exposure status during pregnancy and data source

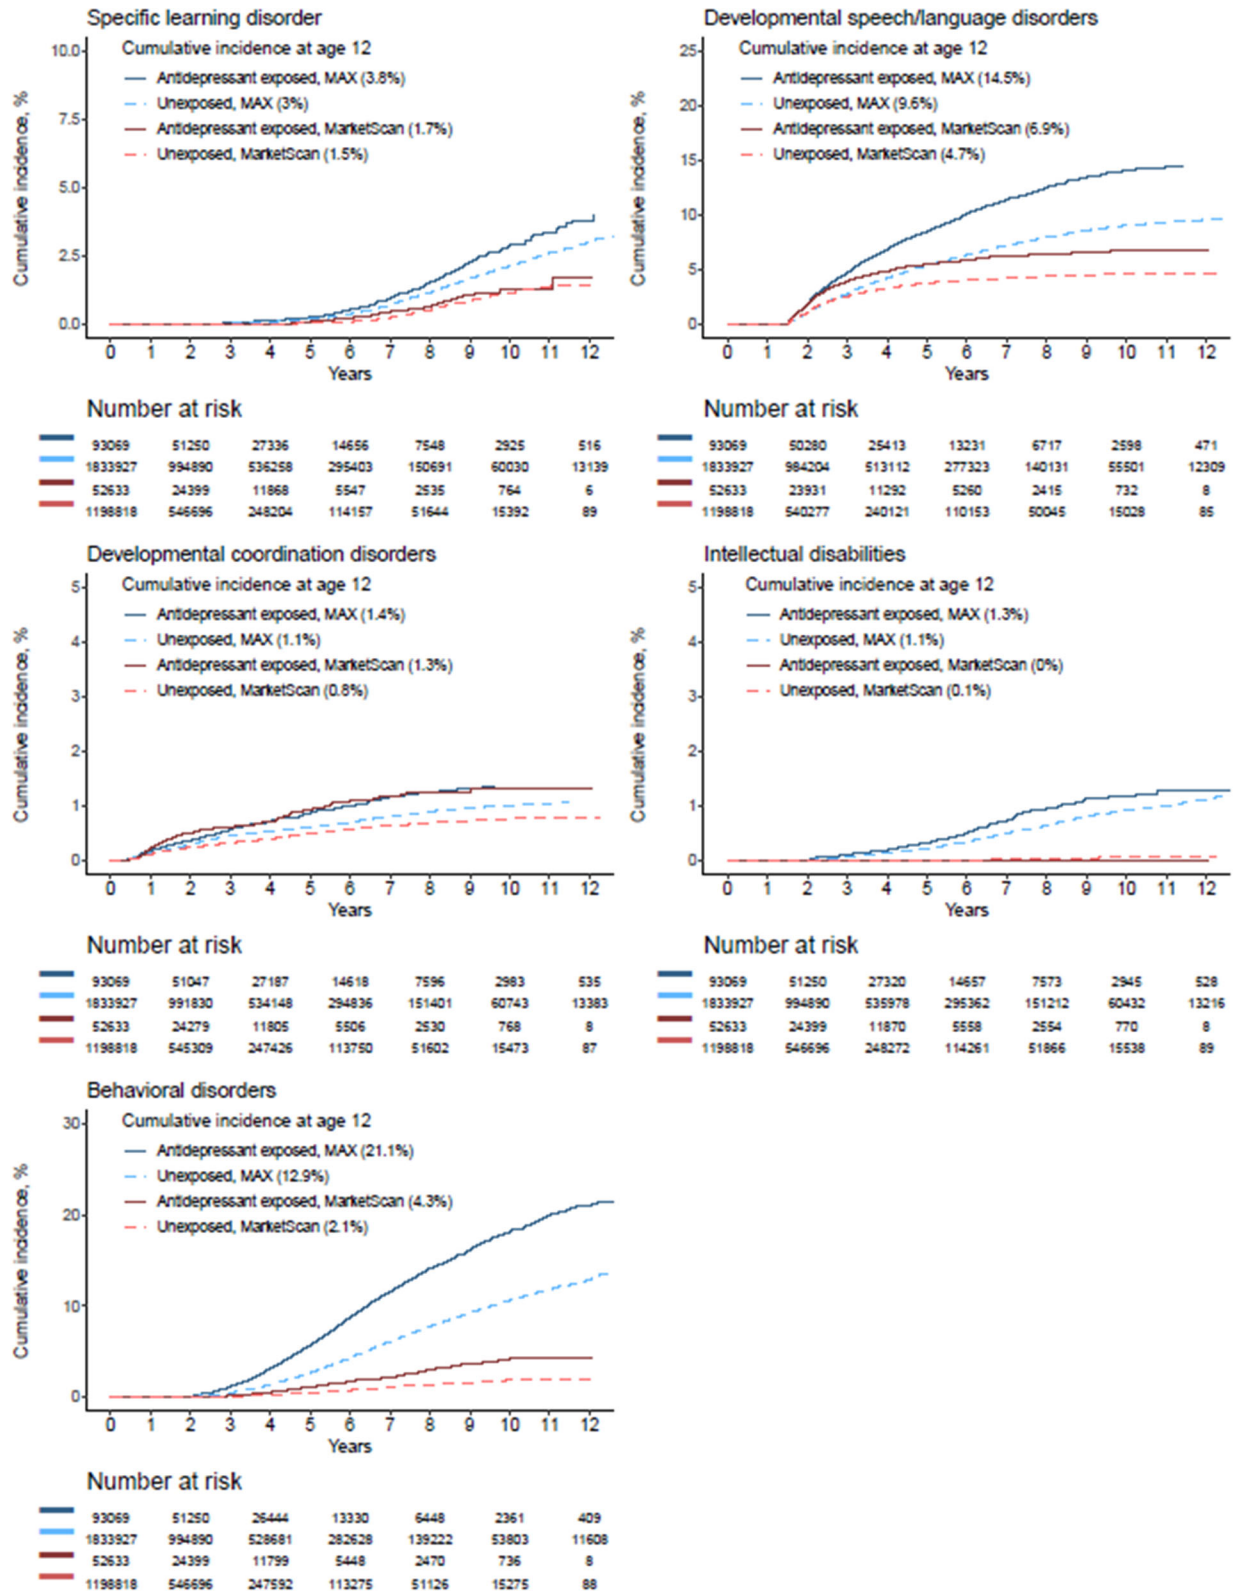

Supplement: jamainternmed-e224268-s001.pdf [file jamainternmed-e224268-s001.pdf]
